# Supplementary material for: Behavioral and brain anatomical analysis of Foxg1 heterozygous mice
Source: PubMed Central journal article supplement (PMC9555627; doi:10.1371/journal.pone.0266861), 2022-10-12
Supplement: pone.0266861.s001.pdf [file pone.0266861.s001.pdf]

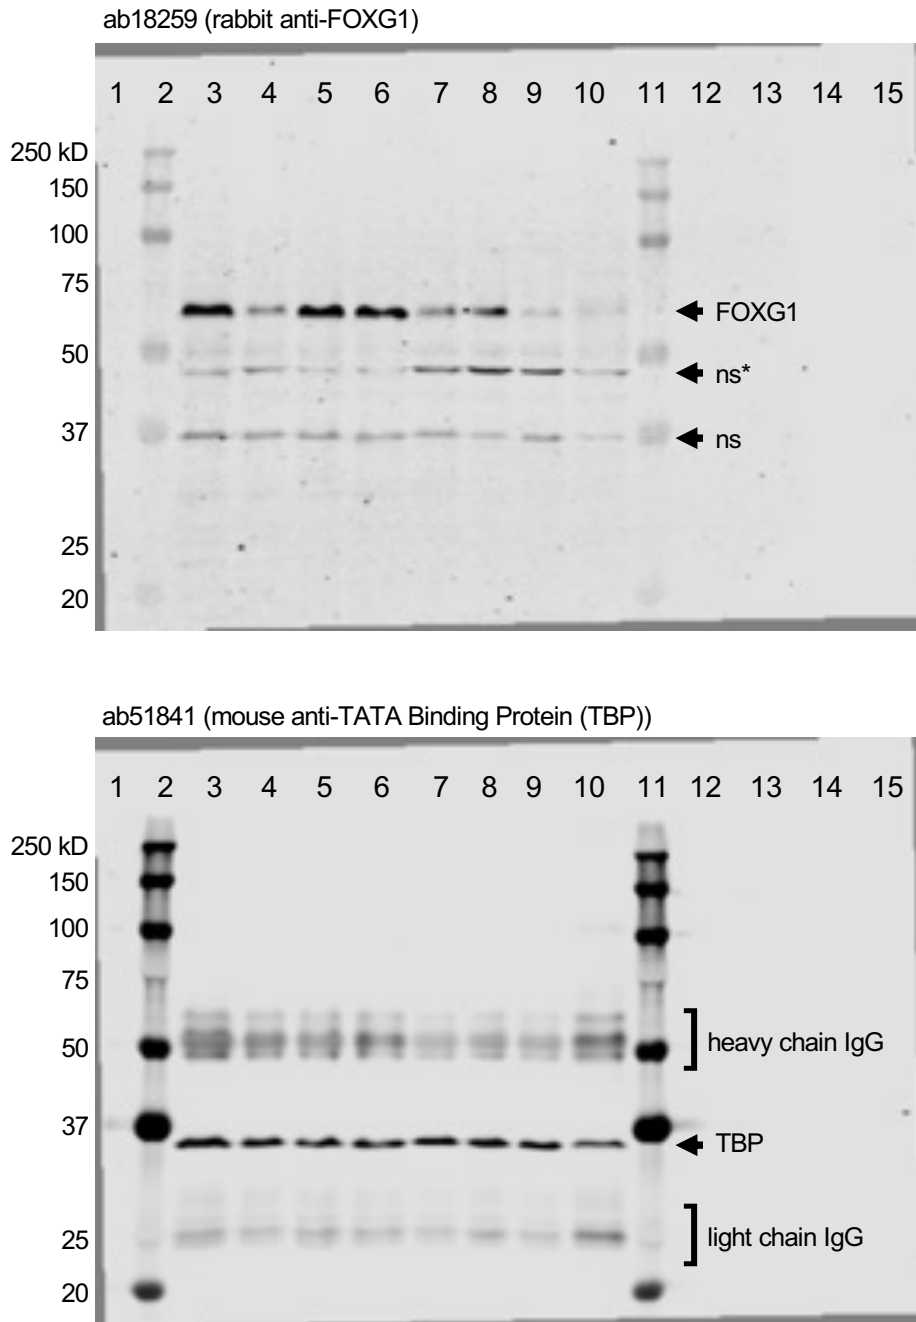

**Figure S1.** Original western blot scans from Figure 1b. Lanes 1, 12-15: blank; Lanes 2, 11: molecular weight marker; Lanes 3-6: WT e16.5 embryonic mouse brain lysates; Lanes 7-10: Foxg1-MUT e16.5 embryonic mouse brain lysates (littermates to WT); ns: nonspecific band; ns\*: The ~48 kD band in the FOXG1 blot has been reported as nonspecific reactivity to ab18259 (Verginelli *et al.*, 2013) and showed a similar shift in intensity following shRNA knockdown of FOXG1 in cultured brain tumor initiating cells.
