# Supplementary material for: Behavioral and brain anatomical analysis of Foxg1 heterozygous mice
Source: PubMed Central journal article supplement (PMC9555627; doi:10.1371/journal.pone.0266861), 2022-10-12
Supplement: pone.0266861.s003.pdf [file pone.0266861.s003.pdf]

Supplement 2: S2\_Interaction\_Statistical\_Output. Bold indicates p<0.05

| Weight                       | Genotype |              | Sex      |              | Genotype*Sex |         |
|------------------------------|----------|--------------|----------|--------------|--------------|---------|
|                              | F [1,26] | p-value      | F [1,26] | p-value      | F [1,26]     | p-value |
| BODY WEIGHT (g)              | 1.785    | 0.193        | 105.671  | <b>0.000</b> | 1.017        | 0.322   |
| BRAIN WEIGHT (mg)            | 22.485   | <b>0.000</b> | 6.183    | <b>0.019</b> | 0.512        | 0.480   |
| Rotarod                      | Genotype |              | Sex      |              | Genotype*Sex |         |
|                              | F [1,26] | p-value      | F [1,26] | p-value      | F [1,26]     | p-value |
| Day 1 Average                | 0.000    | 0.993        | 1.833    | 0.187        | 0.001        | 0.971   |
| Day 2 Average                | 0.005    | 0.942        | 0.963    | 0.336        | 0.640        | 0.431   |
| Day 3 Average                | 0.260    | 0.614        | 9.373    | <b>0.005</b> | 0.943        | 0.340   |
| Open Field Analysis          | Genotype |              | Sex      |              | Genotype*Sex |         |
|                              | F [1,53] | p-value      | F [1,53] | p-value      | F [1,53]     | p-value |
| Total Ambulatory Distance    | 7.874    | 0.007        | 2.073    | 0.156        | 0.837        | 0.365   |
| % Distance Center            | 53.135   | 0.000        | 0.077    | 0.782        | 0.977        | 0.327   |
| % Time Center                | 6.876    | 0.011        | 0.009    | 0.926        | 0.155        | 0.696   |
| Total Vertical Counts        | 6.864    | 0.011        | 6.554    | 0.013        | 3.043        | 0.087   |
| Elevated Zero Maze           | Genotype |              | Sex      |              | Genotype*Sex |         |
|                              | F [1,21] | p-value      | F [1,21] | p-value      | F [1,21]     | p-value |
| Distance (Total)             | 0.101    | 0.754        | 0.012    | 0.914        | 0.410        | 0.529   |
| % Distance Open              | 6.747    | 0.017        | 0.072    | 0.792        | 1.296        | 0.268   |
| % Time Open                  | 0.663    | 0.425        | 0.003    | 0.956        | 0.134        | 0.718   |
| Gait                         | Genotype |              | Sex      |              | Genotype*Sex |         |
|                              | F [1,52] | p-value      | F [1,52] | p-value      | F [1,52]     | p-value |
| Forepaw Stride (ms)          | 2.762    | 0.103        | 1.260    | 0.267        | 0.501        | 0.482   |
| Forepaw % Swing              | 7.036    | <b>0.011</b> | 0.735    | 0.395        | 0.006        | 0.938   |
| Forepaw Stride Length (mm)   | 1.922    | 0.172        | 2.162    | 0.147        | 1.034        | 0.314   |
| Forepaw Print Area           | 6.512    | <b>0.014</b> | 5.615    | <b>0.022</b> | 0.004        | 0.949   |
| Hindpaw Stride (ms)          | 0.025    | 0.876        | 0.224    | 0.638        | 0.727        | 0.398   |
| Hindpaw % Swing              | 11.629   | <b>0.001</b> | 2.130    | 0.150        | 1.064        | 0.307   |
| Hindpaw Stride Length (mm)   | 5.574    | <b>0.022</b> | 0.305    | 0.583        | 1.003        | 0.321   |
| Hindpaw Print Area           | 4.194    | <b>0.046</b> | 0.012    | 0.914        | 0.007        | 0.932   |
| Front Track Width (mm)       | 0.044    | 0.835        | 1.135    | 0.292        | 0.166        | 0.685   |
| Rear Track Width (mm)        | 4.323    | <b>0.043</b> | 4.519    | <b>0.038</b> | 0.946        | 0.335   |
| Overall Avg Run Speed (mm/s) | 1.184    | 0.282        | 0.350    | 0.556        | 0.182        | 0.672   |
| Forepaw Homolateral Coupling | 3.518    | 0.066        | 1.502    | 0.226        | 0.272        | 0.604   |
| Forepaw Homologous Coupling  | 0.468    | 0.497        | 2.292    | 0.136        | 0.147        | 0.703   |
| Forepaw Diagonal Coupling    | 1.561    | 0.217        | 0.597    | 0.443        | 0.040        | 0.842   |
| Hindpaw Homolateral Coupling | 6.803    | <b>0.012</b> | 0.216    | 0.644        | 0.027        | 0.870   |
| Hindpaw Homologous Coupling  | 5.380    | <b>0.024</b> | 0.217    | 0.644        | 0.340        | 0.562   |
| Hindpaw Diagonal Coupling    | 0.515    | 0.476        | 0.052    | 0.821        | 1.132        | 0.292   |
| Forepaw Gait Angle           | 0.178    | 0.675        | 0.584    | 0.448        | 2.365        | 0.130   |
| Hindpaw Gait Angle           | 0.370    | 0.546        | 0.283    | 0.597        | 0.315        | 0.577   |
| Body Rotation (deg)          | 10.580   | <b>0.002</b> | 0.033    | 0.857        | 0.697        | 0.408   |
| Longitudinal Position (mm)   | 0.447    | 0.507        | 0.615    | 0.436        | 0.691        | 0.410   |
| Lateral Position (mm)        | 0.122    | 0.728        | 0.147    | 0.703        | 0.043        | 0.836   |
| Fear Conditioning            | Genotype |              | Sex      |              | Genotype*Sex |         |
|                              | F [1,26] | p-value      | F [1,26] | p-value      | F [1,26]     | p-value |
| Pre-stim                     | 12.801   | <b>0.001</b> | 1.561    | 0.223        | 0.001        | 0.979   |
| Context-Prestim              | 24.417   | <b>0.000</b> | 0.195    | 0.663        | 0.037        | 0.848   |
| Cue-Prestim                  | 25.389   | <b>0.000</b> | 1.316    | 0.262        | 0.219        | 0.644   |
| Marble Burying               | Genotype |              | Sex      |              | Genotype*Sex |         |
|                              | F [1,26] | p-value      | F [1,26] | p-value      | F [1,26]     | p-value |
| Marble (% buried)            | 4.501    | <b>0.044</b> | 0.389    | 0.538        | 0.148        | 0.703   |
| Tube test                    | Genotype |              | Sex      |              | Genotype*Sex |         |
|                              | F [1,26] | p-value      | F [1,26] | p-value      | F [1,26]     | p-value |
| Avg wins                     | 6.834    | <b>0.015</b> | 2.162    | 0.153        | 2.162        | 0.153   |
| Nest Building                | Genotype |              | Sex      |              | Genotype*Sex |         |
|                              | F [1,26] | p-value      | F [1,26] | p-value      | F [1,26]     | p-value |
| Nest Score                   | 6.189    | <b>0.020</b> | 0.007    | 0.933        | 0.548        | 0.466   |
| % shredded                   | 3.764    | 0.063        | 0.126    | 0.725        | 1.392        | 0.249   |
| 3 Chamber                    | Genotype |              | Sex      |              | Genotype*Sex |         |
|                              | F [1,23] | p-value      | F [1,23] | p-value      | F [1,23]     | p-value |
| Social Index Cup             | 3.903    | 0.060        | 0.808    | 0.378        | 0.013        | 0.910   |
| Social Index Chamber         | 4.637    | 0.042        | 0.238    | 0.630        | 0.135        | 0.716   |
| Novelty Index Cup            | 3.597    | 0.071        | 0.013    | 0.910        | 1.032        | 0.320   |
| Novelty Index Chamber        | 5.234    | <b>0.032</b> | 0.654    | 0.427        | 0.739        | 0.399   |
