# Supplementary material for: Behavioral and brain anatomical analysis of Foxg1 heterozygous mice
Source: PubMed Central journal article supplement (PMC9555627; doi:10.1371/journal.pone.0266861), 2022-10-12
Supplement: pone.0266861.s004.pdf [file pone.0266861.s004.pdf]

Supplement 3: S3\_Two\_Way\_Statistical\_Output. Bold indicates p<0.05.  $\eta^2$  values only presented for p<0.05.

| Weight                       | Genotype |               |               | Sex      |              |              |
|------------------------------|----------|---------------|---------------|----------|--------------|--------------|
|                              | F [1,27] | p-value       | $\eta^2$      | F [1,27] | p-value      | $\eta^2$     |
| BODY WEIGHT (g)              | 1.977    | 0.171         |               | 105.604  | <b>0.000</b> | <b>0.796</b> |
| BRAIN WEIGHT (mg)            | 22.339   | <b>0.000</b>  | <b>0.365</b>  | 6.282    | <b>0.018</b> | <b>0.155</b> |
| Rotarod                      | Genotype |               |               | Sex      |              |              |
|                              | F [1,27] | p-value       | $\eta^2$      | F [1,27] | p-value      | $\eta^2$     |
| Day 1 Average                | 0.000    | 0.991         |               | 1.903    | 0.179        |              |
| Day 2 Average                | 0.000    | 0.984         |               | 0.976    | 0.332        |              |
| Day 3 Average                | 0.333    | 0.569         |               | 9.393    | <b>0.005</b> | <b>0.258</b> |
| Open Field Analysis          | Genotype |               |               | Sex      |              |              |
|                              | F [1,54] | p-value       | $\eta^2$      | F [1,54] | p-value      | $\eta^2$     |
| Total Ambulatory Distance    | 7.885    | <b>0.007</b>  | <b>0.127</b>  | 2.329    | 0.133        |              |
| % Distance Center            | 53.193   | <b>0.000</b>  | <b>0.496</b>  | 0.133    | 0.717        |              |
| % Time Center                | 6.991    | <b>0.011</b>  | <b>0.115</b>  | 0.017    | 0.898        |              |
| Total Vertical Counts        | 6.592    | <b>0.013</b>  | <b>0.109</b>  | 7.130    | 0.010        | <b>0.117</b> |
| Elevated Zero Maze           | Genotype |               |               | Sex      |              |              |
|                              | F [1,22] | p-value       | $\eta^2$      | F [1,22] | p-value      | $\eta^2$     |
| Distance (Total)             | 0.326    | 0.574         |               | 0.069    | 0.796        |              |
| % Distance Open              | 9.838    | <b>0.005</b>  | <b>0.309</b>  | 0.000    | 0.988        |              |
| % Time Open                  | 1.027    | 0.322         |               | 0.001    | 0.979        |              |
| Gait                         | Genotype |               |               | Sex      |              |              |
|                              | F [1,53] | p-value       | $\eta^2$      | F [1,53] | p-value      | $\eta^2$     |
| Forepaw Stride (ms)          | 2.840    | 0.098         |               | 1.174    | 0.283        |              |
| Forepaw % Swing              | 7.183    | <b>0.010</b>  | <b>0.119</b>  | 0.743    | 0.393        |              |
| Forepaw Stride Length (mm)   | 1.862    | 0.178         |               | 1.978    | 0.165        |              |
| Forepaw Print Area           | 6.647    | <b>0.013</b>  | <b>0.111</b>  | 5.726    | <b>0.020</b> | <b>0.098</b> |
| Hindpaw Stride (ms)          | 0.031    | 0.861         |               | 0.283    | 0.597        |              |
| Hindpaw % Swing              | 11.770   | <b>0.001</b>  | <b>0.182</b>  | 1.943    | 0.169        |              |
| Hindpaw Stride Length (mm)   | 5.476    | <b>0.023</b>  | <b>0.094</b>  | 0.384    | 0.538        |              |
| Hindpaw Print Area           | 4.269    | <b>0.044</b>  | <b>0.075</b>  | 0.013    | 0.909        |              |
| Front Track Width (mm)       | 0.041    | 0.840         |               | 1.217    | 0.275        |              |
| Rear Track Width (mm)        | 4.417    | <b>0.040</b>  | <b>0.077</b>  | 4.275    | <b>0.044</b> | <b>0.075</b> |
| Overall Avg Run Speed (mm/s) | 1.223    | 0.274         |               | 0.324    | 0.571        |              |
| Forepaw Homolateral Coupling | 3.611    | 0.063         |               | 1.446    | 0.235        |              |
| Forepaw Homologous Coupling  | 0.487    | 0.488         |               | 2.418    | 0.126        |              |
| Forepaw Diagonal Coupling    | 1.601    | 0.211         |               | 0.590    | 0.446        |              |
| Hindpaw Homolateral Coupling | 6.952    | <b>0.011</b>  | <b>0.116</b>  | 0.211    | 0.648        |              |
| Hindpaw Homologous Coupling  | 5.392    | <b>0.024</b>  | <b>0.092</b>  | 0.258    | 0.614        |              |
| Hindpaw Diagonal Coupling    | 0.547    | 0.463         |               | 0.088    | 0.768        |              |
| Forepaw Gait Angle           | 0.202    | 0.655         |               | 0.431    | 0.514        |              |
| Hindpaw Gait Angle           | 0.390    | 0.535         |               | 0.249    | 0.620        |              |
| Body Rotation (deg)          | 10.529   | <b>0.002</b>  | <b>0.166</b>  | 0.056    | 0.814        |              |
| Longitudinal Position (mm)   | 0.426    | 0.517         |               | 0.538    | 0.466        |              |
| Lateral Position (mm)        | 0.127    | 0.722         |               | 0.140    | 0.710        |              |
| Fear Conditioning            | Genotype |               |               | Sex      |              |              |
|                              | F [1,27] | p-value       | $\eta^2$      | F [1,27] | p-value      | $\eta^2$     |
| Pre-stim                     | 13.365   | <b>0.001</b>  | <b>0.331</b>  | 1.621    | 0.214        |              |
| Context-Prestim              | 25.566   | <b>0.000</b>  | <b>0.486</b>  | 0.202    | 0.657        |              |
| Cue-Prestim                  | 26.588   | <b>0.000</b>  | <b>0.496</b>  | 1.355    | 0.255        |              |
| Marble Burying               | Genotype |               |               | Sex      |              |              |
|                              | F [1,27] | p-value       | $\eta^2$      | F [1,27] | p-value      | $\eta^2$     |
| Marble (% burried)           | 4.782    | <b>0.038</b>  | <b>0.150</b>  | 0.402    | 0.531        |              |
| Tube test                    | Genotype |               |               | Sex      |              |              |
|                              | F [1,27] | p-value       | $\eta^2$      | F [1,27] | p-value      | $\eta^2$     |
| Avg wins                     | 7.105    | <b>0.013</b>  | <b>0.208</b>  | 2.150    | 0.154        |              |
| Nest Building                | Genotype |               |               | Sex      |              |              |
|                              | F [1,27] | p-value       | $\eta^2$      | F [1,27] | p-value      | $\eta^2$     |
| Nest Score                   | 6.5757   | <b>0.0162</b> | <b>0.1958</b> | 0.0073   | 0.9324       |              |
| % shredded                   | 4.0349   | 0.0547        |               | 0.1244   | 0.7270       |              |
| 3 Chamber                    | Genotype |               |               | Sex      |              |              |
|                              | F [1,24] | p-value       | $\eta^2$      | F [1,24] | p-value      | $\eta^2$     |
| Social Index Cup             | 4.071    | 0.055         |               | 0.836    | 0.370        |              |
| Social Index Chamber         | 4.684    | <b>0.041</b>  | <b>0.163</b>  | 0.182    | 0.674        |              |
| Novelty Index Cup            | 3.201    | 0.086         |               | 0.011    | 0.916        |              |
| Novelty Index Chamber        | 4.905    | <b>0.037</b>  | <b>0.170</b>  | 1.046    | 0.317        |              |
