# Supplementary material for: Behavioral and brain anatomical analysis of Foxg1 heterozygous mice
Source: PubMed Central journal article supplement (PMC9555627; doi:10.1371/journal.pone.0266861), 2022-10-12
Supplement: pone.0266861.s005.pdf [file pone.0266861.s005.pdf]

### **Supplement S4\_SPSS\_Statistical Output**

The full output of the statistical analysis performed in SPSS follows, with title sheets indicating the specific behavioral measure output on subsequent pages.

## **Weights (Body and Brain)**

```

UNIANOVA BODYWEIGHTg BY GENOTYPE SEX
/METHOD=SSTYPE(3)
/INTERCEPT=INCLUDE
/CRITERIA=ALPHA(0.05)
/DESIGN=GENOTYPE SEX GENOTYPE*SEX.

```

## Univariate Analysis of Variance

### Notes

|                        |                                |                                                                                                                                                             |
|------------------------|--------------------------------|-------------------------------------------------------------------------------------------------------------------------------------------------------------|
| Output Created         |                                | 22-AUG-2022 19:43:...                                                                                                                                       |
| Comments               |                                |                                                                                                                                                             |
| Input                  | Data                           | /Users/jeffneul/Jeff's Research/Neul Manuscripts/FoxG1/June_Aug 2022 stat sex and effect size/SPSS files/SPSS Data Files/Aug 2022 BrainBodyWT.sav           |
|                        | Active Dataset                 | DataSet2                                                                                                                                                    |
|                        | Filter                         | <none>                                                                                                                                                      |
|                        | Weight                         | <none>                                                                                                                                                      |
|                        | Split File                     | <none>                                                                                                                                                      |
|                        | N of Rows in Working Data File | 34                                                                                                                                                          |
| Missing Value Handling | Definition of Missing          | User-defined missing values are treated as missing.                                                                                                         |
|                        | Cases Used                     | Statistics are based on all cases with valid data for all variables in the model.                                                                           |
| Syntax                 |                                | UNIANOVA<br>BODYWEIGHTg BY<br>GENOTYPE SEX<br>/METHOD=SSTYPE(3)<br>/INTERCEPT=INCLUDE<br>/CRITERIA=ALPHA<br>(0.05)<br>/DESIGN=GENOTYPE<br>SEX GENOTYPE*SEX. |
| Resources              | Processor Time                 | 00:00:00.01                                                                                                                                                 |
|                        | Elapsed Time                   | 00:00:00.00                                                                                                                                                 |

## Between-Subjects Factors

|          |    | N  |
|----------|----|----|
| GENOTYPE | KI | 15 |
|          | WT | 15 |
| SEX      | F  | 14 |
|          | M  | 16 |

## Tests of Between-Subjects Effects

Dependent Variable: BODY WEIGHT (g)

| Source          | Type III Sum of Squares | df | Mean Square | F        | Sig.  |
|-----------------|-------------------------|----|-------------|----------|-------|
| Corrected Model | 186.783 <sup>a</sup>    | 3  | 62.261      | 36.222   | <.001 |
| Intercept       | 14010.728               | 1  | 14010.728   | 8151.175 | <.001 |
| GENOTYPE        | 3.069                   | 1  | 3.069       | 1.785    | .193  |
| SEX             | 181.634                 | 1  | 181.634     | 105.671  | <.001 |
| GENOTYPE * SEX  | 1.749                   | 1  | 1.749       | 1.017    | .322  |
| Error           | 44.690                  | 26 | 1.719       |          |       |
| Total           | 14519.210               | 30 |             |          |       |
| Corrected Total | 231.474                 | 29 |             |          |       |

a. R Squared = .807 (Adjusted R Squared = .785)

```
UNIANOVA BRAINWEIGHTmg BY GENOTYPE SEX
/METHOD=SSTYPE(3)
/INTERCEPT=INCLUDE
/CRITERIA=ALPHA(0.05)
/DESIGN=GENOTYPE SEX GENOTYPE*SEX.
```

## Univariate Analysis of Variance

## Notes

|                        |                                |                                                                                                                                                               |
|------------------------|--------------------------------|---------------------------------------------------------------------------------------------------------------------------------------------------------------|
| Output Created         |                                | 22-AUG-2022 19:43:...                                                                                                                                         |
| Comments               |                                |                                                                                                                                                               |
| Input                  | Data                           | /Users/jeffneul/Jeff's Research/Neul Manuscripts/FoxG1/June _Aug 2022 stat sex and effect size/SPSS files/SPSS Data Files/Aug 2022 BrainBodyWT.sav            |
|                        | Active Dataset                 | DataSet2                                                                                                                                                      |
|                        | Filter                         | <none>                                                                                                                                                        |
|                        | Weight                         | <none>                                                                                                                                                        |
|                        | Split File                     | <none>                                                                                                                                                        |
|                        | N of Rows in Working Data File | 34                                                                                                                                                            |
| Missing Value Handling | Definition of Missing          | User-defined missing values are treated as missing.                                                                                                           |
|                        | Cases Used                     | Statistics are based on all cases with valid data for all variables in the model.                                                                             |
| Syntax                 |                                | UNIANOVA<br>BRAINWEIGHTmg BY<br>GENOTYPE SEX<br>/METHOD=SSTYPE(3)<br>/INTERCEPT=INCLUDE<br>/CRITERIA=ALPHA<br>(0.05)<br>/DESIGN=GENOTYPE<br>SEX GENOTYPE*SEX. |
| Resources              | Processor Time                 | 00:00:00.01                                                                                                                                                   |
|                        | Elapsed Time                   | 00:00:00.00                                                                                                                                                   |

### Between-Subjects Factors

|          |    | N  |
|----------|----|----|
| GENOTYPE | KI | 17 |
|          | WT | 17 |
| SEX      | F  | 14 |
|          | M  | 20 |

## Tests of Between-Subjects Effects

Dependent Variable: BRAIN WEIGHT (mg)

| Source          | Type III Sum of Squares | df | Mean Square | F         | Sig.  |
|-----------------|-------------------------|----|-------------|-----------|-------|
| Corrected Model | 10302.897 <sup>a</sup>  | 3  | 3434.299    | 9.561     | <.001 |
| Intercept       | 6328113.52              | 1  | 6328113.52  | 17617.164 | <.001 |
| GENOTYPE        | 8076.507                | 1  | 8076.507    | 22.485    | <.001 |
| SEX             | 2220.950                | 1  | 2220.950    | 6.183     | .019  |
| GENOTYPE * SEX  | 183.969                 | 1  | 183.969     | .512      | .480  |
| Error           | 10776.048               | 30 | 359.202     |           |       |
| Total           | 6509480.94              | 34 |             |           |       |
| Corrected Total | 21078.945               | 33 |             |           |       |

a. R Squared = .489 (Adjusted R Squared = .438)

```
UNIANOVA BODYWEIGHTg BY GENOTYPE SEX
/METHOD=SSTYPE(3)
/INTERCEPT=INCLUDE
/EMMEANS=TABLES(GENOTYPE)
/EMMEANS=TABLES(SEX)
/CRITERIA=ALPHA(0.05)
/DESIGN=GENOTYPE SEX.
```

## Univariate Analysis of Variance

## Notes

|                        |                                |                                                                                                                                                                                      |
|------------------------|--------------------------------|--------------------------------------------------------------------------------------------------------------------------------------------------------------------------------------|
| Output Created         |                                | 22-AUG-2022 19:44:...                                                                                                                                                                |
| Comments               |                                |                                                                                                                                                                                      |
| Input                  | Data                           | /Users/jeffneul/Jeff's Research/Neul Manuscripts/FoxG1/June _Aug 2022 stat sex and effect size/SPSS files/SPSS Data Files/Aug 2022 BrainBodyWT.sav                                   |
|                        | Active Dataset                 | DataSet2                                                                                                                                                                             |
|                        | Filter                         | <none>                                                                                                                                                                               |
|                        | Weight                         | <none>                                                                                                                                                                               |
|                        | Split File                     | <none>                                                                                                                                                                               |
|                        | N of Rows in Working Data File | 34                                                                                                                                                                                   |
| Missing Value Handling | Definition of Missing          | User-defined missing values are treated as missing.                                                                                                                                  |
|                        | Cases Used                     | Statistics are based on all cases with valid data for all variables in the model.                                                                                                    |
| Syntax                 |                                | <pre> UNIANOVA BODYWEIGHTg BY GENOTYPE SEX /METHOD=SSTYPE(3) /INTERCEPT=INCLUDE /EMMEANS=TABLES (GENOTYPE) /EMMEANS=TABLES (SEX) /CRITERIA=ALPHA (0.05) /DESIGN=GENOTYPE SEX. </pre> |
| Resources              | Processor Time                 | 00:00:00.01                                                                                                                                                                          |
|                        | Elapsed Time                   | 00:00:00.00                                                                                                                                                                          |

### Between-Subjects Factors

|          |    | N  |
|----------|----|----|
| GENOTYPE | KI | 15 |
|          | WT | 15 |
| SEX      | F  | 14 |
|          | M  | 16 |

## Tests of Between-Subjects Effects

Dependent Variable: BODY WEIGHT (g)

| Source          | Type III Sum of Squares | df | Mean Square | F        | Sig.  |
|-----------------|-------------------------|----|-------------|----------|-------|
| Corrected Model | 185.035 <sup>a</sup>    | 2  | 92.517      | 53.790   | <.001 |
| Intercept       | 14010.728               | 1  | 14010.728   | 8145.956 | <.001 |
| GENOTYPE        | 3.400                   | 1  | 3.400       | 1.977    | .171  |
| SEX             | 181.634                 | 1  | 181.634     | 105.604  | <.001 |
| Error           | 46.439                  | 27 | 1.720       |          |       |
| Total           | 14519.210               | 30 |             |          |       |
| Corrected Total | 231.474                 | 29 |             |          |       |

a. R Squared = .799 (Adjusted R Squared = .785)

## Estimated Marginal Means

### 1. GENOTYPE

Dependent Variable: BODY WEIGHT (g)

| GENOTYPE | Mean   | Std. Error | 95% Confidence Interval |             |
|----------|--------|------------|-------------------------|-------------|
|          |        |            | Lower Bound             | Upper Bound |
| KI       | 21.996 | .339       | 21.300                  | 22.691      |
| WT       | 21.322 | .339       | 20.627                  | 22.018      |

### 2. SEX

Dependent Variable: BODY WEIGHT (g)

| SEX | Mean   | Std. Error | 95% Confidence Interval |             |
|-----|--------|------------|-------------------------|-------------|
|     |        |            | Lower Bound             | Upper Bound |
| F   | 19.193 | .351       | 18.474                  | 19.912      |
| M   | 24.125 | .328       | 23.452                  | 24.798      |

```
UNIANOVA BRAINWEIGHTmg BY GENOTYPE SEX
/METHOD=SSTYPE(3)
/INTERCEPT=INCLUDE
/EMMEANS=TABLES(GENOTYPE)
/EMMEANS=TABLES(SEX)
/CRITERIA=ALPHA(0.05)
/DESIGN=GENOTYPE SEX.
```

## Univariate Analysis of Variance



## Notes

|                        |                                |                                                                                                                                                                                        |
|------------------------|--------------------------------|----------------------------------------------------------------------------------------------------------------------------------------------------------------------------------------|
| Output Created         |                                | 22-AUG-2022 19:49:...                                                                                                                                                                  |
| Comments               |                                |                                                                                                                                                                                        |
| Input                  | Data                           | /Users/jeffneul/Jeff's Research/Neul Manuscripts/FoxG1/June_Aug 2022 stat sex and effect size/SPSS files/SPSS Data Files/Aug 2022 BrainBodyWT.sav                                      |
|                        | Active Dataset                 | DataSet2                                                                                                                                                                               |
|                        | Filter                         | <none>                                                                                                                                                                                 |
|                        | Weight                         | <none>                                                                                                                                                                                 |
|                        | Split File                     | <none>                                                                                                                                                                                 |
|                        | N of Rows in Working Data File | 34                                                                                                                                                                                     |
| Missing Value Handling | Definition of Missing          | User-defined missing values are treated as missing.                                                                                                                                    |
|                        | Cases Used                     | Statistics are based on all cases with valid data for all variables in the model.                                                                                                      |
| Syntax                 |                                | <pre> UNIANOVA BRAINWEIGHTmg BY GENOTYPE SEX /METHOD=SSTYPE(3) /INTERCEPT=INCLUDE /EMMEANS=TABLES (GENOTYPE) /EMMEANS=TABLES (SEX) /CRITERIA=ALPHA (0.05) /DESIGN=GENOTYPE SEX. </pre> |
| Resources              | Processor Time                 | 00:00:00.01                                                                                                                                                                            |
|                        | Elapsed Time                   | 00:00:00.00                                                                                                                                                                            |

### Between-Subjects Factors

|          |    | N  |
|----------|----|----|
| GENOTYPE | KI | 17 |
|          | WT | 17 |
| SEX      | F  | 14 |
|          | M  | 20 |

## Tests of Between-Subjects Effects

Dependent Variable: BRAIN WEIGHT (mg)

| Source          | Type III Sum of Squares | df | Mean Square | F         | Sig.  |
|-----------------|-------------------------|----|-------------|-----------|-------|
| Corrected Model | 10118.928 <sup>a</sup>  | 2  | 5059.464    | 14.311    | <.001 |
| Intercept       | 6328113.52              | 1  | 6328113.52  | 17898.833 | <.001 |
| GENOTYPE        | 7897.978                | 1  | 7897.978    | 22.339    | <.001 |
| SEX             | 2220.950                | 1  | 2220.950    | 6.282     | .018  |
| Error           | 10960.017               | 31 | 353.549     |           |       |
| Total           | 6509480.94              | 34 |             |           |       |
| Corrected Total | 21078.945               | 33 |             |           |       |

a. R Squared = .480 (Adjusted R Squared = .447)

## Estimated Marginal Means

### 1. GENOTYPE

Dependent Variable: BRAIN WEIGHT (mg)

| GENOTYPE | Mean    | Std. Error | 95% Confidence Interval |             |
|----------|---------|------------|-------------------------|-------------|
|          |         |            | Lower Bound             | Upper Bound |
| KI       | 423.055 | 4.597      | 413.680                 | 432.430     |
| WT       | 453.537 | 4.597      | 444.162                 | 462.913     |

### 2. SEX

Dependent Variable: BRAIN WEIGHT (mg)

| SEX | Mean    | Std. Error | 95% Confidence Interval |             |
|-----|---------|------------|-------------------------|-------------|
|     |         |            | Lower Bound             | Upper Bound |
| F   | 446.507 | 5.025      | 436.258                 | 456.756     |
| M   | 430.085 | 4.204      | 421.510                 | 438.660     |

**Rotarod**

```

UNIANOVA Day1Average BY SEX GENOTYPE
/METHOD=SSTYPE(3)
/INTERCEPT=INCLUDE
/CRITERIA=ALPHA(.05)
/DESIGN=SEX GENOTYPE GENOTYPE*SEX.

```

## Univariate Analysis of Variance

### Notes

|                        |                                |                                                                                                                                                   |
|------------------------|--------------------------------|---------------------------------------------------------------------------------------------------------------------------------------------------|
| Output Created         |                                | 19-AUG-2022 11:51:...                                                                                                                             |
| Comments               |                                |                                                                                                                                                   |
| Input                  | Data                           | /Users/jeffneul/Jeff's Research/Neul Manuscripts/FoxG1/June 2022 stat sex and effect size/SPSS files/SPSS Data Files/June 2022 RR sex EF data.sav |
|                        | Active Dataset                 | DataSet1                                                                                                                                          |
|                        | Filter                         | <none>                                                                                                                                            |
|                        | Weight                         | <none>                                                                                                                                            |
|                        | Split File                     | <none>                                                                                                                                            |
|                        | N of Rows in Working Data File | 30                                                                                                                                                |
| Missing Value Handling | Definition of Missing          | User-defined missing values are treated as missing.                                                                                               |
|                        | Cases Used                     | Statistics are based on all cases with valid data for all variables in the model.                                                                 |
| Syntax                 |                                | UNIANOVA Day1Average BY SEX GENOTYPE /METHOD=SSTYPE(3) /INTERCEPT=INCLUDE /CRITERIA=ALPHA(.05) /DESIGN=SEX GENOTYPE GENOTYPE*SEX.                 |
| Resources              | Processor Time                 | 00:00:00.01                                                                                                                                       |
|                        | Elapsed Time                   | 00:00:00.00                                                                                                                                       |

```

[DataSet1] /Users/jeffneul/Jeff's Research/Neul Manuscripts/FoxG1/June 2022 st
at sex and effect size/SPSS files/SPSS Data Files/June 2022 RR sex EF data.sav

```

## Between-Subjects Factors

|          |    | N  |
|----------|----|----|
| SEX      | F  | 14 |
|          | M  | 16 |
| GENOTYPE | KI | 15 |
|          | WT | 15 |

## Tests of Between-Subjects Effects

Dependent Variable: Day 1 Average

| Source          | Type III Sum of Squares | df | Mean Square | F       | Sig.  |
|-----------------|-------------------------|----|-------------|---------|-------|
| Corrected Model | 8916.031 <sup>a</sup>   | 3  | 2972.010    | .611    | .614  |
| Intercept       | 1055841.44              | 1  | 1055841.44  | 217.186 | <.001 |
| SEX             | 8908.680                | 1  | 8908.680    | 1.833   | .187  |
| GENOTYPE        | .343                    | 1  | .343        | .000    | .993  |
| SEX * GENOTYPE  | 6.772                   | 1  | 6.772       | .001    | .971  |
| Error           | 126398.107              | 26 | 4861.466    |         |       |
| Total           | 1208898.03              | 30 |             |         |       |
| Corrected Total | 135314.138              | 29 |             |         |       |

a. R Squared = .066 (Adjusted R Squared = -.042)

```
UNIANOVA Day2Average BY SEX GENOTYPE
/METHOD=SSTYPE(3)
/INTERCEPT=INCLUDE
/CRITERIA=ALPHA(.05)
/DESIGN=SEX GENOTYPE GENOTYPE*SEX.
```

## Univariate Analysis of Variance

## Notes

|                        |                                |                                                                                                                                                   |
|------------------------|--------------------------------|---------------------------------------------------------------------------------------------------------------------------------------------------|
| Output Created         |                                | 19-AUG-2022 11:52:...                                                                                                                             |
| Comments               |                                |                                                                                                                                                   |
| Input                  | Data                           | /Users/jeffneul/Jeff's Research/Neul Manuscripts/FoxG1/June 2022 stat sex and effect size/SPSS files/SPSS Data Files/June 2022 RR sex EF data.sav |
|                        | Active Dataset                 | DataSet1                                                                                                                                          |
|                        | Filter                         | <none>                                                                                                                                            |
|                        | Weight                         | <none>                                                                                                                                            |
|                        | Split File                     | <none>                                                                                                                                            |
|                        | N of Rows in Working Data File | 30                                                                                                                                                |
| Missing Value Handling | Definition of Missing          | User-defined missing values are treated as missing.                                                                                               |
|                        | Cases Used                     | Statistics are based on all cases with valid data for all variables in the model.                                                                 |
| Syntax                 |                                | UNIANOVA Day2Average BY SEX GENOTYPE /METHOD=SSTYPE(3) /INTERCEPT=INCLUDE /CRITERIA=ALPHA(.05) /DESIGN=SEX GENOTYPE GENOTYPE*SEX.                 |
| Resources              | Processor Time                 | 00:00:00.01                                                                                                                                       |
|                        | Elapsed Time                   | 00:00:00.00                                                                                                                                       |

### Between-Subjects Factors

|          |    | N  |
|----------|----|----|
| SEX      | F  | 14 |
|          | M  | 16 |
| GENOTYPE | KI | 15 |
|          | WT | 15 |

## Tests of Between-Subjects Effects

Dependent Variable: Day 2 Average

| Source          | Type III Sum of Squares | df | Mean Square | F       | Sig.  |
|-----------------|-------------------------|----|-------------|---------|-------|
| Corrected Model | 4820.426 <sup>a</sup>   | 3  | 1606.809    | .534    | .663  |
| Intercept       | 1458875.03              | 1  | 1458875.03  | 485.153 | <.001 |
| SEX             | 2894.938                | 1  | 2894.938    | .963    | .336  |
| GENOTYPE        | 16.140                  | 1  | 16.140      | .005    | .942  |
| SEX * GENOTYPE  | 1924.288                | 1  | 1924.288    | .640    | .431  |
| Error           | 78183.115               | 26 | 3007.043    |         |       |
| Total           | 1539700.67              | 30 |             |         |       |
| Corrected Total | 83003.541               | 29 |             |         |       |

a. R Squared = .058 (Adjusted R Squared = -.051)

```
UNIANOVA Day3Average BY SEX GENOTYPE
/METHOD=SSTYPE(3)
/INTERCEPT=INCLUDE
/CRITERIA=ALPHA(.05)
/DESIGN=SEX GENOTYPE GENOTYPE*SEX.
```

## Univariate Analysis of Variance

## Notes

|                        |                                |                                                                                                                                                   |
|------------------------|--------------------------------|---------------------------------------------------------------------------------------------------------------------------------------------------|
| Output Created         |                                | 19-AUG-2022 11:52:...                                                                                                                             |
| Comments               |                                |                                                                                                                                                   |
| Input                  | Data                           | /Users/jeffneul/Jeff's Research/Neul Manuscripts/FoxG1/June 2022 stat sex and effect size/SPSS files/SPSS Data Files/June 2022 RR sex EF data.sav |
|                        | Active Dataset                 | DataSet1                                                                                                                                          |
|                        | Filter                         | <none>                                                                                                                                            |
|                        | Weight                         | <none>                                                                                                                                            |
|                        | Split File                     | <none>                                                                                                                                            |
|                        | N of Rows in Working Data File | 30                                                                                                                                                |
| Missing Value Handling | Definition of Missing          | User-defined missing values are treated as missing.                                                                                               |
|                        | Cases Used                     | Statistics are based on all cases with valid data for all variables in the model.                                                                 |
| Syntax                 |                                | UNIANOVA Day3Average BY SEX GENOTYPE /METHOD=SSTYPE(3) /INTERCEPT=INCLUDE /CRITERIA=ALPHA(.05) /DESIGN=SEX GENOTYPE GENOTYPE*SEX.                 |
| Resources              | Processor Time                 | 00:00:00.01                                                                                                                                       |
|                        | Elapsed Time                   | 00:00:00.00                                                                                                                                       |

### Between-Subjects Factors

|          |    | N  |
|----------|----|----|
| SEX      | F  | 14 |
|          | M  | 16 |
| GENOTYPE | KI | 15 |
|          | WT | 15 |



## Tests of Between-Subjects Effects

Dependent Variable: Day 3 Average

| Source          | Type III Sum of Squares | df | Mean Square | F       | Sig.  |
|-----------------|-------------------------|----|-------------|---------|-------|
| Corrected Model | 25689.412 <sup>a</sup>  | 3  | 8563.137    | 3.549   | .028  |
| Intercept       | 1685785.74              | 1  | 1685785.74  | 698.720 | <.001 |
| SEX             | 22613.564               | 1  | 22613.564   | 9.373   | .005  |
| GENOTYPE        | 627.815                 | 1  | 627.815     | .260    | .614  |
| SEX * GENOTYPE  | 2275.015                | 1  | 2275.015    | .943    | .340  |
| Error           | 62729.629               | 26 | 2412.678    |         |       |
| Total           | 1755682.33              | 30 |             |         |       |
| Corrected Total | 88419.041               | 29 |             |         |       |

a. R Squared = .291 (Adjusted R Squared = .209)

```

UNIANOVA Day1Average BY SEX GENOTYPE
/METHOD=SSTYPE(3)
/INTERCEPT=INCLUDE
/EMMEANS=TABLES(SEX)
/EMMEANS=TABLES(GENOTYPE)
/PRINT ETASQ
/CRITERIA=ALPHA(.05)
/DESIGN=SEX GENOTYPE.
    
```

## Univariate Analysis of Variance

## Notes

|                        |                                |                                                                                                                                                                                    |
|------------------------|--------------------------------|------------------------------------------------------------------------------------------------------------------------------------------------------------------------------------|
| Output Created         |                                | 19-AUG-2022 11:55:...                                                                                                                                                              |
| Comments               |                                |                                                                                                                                                                                    |
| Input                  | Data                           | /Users/jeffneul/Jeff's Research/Neul Manuscripts/FoxG1/June 2022 stat sex and effect size/SPSS files/SPSS Data Files/June 2022 RR sex EF data.sav                                  |
|                        | Active Dataset                 | DataSet1                                                                                                                                                                           |
|                        | Filter                         | <none>                                                                                                                                                                             |
|                        | Weight                         | <none>                                                                                                                                                                             |
|                        | Split File                     | <none>                                                                                                                                                                             |
|                        | N of Rows in Working Data File | 30                                                                                                                                                                                 |
| Missing Value Handling | Definition of Missing          | User-defined missing values are treated as missing.                                                                                                                                |
|                        | Cases Used                     | Statistics are based on all cases with valid data for all variables in the model.                                                                                                  |
| Syntax                 |                                | UNIANOVA Day1Average BY SEX GENOTYPE /METHOD=SSTYPE(3) /INTERCEPT=INCLUDE /EMMEANS=TABLES (SEX) /EMMEANS=TABLES (GENOTYPE) /PRINT ETASQ /CRITERIA=ALPHA(.05) /DESIGN=SEX GENOTYPE. |
| Resources              | Processor Time                 | 00:00:00.01                                                                                                                                                                        |
|                        | Elapsed Time                   | 00:00:00.00                                                                                                                                                                        |

### Between-Subjects Factors

|          |    | N  |
|----------|----|----|
| SEX      | F  | 14 |
|          | M  | 16 |
| GENOTYPE | KI | 15 |
|          | WT | 15 |

## Tests of Between-Subjects Effects

Dependent Variable: Day 1 Average

| Source          | Type III Sum of Squares | df | Mean Square | F       | Sig.  | Partial Eta Squared |
|-----------------|-------------------------|----|-------------|---------|-------|---------------------|
| Corrected Model | 8909.258 <sup>a</sup>   | 2  | 4454.629    | .952    | .399  | .066                |
| Intercept       | 1055841.44              | 1  | 1055841.44  | 225.527 | <.001 | .893                |
| SEX             | 8908.680                | 1  | 8908.680    | 1.903   | .179  | .066                |
| GENOTYPE        | .579                    | 1  | .579        | .000    | .991  | .000                |
| Error           | 126404.880              | 27 | 4681.662    |         |       |                     |
| Total           | 1208898.03              | 30 |             |         |       |                     |
| Corrected Total | 135314.138              | 29 |             |         |       |                     |

a. R Squared = .066 (Adjusted R Squared = -.003)

## Estimated Marginal Means

### 1. SEX

Dependent Variable: Day 1 Average

| SEX | Mean    | Std. Error | 95% Confidence Interval |             |
|-----|---------|------------|-------------------------|-------------|
|     |         |            | Lower Bound             | Upper Bound |
| F   | 170.750 | 18.287     | 133.229                 | 208.271     |
| M   | 205.292 | 17.106     | 170.194                 | 240.390     |

### 2. GENOTYPE

Dependent Variable: Day 1 Average

| GENOTYPE | Mean    | Std. Error | 95% Confidence Interval |             |
|----------|---------|------------|-------------------------|-------------|
|          |         |            | Lower Bound             | Upper Bound |
| KI       | 188.160 | 17.686     | 151.870                 | 224.449     |
| WT       | 187.882 | 17.686     | 151.593                 | 224.171     |

```
UNIANOVA Day2Average BY SEX GENOTYPE
/METHOD=SSTYPE(3)
/INTERCEPT=INCLUDE
/EMMEANS=TABLES(SEX)
/EMMEANS=TABLES(GENOTYPE)
/PRINT ETASQ
/CRITERIA=ALPHA(.05)
/DESIGN=SEX GENOTYPE.
```

## Univariate Analysis of Variance

## Notes

|                        |                                |                                                                                                                                                                                    |
|------------------------|--------------------------------|------------------------------------------------------------------------------------------------------------------------------------------------------------------------------------|
| Output Created         |                                | 19-AUG-2022 11:55:...                                                                                                                                                              |
| Comments               |                                |                                                                                                                                                                                    |
| Input                  | Data                           | /Users/jeffneul/Jeff's Research/Neul Manuscripts/FoxG1/June 2022 stat sex and effect size/SPSS files/SPSS Data Files/June 2022 RR sex EF data.sav                                  |
|                        | Active Dataset                 | DataSet1                                                                                                                                                                           |
|                        | Filter                         | <none>                                                                                                                                                                             |
|                        | Weight                         | <none>                                                                                                                                                                             |
|                        | Split File                     | <none>                                                                                                                                                                             |
|                        | N of Rows in Working Data File | 30                                                                                                                                                                                 |
| Missing Value Handling | Definition of Missing          | User-defined missing values are treated as missing.                                                                                                                                |
|                        | Cases Used                     | Statistics are based on all cases with valid data for all variables in the model.                                                                                                  |
| Syntax                 |                                | UNIANOVA Day2Average BY SEX GENOTYPE /METHOD=SSTYPE(3) /INTERCEPT=INCLUDE /EMMEANS=TABLES (SEX) /EMMEANS=TABLES (GENOTYPE) /PRINT ETASQ /CRITERIA=ALPHA(.05) /DESIGN=SEX GENOTYPE. |
| Resources              | Processor Time                 | 00:00:00.02                                                                                                                                                                        |
|                        | Elapsed Time                   | 00:00:00.00                                                                                                                                                                        |

### Between-Subjects Factors

|          |    | N  |
|----------|----|----|
| SEX      | F  | 14 |
|          | M  | 16 |
| GENOTYPE | KI | 15 |
|          | WT | 15 |

## Tests of Between-Subjects Effects

Dependent Variable: Day 2 Average

| Source          | Type III Sum of Squares | df | Mean Square | F       | Sig.  | Partial Eta Squared |
|-----------------|-------------------------|----|-------------|---------|-------|---------------------|
| Corrected Model | 2896.138 <sup>a</sup>   | 2  | 1448.069    | .488    | .619  | .035                |
| Intercept       | 1458875.03              | 1  | 1458875.03  | 491.710 | <.001 | .948                |
| SEX             | 2894.938                | 1  | 2894.938    | .976    | .332  | .035                |
| GENOTYPE        | 1.200                   | 1  | 1.200       | .000    | .984  | .000                |
| Error           | 80107.403               | 27 | 2966.941    |         |       |                     |
| Total           | 1539700.67              | 30 |             |         |       |                     |
| Corrected Total | 83003.541               | 29 |             |         |       |                     |

a. R Squared = .035 (Adjusted R Squared = -.037)

## Estimated Marginal Means

### 1. SEX

Dependent Variable: Day 2 Average

| SEX | Mean    | Std. Error | 95% Confidence Interval |             |
|-----|---------|------------|-------------------------|-------------|
|     |         |            | Lower Bound             | Upper Bound |
| F   | 230.857 | 14.558     | 200.987                 | 260.727     |
| M   | 211.167 | 13.617     | 183.226                 | 239.107     |

### 2. GENOTYPE

Dependent Variable: Day 2 Average

| GENOTYPE | Mean    | Std. Error | 95% Confidence Interval |             |
|----------|---------|------------|-------------------------|-------------|
|          |         |            | Lower Bound             | Upper Bound |
| KI       | 221.212 | 14.080     | 192.323                 | 250.101     |
| WT       | 220.812 | 14.080     | 191.923                 | 249.701     |

```
UNIANOVA Day3Average BY SEX GENOTYPE
/METHOD=SSTYPE(3)
/INTERCEPT=INCLUDE
/EMMEANS=TABLES(SEX)
/EMMEANS=TABLES(GENOTYPE)
/PRINT ETASQ
/CRITERIA=ALPHA(.05)
/DESIGN=SEX GENOTYPE.
```

## Univariate Analysis of Variance

## Notes

|                        |                                |                                                                                                                                                                                                 |
|------------------------|--------------------------------|-------------------------------------------------------------------------------------------------------------------------------------------------------------------------------------------------|
| Output Created         |                                | 19-AUG-2022 11:56:...                                                                                                                                                                           |
| Comments               |                                |                                                                                                                                                                                                 |
| Input                  | Data                           | /Users/jeffneul/Jeff's Research/Neul Manuscripts/FoxG1/June 2022 stat sex and effect size/SPSS files/SPSS Data Files/June 2022 RR sex EF data.sav                                               |
|                        | Active Dataset                 | DataSet1                                                                                                                                                                                        |
|                        | Filter                         | <none>                                                                                                                                                                                          |
|                        | Weight                         | <none>                                                                                                                                                                                          |
|                        | Split File                     | <none>                                                                                                                                                                                          |
|                        | N of Rows in Working Data File | 30                                                                                                                                                                                              |
| Missing Value Handling | Definition of Missing          | User-defined missing values are treated as missing.                                                                                                                                             |
|                        | Cases Used                     | Statistics are based on all cases with valid data for all variables in the model.                                                                                                               |
| Syntax                 |                                | <pre> UNIANOVA Day3Average BY SEX GENOTYPE /METHOD=SSTYPE(3) /INTERCEPT=INCLUDE /EMMEANS=TABLES (SEX) /EMMEANS=TABLES (GENOTYPE) /PRINT ETASQ /CRITERIA=ALPHA(.05) /DESIGN=SEX GENOTYPE. </pre> |
| Resources              | Processor Time                 | 00:00:00.02                                                                                                                                                                                     |
|                        | Elapsed Time                   | 00:00:00.00                                                                                                                                                                                     |

### Between-Subjects Factors

|          |    | N  |
|----------|----|----|
| SEX      | F  | 14 |
|          | M  | 16 |
| GENOTYPE | KI | 15 |
|          | WT | 15 |

## Tests of Between-Subjects Effects

Dependent Variable: Day 3 Average

| Source          | Type III Sum of Squares | df | Mean Square | F       | Sig.  | Partial Eta Squared |
|-----------------|-------------------------|----|-------------|---------|-------|---------------------|
| Corrected Model | 23414.397 <sup>a</sup>  | 2  | 11707.198   | 4.863   | .016  | .265                |
| Intercept       | 1685785.74              | 1  | 1685785.74  | 700.199 | <.001 | .963                |
| SEX             | 22613.564               | 1  | 22613.564   | 9.393   | .005  | .258                |
| GENOTYPE        | 800.833                 | 1  | 800.833     | .333    | .569  | .012                |
| Error           | 65004.644               | 27 | 2407.579    |         |       |                     |
| Total           | 1755682.33              | 30 |             |         |       |                     |
| Corrected Total | 88419.041               | 29 |             |         |       |                     |

a. R Squared = .265 (Adjusted R Squared = .210)

## Estimated Marginal Means

### 1. SEX

Dependent Variable: Day 3 Average

| SEX | Mean    | Std. Error | 95% Confidence Interval |             |
|-----|---------|------------|-------------------------|-------------|
|     |         |            | Lower Bound             | Upper Bound |
| F   | 265.095 | 13.114     | 238.188                 | 292.002     |
| M   | 210.063 | 12.267     | 184.893                 | 235.232     |

### 2. GENOTYPE

Dependent Variable: Day 3 Average

| GENOTYPE | Mean    | Std. Error | 95% Confidence Interval |             |
|----------|---------|------------|-------------------------|-------------|
|          |         |            | Lower Bound             | Upper Bound |
| KI       | 232.412 | 12.683     | 206.388                 | 258.436     |
| WT       | 242.746 | 12.683     | 216.722                 | 268.769     |

## **Open Field Analysis**



# Univariate Analysis of Variance

## Notes

|                        |                                |                                                                                                                                                                                |
|------------------------|--------------------------------|--------------------------------------------------------------------------------------------------------------------------------------------------------------------------------|
| Output Created         |                                | 19-AUG-2022 12:07:...                                                                                                                                                          |
| Comments               |                                |                                                                                                                                                                                |
| Input                  | Data                           | /Users/jeffneul/Jeff's Research/Neul Manuscripts/FoxG1/June 2022 stat sex and effect size/SPSS files/SPSS Data Files/June 2022 OFA sex EF data.sav                             |
|                        | Active Dataset                 | DataSet2                                                                                                                                                                       |
|                        | Filter                         | <none>                                                                                                                                                                         |
|                        | Weight                         | <none>                                                                                                                                                                         |
|                        | Split File                     | <none>                                                                                                                                                                         |
|                        | N of Rows in Working Data File | 57                                                                                                                                                                             |
| Missing Value Handling | Definition of Missing          | User-defined missing values are treated as missing.                                                                                                                            |
|                        | Cases Used                     | Statistics are based on all cases with valid data for all variables in the model.                                                                                              |
| Syntax                 |                                | UNIANOVA<br>TotalAmbulatoryDistance BY GENDER<br>GENOTYPE<br>/METHOD=SSTYPE(3)<br>/INTERCEPT=INCLUDE<br>/CRITERIA=ALPHA(.05)<br>/DESIGN=GENDER<br>GENOTYPE<br>GENDER*GENOTYPE. |
| Resources              | Processor Time                 | 00:00:00.01                                                                                                                                                                    |
|                        | Elapsed Time                   | 00:00:00.00                                                                                                                                                                    |

## Between-Subjects Factors

|          |    | N  |
|----------|----|----|
| GENDER   | F  | 28 |
|          | M  | 29 |
| GENOTYPE | KI | 31 |
|          | WT | 26 |

## Tests of Between-Subjects Effects

Dependent Variable: Total Ambulatory Distance

| Source            | Type III Sum of Squares | df | Mean Square | F       | Sig.  |
|-------------------|-------------------------|----|-------------|---------|-------|
| Corrected Model   | 14973286 <sup>a</sup>   | 3  | 4991095.18  | 3.451   | .023  |
| Intercept         | 998010650               | 1  | 998010650   | 690.018 | <.001 |
| GENDER            | 2997675.76              | 1  | 2997675.76  | 2.073   | .156  |
| GENOTYPE          | 11388810.0              | 1  | 11388810.0  | 7.874   | .007  |
| GENDER * GENOTYPE | 1210068.15              | 1  | 1210068.15  | .837    | .365  |
| Error             | 76656825.9              | 53 | 1446355.21  |         |       |
| Total             | 1.094E+9                | 57 |             |         |       |
| Corrected Total   | 91630111.4              | 56 |             |         |       |

a. R Squared = .163 (Adjusted R Squared = .116)

```
UNIANOVA DistanceCenter BY GENDER GENOTYPE
/METHOD=SSTYPE(3)
/INTERCEPT=INCLUDE
/CRITERIA=ALPHA(.05)
/DESIGN=GENDER GENOTYPE GENDER*GENOTYPE.
```

## Univariate Analysis of Variance

## Notes

|                        |                                |                                                                                                                                                                       |
|------------------------|--------------------------------|-----------------------------------------------------------------------------------------------------------------------------------------------------------------------|
| Output Created         |                                | 19-AUG-2022 12:07:...                                                                                                                                                 |
| Comments               |                                |                                                                                                                                                                       |
| Input                  | Data                           | /Users/jeffneul/Jeff's Research/Neul Manuscripts/FoxG1/June 2022 stat sex and effect size/SPSS files/SPSS Data Files/June 2022 OFA sex EF data.sav                    |
|                        | Active Dataset                 | DataSet2                                                                                                                                                              |
|                        | Filter                         | <none>                                                                                                                                                                |
|                        | Weight                         | <none>                                                                                                                                                                |
|                        | Split File                     | <none>                                                                                                                                                                |
|                        | N of Rows in Working Data File | 57                                                                                                                                                                    |
| Missing Value Handling | Definition of Missing          | User-defined missing values are treated as missing.                                                                                                                   |
|                        | Cases Used                     | Statistics are based on all cases with valid data for all variables in the model.                                                                                     |
| Syntax                 |                                | UNIANOVA<br>DistanceCenter BY<br>GENDER GENOTYPE<br>/METHOD=SSTYPE(3)<br>/INTERCEPT=INCLUDE<br>/CRITERIA=ALPHA(.05)<br>/DESIGN=GENDER<br>GENOTYPE<br>GENDER*GENOTYPE. |
| Resources              | Processor Time                 | 00:00:00.01                                                                                                                                                           |
|                        | Elapsed Time                   | 00:00:00.00                                                                                                                                                           |

### Between-Subjects Factors

|          |    | N  |
|----------|----|----|
| GENDER   | F  | 28 |
|          | M  | 29 |
| GENOTYPE | KI | 31 |
|          | WT | 26 |

## Tests of Between-Subjects Effects

Dependent Variable: % Distance Center

| Source            | Type III Sum of Squares | df | Mean Square | F        | Sig.  |
|-------------------|-------------------------|----|-------------|----------|-------|
| Corrected Model   | 4028.722 <sup>a</sup>   | 3  | 1342.907    | 18.382   | <.001 |
| Intercept         | 166310.545              | 1  | 166310.545  | 2276.514 | <.001 |
| GENDER            | 5.660                   | 1  | 5.660       | .077     | .782  |
| GENOTYPE          | 3881.746                | 1  | 3881.746    | 53.135   | <.001 |
| GENDER * GENOTYPE | 71.398                  | 1  | 71.398      | .977     | .327  |
| Error             | 3871.911                | 53 | 73.055      |          |       |
| Total             | 171631.297              | 57 |             |          |       |
| Corrected Total   | 7900.633                | 56 |             |          |       |

a. R Squared = .510 (Adjusted R Squared = .482)

```
UNIANOVA TimeCenter BY GENDER GENOTYPE
/METHOD=SSTYPE(3)
/INTERCEPT=INCLUDE
/CRITERIA=ALPHA(.05)
/DESIGN=GENDER GENOTYPE GENDER*GENOTYPE.
```

## Univariate Analysis of Variance

## Notes

|                        |                                |                                                                                                                                                    |
|------------------------|--------------------------------|----------------------------------------------------------------------------------------------------------------------------------------------------|
| Output Created         |                                | 19-AUG-2022 12:08:...                                                                                                                              |
| Comments               |                                |                                                                                                                                                    |
| Input                  | Data                           | /Users/jeffneul/Jeff's Research/Neul Manuscripts/FoxG1/June 2022 stat sex and effect size/SPSS files/SPSS Data Files/June 2022 OFA sex EF data.sav |
|                        | Active Dataset                 | DataSet2                                                                                                                                           |
|                        | Filter                         | <none>                                                                                                                                             |
|                        | Weight                         | <none>                                                                                                                                             |
|                        | Split File                     | <none>                                                                                                                                             |
|                        | N of Rows in Working Data File | 57                                                                                                                                                 |
| Missing Value Handling | Definition of Missing          | User-defined missing values are treated as missing.                                                                                                |
|                        | Cases Used                     | Statistics are based on all cases with valid data for all variables in the model.                                                                  |
| Syntax                 |                                | UNIANOVA TimeCenter BY GENDER GENOTYPE /METHOD=SSTYPE(3) /INTERCEPT=INCLUDE /CRITERIA=ALPHA(.05) /DESIGN=GENDER GENOTYPE GENDER*GENOTYPE.          |
| Resources              | Processor Time                 | 00:00:00.01                                                                                                                                        |
|                        | Elapsed Time                   | 00:00:00.00                                                                                                                                        |

### Between-Subjects Factors

|          |    | N  |
|----------|----|----|
| GENDER   | F  | 28 |
|          | M  | 29 |
| GENOTYPE | KI | 31 |
|          | WT | 26 |

### Tests of Between-Subjects Effects

Dependent Variable: % Time Center

| Source            | Type III Sum of Squares | df | Mean Square | F        | Sig.  |
|-------------------|-------------------------|----|-------------|----------|-------|
| Corrected Model   | 697.821 <sup>a</sup>    | 3  | 232.607     | 2.388    | .079  |
| Intercept         | 133499.524              | 1  | 133499.524  | 1370.325 | <.001 |
| GENDER            | .849                    | 1  | .849        | .009     | .926  |
| GENOTYPE          | 669.918                 | 1  | 669.918     | 6.876    | .011  |
| GENDER * GENOTYPE | 15.062                  | 1  | 15.062      | .155     | .696  |
| Error             | 5163.357                | 53 | 97.422      |          |       |
| Total             | 139469.391              | 57 |             |          |       |
| Corrected Total   | 5861.178                | 56 |             |          |       |

a. R Squared = .119 (Adjusted R Squared = .069)

```
UNIANOVA TotalVerticleCountsBY GENDER GENOTYPE
/METHOD=SSTYPE(3)
/INTERCEPT=INCLUDE
/CRITERIA=ALPHA(.05)
/DESIGN=GENDER GENOTYPE GENDER*GENOTYPE.
```

### Univariate Analysis of Variance

## Notes

|                        |                                |                                                                                                                                                                            |
|------------------------|--------------------------------|----------------------------------------------------------------------------------------------------------------------------------------------------------------------------|
| Output Created         |                                | 19-AUG-2022 12:09:...                                                                                                                                                      |
| Comments               |                                |                                                                                                                                                                            |
| Input                  | Data                           | /Users/jeffneul/Jeff's Research/Neul Manuscripts/FoxG1/June 2022 stat sex and effect size/SPSS files/SPSS Data Files/June 2022 OFA sex EF data.sav                         |
|                        | Active Dataset                 | DataSet2                                                                                                                                                                   |
|                        | Filter                         | <none>                                                                                                                                                                     |
|                        | Weight                         | <none>                                                                                                                                                                     |
|                        | Split File                     | <none>                                                                                                                                                                     |
|                        | N of Rows in Working Data File | 57                                                                                                                                                                         |
| Missing Value Handling | Definition of Missing          | User-defined missing values are treated as missing.                                                                                                                        |
|                        | Cases Used                     | Statistics are based on all cases with valid data for all variables in the model.                                                                                          |
| Syntax                 |                                | UNIANOVA<br>TotalVerticleCounts BY<br>GENDER GENOTYPE<br>/METHOD=SSTYPE(3)<br>/INTERCEPT=INCLUDE<br>/CRITERIA=ALPHA(.05)<br>/DESIGN=GENDER<br>GENOTYPE<br>GENDER*GENOTYPE. |
| Resources              | Processor Time                 | 00:00:00.01                                                                                                                                                                |
|                        | Elapsed Time                   | 00:00:00.00                                                                                                                                                                |

### Between-Subjects Factors

|          |    | N  |
|----------|----|----|
| GENDER   | F  | 28 |
|          | M  | 29 |
| GENOTYPE | KI | 31 |
|          | WT | 26 |

## Tests of Between-Subjects Effects

Dependent Variable: Total Verticle Counts

| Source            | Type III Sum of Squares | df | Mean Square | F       | Sig.  |
|-------------------|-------------------------|----|-------------|---------|-------|
| Corrected Model   | 154657.52 <sup>a</sup>  | 3  | 51552.505   | 5.383   | .003  |
| Intercept         | 4763390.28              | 1  | 4763390.28  | 497.418 | <.001 |
| GENDER            | 62762.270               | 1  | 62762.270   | 6.554   | .013  |
| GENOTYPE          | 65730.435               | 1  | 65730.435   | 6.864   | .011  |
| GENDER * GENOTYPE | 29136.155               | 1  | 29136.155   | 3.043   | .087  |
| Error             | 507540.625              | 53 | 9576.238    |         |       |
| Total             | 5484942.00              | 57 |             |         |       |
| Corrected Total   | 662198.140              | 56 |             |         |       |

a. R Squared = .234 (Adjusted R Squared = .190)

```

UNIANOVA TotalAmbulatoryDistanceBY GENOTYPE GENDER
/METHOD=SSTYPE(3)
/INTERCEPT=INCLUDE
/EMMEANS=TABLES(GENOTYPE)
/EMMEANS=TABLES(GENDER)
/PRINT ETASQ
/CRITERIA=ALPHA(.05)
/DESIGN=GENOTYPE GENDER.

```

## Univariate Analysis of Variance



## Notes

|                        |                                |                                                                                                                                                                                                                       |
|------------------------|--------------------------------|-----------------------------------------------------------------------------------------------------------------------------------------------------------------------------------------------------------------------|
| Output Created         |                                | 19-AUG-2022 12:12:...                                                                                                                                                                                                 |
| Comments               |                                |                                                                                                                                                                                                                       |
| Input                  | Data                           | /Users/jeffneul/Jeff's Research/Neul Manuscripts/FoxG1/June 2022 stat sex and effect size/SPSS files/SPSS Data Files/June 2022 OFA sex EF data.sav                                                                    |
|                        | Active Dataset                 | DataSet2                                                                                                                                                                                                              |
|                        | Filter                         | <none>                                                                                                                                                                                                                |
|                        | Weight                         | <none>                                                                                                                                                                                                                |
|                        | Split File                     | <none>                                                                                                                                                                                                                |
|                        | N of Rows in Working Data File | 57                                                                                                                                                                                                                    |
| Missing Value Handling | Definition of Missing          | User-defined missing values are treated as missing.                                                                                                                                                                   |
|                        | Cases Used                     | Statistics are based on all cases with valid data for all variables in the model.                                                                                                                                     |
| Syntax                 |                                | <pre> UNIANOVA TotalAmbulatoryDistanc e BY GENOTYPE GENDER /METHOD=SSTYPE(3) /INTERCEPT=INCLUDE /EMMEANS=TABLES (GENOTYPE) /EMMEANS=TABLES (GENDER) /PRINT ETASQ /CRITERIA=ALPHA(.05) /DESIGN=GENOTYPE GENDER. </pre> |
| Resources              | Processor Time                 | 00:00:00.01                                                                                                                                                                                                           |
|                        | Elapsed Time                   | 00:00:00.00                                                                                                                                                                                                           |

### Between-Subjects Factors

|          |    | N  |
|----------|----|----|
| GENOTYPE | KI | 31 |
|          | WT | 26 |
| GENDER   | F  | 28 |
|          | M  | 29 |

## Tests of Between-Subjects Effects

Dependent Variable: Total Ambulatory Distance

| Source          | Type III Sum of Squares | df | Mean Square | F       | Sig.  | Partial Eta Squared |
|-----------------|-------------------------|----|-------------|---------|-------|---------------------|
| Corrected Model | 13763217 <sup>a</sup>   | 2  | 6881608.70  | 4.772   | .012  | .150                |
| Intercept       | 1.011E+9                | 1  | 1.011E+9    | 701.450 | <.001 | .929                |
| GENOTYPE        | 11370643.6              | 1  | 11370643.6  | 7.885   | .007  | .127                |
| GENDER          | 3359032.52              | 1  | 3359032.52  | 2.329   | .133  | .041                |
| Error           | 77866894.0              | 54 | 1441979.52  |         |       |                     |
| Total           | 1.094E+9                | 57 |             |         |       |                     |
| Corrected Total | 91630111.4              | 56 |             |         |       |                     |

a. R Squared = .150 (Adjusted R Squared = .119)

## Estimated Marginal Means

### 1. GENOTYPE

Dependent Variable: Total Ambulatory Distance

| GENOTYPE | Mean     | Std. Error | 95% Confidence Interval |             |
|----------|----------|------------|-------------------------|-------------|
|          |          |            | Lower Bound             | Upper Bound |
| KI       | 3778.961 | 216.227    | 3345.451                | 4212.471    |
| WT       | 4679.069 | 235.821    | 4206.276                | 5151.861    |

### 2. GENDER

Dependent Variable: Total Ambulatory Distance

| GENDER | Mean     | Std. Error | 95% Confidence Interval |             |
|--------|----------|------------|-------------------------|-------------|
|        |          |            | Lower Bound             | Upper Bound |
| F      | 3985.308 | 226.935    | 3530.331                | 4440.284    |
| M      | 4472.722 | 224.693    | 4022.239                | 4923.205    |

```
UNIANOVA DistanceCenter BY GENOTYPE GENDER
/METHOD=SSTYPE(3)
/INTERCEPT=INCLUDE
/EMMEANS=TABLES(GENOTYPE)
/EMMEANS=TABLES(GENDER)
/PRINT ETASQ
/CRITERIA=ALPHA(.05)
/DESIGN=GENOTYPE GENDER.
```

## Univariate Analysis of Variance

## Notes

|                        |                                |                                                                                                                                                                                                             |
|------------------------|--------------------------------|-------------------------------------------------------------------------------------------------------------------------------------------------------------------------------------------------------------|
| Output Created         |                                | 19-AUG-2022 12:12:...                                                                                                                                                                                       |
| Comments               |                                |                                                                                                                                                                                                             |
| Input                  | Data                           | /Users/jeffneul/Jeff's Research/Neul Manuscripts/FoxG1/June 2022 stat sex and effect size/SPSS files/SPSS Data Files/June 2022 OFA sex EF data.sav                                                          |
|                        | Active Dataset                 | DataSet2                                                                                                                                                                                                    |
|                        | Filter                         | <none>                                                                                                                                                                                                      |
|                        | Weight                         | <none>                                                                                                                                                                                                      |
|                        | Split File                     | <none>                                                                                                                                                                                                      |
|                        | N of Rows in Working Data File | 57                                                                                                                                                                                                          |
| Missing Value Handling | Definition of Missing          | User-defined missing values are treated as missing.                                                                                                                                                         |
|                        | Cases Used                     | Statistics are based on all cases with valid data for all variables in the model.                                                                                                                           |
| Syntax                 |                                | <pre> UNIANOVA DistanceCenter BY GENOTYPE GENDER /METHOD=SSTYPE(3) /INTERCEPT=INCLUDE /EMMEANS=TABLES (GENOTYPE) /EMMEANS=TABLES (GENDER) /PRINT ETASQ /CRITERIA=ALPHA(.05) /DESIGN=GENOTYPE GENDER. </pre> |
| Resources              | Processor Time                 | 00:00:00.02                                                                                                                                                                                                 |
|                        | Elapsed Time                   | 00:00:00.00                                                                                                                                                                                                 |

### Between-Subjects Factors

|          |    | N  |
|----------|----|----|
| GENOTYPE | KI | 31 |
|          | WT | 26 |
| GENDER   | F  | 28 |
|          | M  | 29 |

## Tests of Between-Subjects Effects

Dependent Variable: % Distance Center

| Source          | Type III Sum of Squares | df | Mean Square | F        | Sig.  | Partial Eta Squared |
|-----------------|-------------------------|----|-------------|----------|-------|---------------------|
| Corrected Model | 3957.325 <sup>a</sup>   | 2  | 1978.662    | 27.096   | <.001 | .501                |
| Intercept       | 166953.057              | 1  | 166953.057  | 2286.269 | <.001 | .977                |
| GENOTYPE        | 3884.357                | 1  | 3884.357    | 53.193   | <.001 | .496                |
| GENDER          | 9.718                   | 1  | 9.718       | .133     | .717  | .002                |
| Error           | 3943.309                | 54 | 73.024      |          |       |                     |
| Total           | 171631.297              | 57 |             |          |       |                     |
| Corrected Total | 7900.633                | 56 |             |          |       |                     |

a. R Squared = .501 (Adjusted R Squared = .482)

## Estimated Marginal Means

### 1. GENOTYPE

Dependent Variable: % Distance Center

| GENOTYPE | Mean   | Std. Error | 95% Confidence Interval |             |
|----------|--------|------------|-------------------------|-------------|
|          |        |            | Lower Bound             | Upper Bound |
| KI       | 46.014 | 1.539      | 42.929                  | 49.099      |
| WT       | 62.651 | 1.678      | 59.286                  | 66.015      |

### 2. GENDER

Dependent Variable: % Distance Center

| GENDER | Mean   | Std. Error | 95% Confidence Interval |             |
|--------|--------|------------|-------------------------|-------------|
|        |        |            | Lower Bound             | Upper Bound |
| F      | 54.747 | 1.615      | 51.509                  | 57.985      |
| M      | 53.918 | 1.599      | 50.712                  | 57.124      |

```
UNIANOVA TimeCenter BY GENOTYPE GENDER
/METHOD=SSTYPE(3)
/INTERCEPT=INCLUDE
/EMMEANS=TABLES(GENOTYPE)
/EMMEANS=TABLES(GENDER)
/PRINT ETASQ
/CRITERIA=ALPHA(.05)
/DESIGN=GENOTYPE GENDER.
```

## Univariate Analysis of Variance

## Notes

|                        |                                |                                                                                                                                                                                            |
|------------------------|--------------------------------|--------------------------------------------------------------------------------------------------------------------------------------------------------------------------------------------|
| Output Created         |                                | 19-AUG-2022 12:13:...                                                                                                                                                                      |
| Comments               |                                |                                                                                                                                                                                            |
| Input                  | Data                           | /Users/jeffneul/Jeff's Research/Neul Manuscripts/FoxG1/June 2022 stat sex and effect size/SPSS files/SPSS Data Files/June 2022 OFA sex EF data.sav                                         |
|                        | Active Dataset                 | DataSet2                                                                                                                                                                                   |
|                        | Filter                         | <none>                                                                                                                                                                                     |
|                        | Weight                         | <none>                                                                                                                                                                                     |
|                        | Split File                     | <none>                                                                                                                                                                                     |
|                        | N of Rows in Working Data File | 57                                                                                                                                                                                         |
| Missing Value Handling | Definition of Missing          | User-defined missing values are treated as missing.                                                                                                                                        |
|                        | Cases Used                     | Statistics are based on all cases with valid data for all variables in the model.                                                                                                          |
| Syntax                 |                                | UNIANOVA TimeCenter BY GENOTYPE GENDER /METHOD=SSTYPE(3) /INTERCEPT=INCLUDE /EMMEANS=TABLES (GENOTYPE) /EMMEANS=TABLES (GENDER) /PRINT ETASQ /CRITERIA=ALPHA(.05) /DESIGN=GENOTYPE GENDER. |
| Resources              | Processor Time                 | 00:00:00.02                                                                                                                                                                                |
|                        | Elapsed Time                   | 00:00:00.00                                                                                                                                                                                |

### Between-Subjects Factors

|          |    | N  |
|----------|----|----|
| GENOTYPE | KI | 31 |
|          | WT | 26 |
| GENDER   | F  | 28 |
|          | M  | 29 |

## Tests of Between-Subjects Effects

Dependent Variable: % Time Center

| Source          | Type III Sum of Squares | df | Mean Square | F        | Sig.  | Partial Eta Squared |
|-----------------|-------------------------|----|-------------|----------|-------|---------------------|
| Corrected Model | 682.759 <sup>a</sup>    | 2  | 341.380     | 3.560    | .035  | .116                |
| Intercept       | 134248.538              | 1  | 134248.538  | 1399.929 | <.001 | .963                |
| GENOTYPE        | 670.416                 | 1  | 670.416     | 6.991    | .011  | .115                |
| GENDER          | 1.587                   | 1  | 1.587       | .017     | .898  | .000                |
| Error           | 5178.419                | 54 | 95.897      |          |       |                     |
| Total           | 139469.391              | 57 |             |          |       |                     |
| Corrected Total | 5861.178                | 56 |             |          |       |                     |

a. R Squared = .116 (Adjusted R Squared = .084)

## Estimated Marginal Means

### 1. GENOTYPE

Dependent Variable: % Time Center

| GENOTYPE | Mean   | Std. Error | 95% Confidence Interval |             |
|----------|--------|------------|-------------------------|-------------|
|          |        |            | Lower Bound             | Upper Bound |
| KI       | 45.265 | 1.763      | 41.730                  | 48.800      |
| WT       | 52.177 | 1.923      | 48.321                  | 56.032      |

### 2. GENDER

Dependent Variable: % Time Center

| GENDER | Mean   | Std. Error | 95% Confidence Interval |             |
|--------|--------|------------|-------------------------|-------------|
|        |        |            | Lower Bound             | Upper Bound |
| F      | 48.888 | 1.851      | 45.178                  | 52.599      |
| M      | 48.553 | 1.832      | 44.880                  | 52.227      |

```
UNIANOVA TotalVerticleCountsBY GENOTYPE GENDER
/METHOD=SSTYPE(3)
/INTERCEPT=INCLUDE
/EMMEANS=TABLES(GENOTYPE)
/EMMEANS=TABLES(GENDER)
/PRINT ETASQ
/CRITERIA=ALPHA(.05)
/DESIGN=GENOTYPE GENDER.
```

## Univariate Analysis of Variance

## Notes

|                        |                                |                                                                                                                                                                                                                  |
|------------------------|--------------------------------|------------------------------------------------------------------------------------------------------------------------------------------------------------------------------------------------------------------|
| Output Created         |                                | 19-AUG-2022 12:13:...                                                                                                                                                                                            |
| Comments               |                                |                                                                                                                                                                                                                  |
| Input                  | Data                           | /Users/jeffneul/Jeff's Research/Neul Manuscripts/FoxG1/June 2022 stat sex and effect size/SPSS files/SPSS Data Files/June 2022 OFA sex EF data.sav                                                               |
|                        | Active Dataset                 | DataSet2                                                                                                                                                                                                         |
|                        | Filter                         | <none>                                                                                                                                                                                                           |
|                        | Weight                         | <none>                                                                                                                                                                                                           |
|                        | Split File                     | <none>                                                                                                                                                                                                           |
|                        | N of Rows in Working Data File | 57                                                                                                                                                                                                               |
| Missing Value Handling | Definition of Missing          | User-defined missing values are treated as missing.                                                                                                                                                              |
|                        | Cases Used                     | Statistics are based on all cases with valid data for all variables in the model.                                                                                                                                |
| Syntax                 |                                | <pre> UNIANOVA TotalVerticleCounts BY GENOTYPE GENDER /METHOD=SSTYPE(3) /INTERCEPT=INCLUDE /EMMEANS=TABLES (GENOTYPE) /EMMEANS=TABLES (GENDER) /PRINT ETASQ /CRITERIA=ALPHA(.05) /DESIGN=GENOTYPE GENDER. </pre> |
| Resources              | Processor Time                 | 00:00:00.01                                                                                                                                                                                                      |
|                        | Elapsed Time                   | 00:00:00.00                                                                                                                                                                                                      |

### Between-Subjects Factors

|          |    | N  |
|----------|----|----|
| GENOTYPE | KI | 31 |
|          | WT | 26 |
| GENDER   | F  | 28 |
|          | M  | 29 |

## Tests of Between-Subjects Effects

Dependent Variable: Total Verticle Counts

| Source          | Type III Sum of Squares | df | Mean Square | F       | Sig.  | Partial Eta Squared |
|-----------------|-------------------------|----|-------------|---------|-------|---------------------|
| Corrected Model | 125521.36 <sup>a</sup>  | 2  | 62760.680   | 6.315   | .003  | .190                |
| Intercept       | 4863646.57              | 1  | 4863646.57  | 489.376 | <.001 | .901                |
| GENOTYPE        | 65515.959               | 1  | 65515.959   | 6.592   | .013  | .109                |
| GENDER          | 70856.500               | 1  | 70856.500   | 7.130   | .010  | .117                |
| Error           | 536676.780              | 54 | 9938.459    |         |       |                     |
| Total           | 5484942.00              | 57 |             |         |       |                     |
| Corrected Total | 662198.140              | 56 |             |         |       |                     |

a. R Squared = .190 (Adjusted R Squared = .160)

## Estimated Marginal Means

### 1. GENOTYPE

Dependent Variable: Total Verticle Counts

| GENOTYPE | Mean    | Std. Error | 95% Confidence Interval |             |
|----------|---------|------------|-------------------------|-------------|
|          |         |            | Lower Bound             | Upper Bound |
| KI       | 259.091 | 17.951     | 223.101                 | 295.080     |
| WT       | 327.415 | 19.578     | 288.164                 | 366.666     |

### 2. GENDER

Dependent Variable: Total Verticle Counts

| GENDER | Mean    | Std. Error | 95% Confidence Interval |             |
|--------|---------|------------|-------------------------|-------------|
|        |         |            | Lower Bound             | Upper Bound |
| F      | 257.857 | 18.840     | 220.085                 | 295.629     |
| M      | 328.649 | 18.654     | 291.250                 | 366.047     |



## **Elevated Zero Maze**

```

UNIANOVA DistanceTotal BY GENOTYPE SEX
/METHOD=SSTYPE(3)
/INTERCEPT=INCLUDE
/CRITERIA=ALPHA(0.05)
/DESIGN=GENOTYPE SEX GENOTYPE*SEX.

```

## Univariate Analysis of Variance

### Notes

|                        |                                |                                                                                                                                                               |
|------------------------|--------------------------------|---------------------------------------------------------------------------------------------------------------------------------------------------------------|
| Output Created         |                                | 22-AUG-2022 14:39:...                                                                                                                                         |
| Comments               |                                |                                                                                                                                                               |
| Input                  | Data                           | /Users/jeffneul/Jeff's Research/Neul Manuscripts/FoxG1/June 2022 stat sex and effect size/SPSS files/SPSS Data Files/June 2022 EZM sex EF data.sav            |
|                        | Active Dataset                 | DataSet3                                                                                                                                                      |
|                        | Filter                         | <none>                                                                                                                                                        |
|                        | Weight                         | <none>                                                                                                                                                        |
|                        | Split File                     | <none>                                                                                                                                                        |
|                        | N of Rows in Working Data File | 25                                                                                                                                                            |
| Missing Value Handling | Definition of Missing          | User-defined missing values are treated as missing.                                                                                                           |
|                        | Cases Used                     | Statistics are based on all cases with valid data for all variables in the model.                                                                             |
| Syntax                 |                                | UNIANOVA<br>DistanceTotal BY<br>GENOTYPE SEX<br>/METHOD=SSTYPE(3)<br>/INTERCEPT=INCLUDE<br>/CRITERIA=ALPHA<br>(0.05)<br>/DESIGN=GENOTYPE<br>SEX GENOTYPE*SEX. |
| Resources              | Processor Time                 | 00:00:00.01                                                                                                                                                   |
|                        | Elapsed Time                   | 00:00:00.00                                                                                                                                                   |

[DataSet3] /Users/jeffneul/Jeff's Research/Neul Manuscripts/FoxG1/June 2022 st at sex and effect size/SPSS files/SPSS Data Files/June 2022 EZM sex EF data.sa  
v

## Between-Subjects Factors

|          |    | N  |
|----------|----|----|
| GENOTYPE | KI | 14 |
|          | WT | 11 |
| SEX      | F  | 16 |
|          | M  | 9  |

## Tests of Between-Subjects Effects

Dependent Variable: Distance (Total)

| Source          | Type III Sum of Squares | df | Mean Square | F       | Sig.  |
|-----------------|-------------------------|----|-------------|---------|-------|
| Corrected Model | 22.276 <sup>a</sup>     | 3  | 7.425       | .252    | .859  |
| Intercept       | 8155.817                | 1  | 8155.817    | 277.014 | <.001 |
| GENOTYPE        | 2.968                   | 1  | 2.968       | .101    | .754  |
| SEX             | .353                    | 1  | .353        | .012    | .914  |
| GENOTYPE * SEX  | 12.086                  | 1  | 12.086      | .410    | .529  |
| Error           | 618.279                 | 21 | 29.442      |         |       |
| Total           | 10188.816               | 25 |             |         |       |
| Corrected Total | 640.556                 | 24 |             |         |       |

a. R Squared = .035 (Adjusted R Squared = -.103)

```
UNIANOVA TimeOpen BY GENOTYPE SEX
/METHOD=SSTYPE(3)
/INTERCEPT=INCLUDE
/CRITERIA=ALPHA(0.05)
/DESIGN=GENOTYPE SEX GENOTYPE*SEX.
```

## Univariate Analysis of Variance

## Notes

|                        |                                |                                                                                                                                                    |
|------------------------|--------------------------------|----------------------------------------------------------------------------------------------------------------------------------------------------|
| Output Created         |                                | 22-AUG-2022 14:40:...                                                                                                                              |
| Comments               |                                |                                                                                                                                                    |
| Input                  | Data                           | /Users/jeffneul/Jeff's Research/Neul Manuscripts/FoxG1/June 2022 stat sex and effect size/SPSS files/SPSS Data Files/June 2022 EZM sex EF data.sav |
|                        | Active Dataset                 | DataSet3                                                                                                                                           |
|                        | Filter                         | <none>                                                                                                                                             |
|                        | Weight                         | <none>                                                                                                                                             |
|                        | Split File                     | <none>                                                                                                                                             |
|                        | N of Rows in Working Data File | 25                                                                                                                                                 |
| Missing Value Handling | Definition of Missing          | User-defined missing values are treated as missing.                                                                                                |
|                        | Cases Used                     | Statistics are based on all cases with valid data for all variables in the model.                                                                  |
| Syntax                 |                                | UNIANOVA TimeOpen BY GENOTYPE SEX /METHOD=SSTYPE(3) /INTERCEPT=INCLUDE /CRITERIA=ALPHA (0.05) /DESIGN=GENOTYPE SEX GENOTYPE*SEX.                   |
| Resources              | Processor Time                 | 00:00:00.01                                                                                                                                        |
|                        | Elapsed Time                   | 00:00:00.00                                                                                                                                        |

### Between-Subjects Factors

|          |    | N  |
|----------|----|----|
| GENOTYPE | KI | 14 |
|          | WT | 11 |
| SEX      | F  | 16 |
|          | M  | 9  |

## Tests of Between-Subjects Effects

Dependent Variable: % Time Open

| Source          | Type III Sum of Squares | df | Mean Square | F       | Sig.  |
|-----------------|-------------------------|----|-------------|---------|-------|
| Corrected Model | 173.520 <sup>a</sup>    | 3  | 57.840      | .380    | .769  |
| Intercept       | 48738.508               | 1  | 48738.508   | 320.040 | <.001 |
| GENOTYPE        | 101.012                 | 1  | 101.012     | .663    | .425  |
| SEX             | .477                    | 1  | .477        | .003    | .956  |
| GENOTYPE * SEX  | 20.439                  | 1  | 20.439      | .134    | .718  |
| Error           | 3198.067                | 21 | 152.289     |         |       |
| Total           | 60730.510               | 25 |             |         |       |
| Corrected Total | 3371.588                | 24 |             |         |       |

a. R Squared = .051 (Adjusted R Squared = -.084)

```
UNIANOVA DistanceOpen BY GENOTYPE SEX
/METHOD=SSTYPE(3)
/INTERCEPT=INCLUDE
/CRITERIA=ALPHA(0.05)
/DESIGN=GENOTYPE SEX GENOTYPE*SEX.
```

## Univariate Analysis of Variance

## Notes

|                        |                                |                                                                                                                                                              |
|------------------------|--------------------------------|--------------------------------------------------------------------------------------------------------------------------------------------------------------|
| Output Created         |                                | 22-AUG-2022 14:40:...                                                                                                                                        |
| Comments               |                                |                                                                                                                                                              |
| Input                  | Data                           | /Users/jeffneul/Jeff's Research/Neul Manuscripts/FoxG1/June 2022 stat sex and effect size/SPSS files/SPSS Data Files/June 2022 EZM sex EF data.sav           |
|                        | Active Dataset                 | DataSet3                                                                                                                                                     |
|                        | Filter                         | <none>                                                                                                                                                       |
|                        | Weight                         | <none>                                                                                                                                                       |
|                        | Split File                     | <none>                                                                                                                                                       |
|                        | N of Rows in Working Data File | 25                                                                                                                                                           |
| Missing Value Handling | Definition of Missing          | User-defined missing values are treated as missing.                                                                                                          |
|                        | Cases Used                     | Statistics are based on all cases with valid data for all variables in the model.                                                                            |
| Syntax                 |                                | UNIANOVA<br>DistanceOpen BY<br>GENOTYPE SEX<br>/METHOD=SSTYPE(3)<br>/INTERCEPT=INCLUDE<br>/CRITERIA=ALPHA<br>(0.05)<br>/DESIGN=GENOTYPE<br>SEX GENOTYPE*SEX. |
| Resources              | Processor Time                 | 00:00:00.01                                                                                                                                                  |
|                        | Elapsed Time                   | 00:00:00.00                                                                                                                                                  |

### Between-Subjects Factors

|          |    | N  |
|----------|----|----|
| GENOTYPE | KI | 14 |
|          | WT | 11 |
| SEX      | F  | 16 |
|          | M  | 9  |

## Tests of Between-Subjects Effects

Dependent Variable: % Distance Open

| Source          | Type III Sum of Squares | df | Mean Square | F       | Sig.  |
|-----------------|-------------------------|----|-------------|---------|-------|
| Corrected Model | 503.264 <sup>a</sup>    | 3  | 167.755     | 3.849   | .024  |
| Intercept       | 41539.772               | 1  | 41539.772   | 953.202 | <.001 |
| GENOTYPE        | 294.039                 | 1  | 294.039     | 6.747   | .017  |
| SEX             | 3.118                   | 1  | 3.118       | .072    | .792  |
| GENOTYPE * SEX  | 56.483                  | 1  | 56.483      | 1.296   | .268  |
| Error           | 915.163                 | 21 | 43.579      |         |       |
| Total           | 50414.320               | 25 |             |         |       |
| Corrected Total | 1418.427                | 24 |             |         |       |

a. R Squared = .355 (Adjusted R Squared = .263)

```
UNIANOVA DistanceTotal BY GENOTYPE SEX
/METHOD=SSTYPE(3)
/INTERCEPT=INCLUDE
/EMMEANS=TABLES(GENOTYPE)
/PRINT ETASQ
/CRITERIA=ALPHA(.05)
/DESIGN=GENOTYPE SEX.
```

## Univariate Analysis of Variance

## Notes

|                        |                                |                                                                                                                                                                             |
|------------------------|--------------------------------|-----------------------------------------------------------------------------------------------------------------------------------------------------------------------------|
| Output Created         |                                | 22-AUG-2022 14:42:...                                                                                                                                                       |
| Comments               |                                |                                                                                                                                                                             |
| Input                  | Data                           | /Users/jeffneul/Jeff's Research/Neul Manuscripts/FoxG1/June 2022 stat sex and effect size/SPSS files/SPSS Data Files/June 2022 EZM sex EF data.sav                          |
|                        | Active Dataset                 | DataSet3                                                                                                                                                                    |
|                        | Filter                         | <none>                                                                                                                                                                      |
|                        | Weight                         | <none>                                                                                                                                                                      |
|                        | Split File                     | <none>                                                                                                                                                                      |
|                        | N of Rows in Working Data File | 25                                                                                                                                                                          |
| Missing Value Handling | Definition of Missing          | User-defined missing values are treated as missing.                                                                                                                         |
|                        | Cases Used                     | Statistics are based on all cases with valid data for all variables in the model.                                                                                           |
| Syntax                 |                                | <pre> UNIANOVA DistanceTotal BY GENOTYPE SEX /METHOD=SSTYPE(3) /INTERCEPT=INCLUDE /EMMEANS=TABLES (GENOTYPE) /PRINT ETASQ /CRITERIA=ALPHA(.05) /DESIGN=GENOTYPE SEX. </pre> |
| Resources              | Processor Time                 | 00:00:00.01                                                                                                                                                                 |
|                        | Elapsed Time                   | 00:00:00.00                                                                                                                                                                 |

### Between-Subjects Factors

|          |    | N  |
|----------|----|----|
| GENOTYPE | KI | 14 |
|          | WT | 11 |
| SEX      | F  | 16 |
|          | M  | 9  |



## Tests of Between-Subjects Effects

Dependent Variable: Distance (Total)

| Source          | Type III Sum of Squares | df | Mean Square | F       | Sig.  | Partial Eta Squared |
|-----------------|-------------------------|----|-------------|---------|-------|---------------------|
| Corrected Model | 10.190 <sup>a</sup>     | 2  | 5.095       | .178    | .838  | .016                |
| Intercept       | 8433.338                | 1  | 8433.338    | 294.327 | <.001 | .930                |
| GENOTYPE        | 9.342                   | 1  | 9.342       | .326    | .574  | .015                |
| SEX             | 1.964                   | 1  | 1.964       | .069    | .796  | .003                |
| Error           | 630.365                 | 22 | 28.653      |         |       |                     |
| Total           | 10188.816               | 25 |             |         |       |                     |
| Corrected Total | 640.556                 | 24 |             |         |       |                     |

a. R Squared = .016 (Adjusted R Squared = -.074)

## Estimated Marginal Means

### GENOTYPE

Dependent Variable: Distance (Total)

| GENOTYPE | Mean   | Std. Error | 95% Confidence Interval |             |
|----------|--------|------------|-------------------------|-------------|
|          |        |            | Lower Bound             | Upper Bound |
| KI       | 20.009 | 1.440      | 17.024                  | 22.995      |
| WT       | 18.761 | 1.694      | 15.249                  | 22.274      |

```

UNIANOVA TimeOpen BY GENOTYPE SEX
/METHOD=SSTYPE(3)
/INTERCEPT=INCLUDE
/EMMEANS=TABLES(GENOTYPE)
/PRINT ETASQ
/CRITERIA=ALPHA(.05)
/DESIGN=GENOTYPE SEX.
    
```

## Univariate Analysis of Variance

## Notes

|                        |                                |                                                                                                                                                           |
|------------------------|--------------------------------|-----------------------------------------------------------------------------------------------------------------------------------------------------------|
| Output Created         |                                | 22-AUG-2022 14:42:...                                                                                                                                     |
| Comments               |                                |                                                                                                                                                           |
| Input                  | Data                           | /Users/jeffneul/Jeff's Research/Neul Manuscripts/FoxG1/June 2022 stat sex and effect size/SPSS files/SPSS Data Files/June 2022 EZM sex EF data.sav        |
|                        | Active Dataset                 | DataSet3                                                                                                                                                  |
|                        | Filter                         | <none>                                                                                                                                                    |
|                        | Weight                         | <none>                                                                                                                                                    |
|                        | Split File                     | <none>                                                                                                                                                    |
|                        | N of Rows in Working Data File | 25                                                                                                                                                        |
| Missing Value Handling | Definition of Missing          | User-defined missing values are treated as missing.                                                                                                       |
|                        | Cases Used                     | Statistics are based on all cases with valid data for all variables in the model.                                                                         |
| Syntax                 |                                | UNIANOVA TimeOpen BY GENOTYPE SEX /METHOD=SSTYPE(3) /INTERCEPT=INCLUDE /EMMEANS=TABLES (GENOTYPE) /PRINT ETASQ /CRITERIA=ALPHA(.05) /DESIGN=GENOTYPE SEX. |
| Resources              | Processor Time                 | 00:00:00.02                                                                                                                                               |
|                        | Elapsed Time                   | 00:00:00.00                                                                                                                                               |

### Between-Subjects Factors

|          |    | N  |
|----------|----|----|
| GENOTYPE | KI | 14 |
|          | WT | 11 |
| SEX      | F  | 16 |
|          | M  | 9  |

## Tests of Between-Subjects Effects

Dependent Variable: % Time Open

| Source          | Type III Sum of Squares | df | Mean Square | F       | Sig.  | Partial Eta Squared |
|-----------------|-------------------------|----|-------------|---------|-------|---------------------|
| Corrected Model | 153.081 <sup>a</sup>    | 2  | 76.540      | .523    | .600  | .045                |
| Intercept       | 50804.801               | 1  | 50804.801   | 347.275 | <.001 | .940                |
| GENOTYPE        | 150.272                 | 1  | 150.272     | 1.027   | .322  | .045                |
| SEX             | .104                    | 1  | .104        | .001    | .979  | .000                |
| Error           | 3218.507                | 22 | 146.296     |         |       |                     |
| Total           | 60730.510               | 25 |             |         |       |                     |
| Corrected Total | 3371.588                | 24 |             |         |       |                     |

a. R Squared = .045 (Adjusted R Squared = -.041)

## Estimated Marginal Means

### GENOTYPE

Dependent Variable: % Time Open

| GENOTYPE | Mean   | Std. Error | 95% Confidence Interval |             |
|----------|--------|------------|-------------------------|-------------|
|          |        |            | Lower Bound             | Upper Bound |
| KI       | 50.082 | 3.253      | 43.336                  | 56.829      |
| WT       | 45.078 | 3.827      | 37.141                  | 53.015      |

```
UNIANOVA DistanceOpen BY GENOTYPE SEX
/METHOD=SSTYPE(3)
/INTERCEPT=INCLUDE
/EMMEANS=TABLES(GENOTYPE)
/PRINT ETASQ
/CRITERIA=ALPHA(.05)
/DESIGN=GENOTYPE SEX.
```

## Univariate Analysis of Variance

## Notes

|                        |                                |                                                                                                                                                                            |
|------------------------|--------------------------------|----------------------------------------------------------------------------------------------------------------------------------------------------------------------------|
| Output Created         |                                | 22-AUG-2022 14:43:...                                                                                                                                                      |
| Comments               |                                |                                                                                                                                                                            |
| Input                  | Data                           | /Users/jeffneul/Jeff's Research/Neul Manuscripts/FoxG1/June 2022 stat sex and effect size/SPSS files/SPSS Data Files/June 2022 EZM sex EF data.sav                         |
|                        | Active Dataset                 | DataSet3                                                                                                                                                                   |
|                        | Filter                         | <none>                                                                                                                                                                     |
|                        | Weight                         | <none>                                                                                                                                                                     |
|                        | Split File                     | <none>                                                                                                                                                                     |
|                        | N of Rows in Working Data File | 25                                                                                                                                                                         |
| Missing Value Handling | Definition of Missing          | User-defined missing values are treated as missing.                                                                                                                        |
|                        | Cases Used                     | Statistics are based on all cases with valid data for all variables in the model.                                                                                          |
| Syntax                 |                                | <pre> UNIANOVA DistanceOpen BY GENOTYPE SEX /METHOD=SSTYPE(3) /INTERCEPT=INCLUDE /EMMEANS=TABLES (GENOTYPE) /PRINT ETASQ /CRITERIA=ALPHA(.05) /DESIGN=GENOTYPE SEX. </pre> |
| Resources              | Processor Time                 | 00:00:00.02                                                                                                                                                                |
|                        | Elapsed Time                   | 00:00:00.00                                                                                                                                                                |

### Between-Subjects Factors

|          |    | N  |
|----------|----|----|
| GENOTYPE | KI | 14 |
|          | WT | 11 |
| SEX      | F  | 16 |
|          | M  | 9  |

### Tests of Between-Subjects Effects

Dependent Variable: % Distance Open

| Source          | Type III Sum of Squares | df | Mean Square | F       | Sig.  | Partial Eta Squared |
|-----------------|-------------------------|----|-------------|---------|-------|---------------------|
| Corrected Model | 446.782 <sup>a</sup>    | 2  | 223.391     | 5.058   | .016  | .315                |
| Intercept       | 42984.470               | 1  | 42984.470   | 973.254 | <.001 | .978                |
| GENOTYPE        | 434.508                 | 1  | 434.508     | 9.838   | .005  | .309                |
| SEX             | .010                    | 1  | .010        | .000    | .988  | .000                |
| Error           | 971.646                 | 22 | 44.166      |         |       |                     |
| Total           | 50414.320               | 25 |             |         |       |                     |
| Corrected Total | 1418.427                | 24 |             |         |       |                     |

a. R Squared = .315 (Adjusted R Squared = .253)

### Estimated Marginal Means

#### GENOTYPE

Dependent Variable: % Distance Open

| GENOTYPE | Mean   | Std. Error | 95% Confidence Interval |             |
|----------|--------|------------|-------------------------|-------------|
|          |        |            | Lower Bound             | Upper Bound |
| KI       | 48.020 | 1.787      | 44.313                  | 51.727      |
| WT       | 39.510 | 2.103      | 35.149                  | 43.871      |

**Gait**

```

UNIANOVA ForepawStridems BY GENOTYPE SEX
  /METHOD=SSTYPE(3)
  /INTERCEPT=INCLUDE
  /CRITERIA=ALPHA(.05)
  /DESIGN=GENOTYPE SEX GENOTYPE*SEX.

```

## Univariate Analysis of Variance

### Notes

|                        |                                |                                                                                                                                                            |
|------------------------|--------------------------------|------------------------------------------------------------------------------------------------------------------------------------------------------------|
| Output Created         |                                | 22-AUG-2022 14:52:...                                                                                                                                      |
| Comments               |                                |                                                                                                                                                            |
| Input                  | Data                           | /Users/jeffneul/Jeff's Research/Neul Manuscripts/FoxG1/June 2022 stat sex and effect size/SPSS files/SPSS Data Files/June 2022 Gait sex EF data.sav        |
|                        | Active Dataset                 | DataSet4                                                                                                                                                   |
|                        | Filter                         | <none>                                                                                                                                                     |
|                        | Weight                         | <none>                                                                                                                                                     |
|                        | Split File                     | <none>                                                                                                                                                     |
|                        | N of Rows in Working Data File | 56                                                                                                                                                         |
| Missing Value Handling | Definition of Missing          | User-defined missing values are treated as missing.                                                                                                        |
|                        | Cases Used                     | Statistics are based on all cases with valid data for all variables in the model.                                                                          |
| Syntax                 |                                | UNIANOVA<br>ForepawStridems BY<br>GENOTYPE SEX<br>/METHOD=SSTYPE(3)<br>/INTERCEPT=INCLUDE<br>/CRITERIA=ALPHA(.05)<br>/DESIGN=GENOTYPE<br>SEX GENOTYPE*SEX. |
| Resources              | Processor Time                 | 00:00:00.01                                                                                                                                                |
|                        | Elapsed Time                   | 00:00:00.00                                                                                                                                                |

## Between-Subjects Factors

|          |    | N  |
|----------|----|----|
| GENOTYPE | KI | 30 |
|          | WT | 26 |
| SEX      | F  | 27 |
|          | M  | 29 |

## Tests of Between-Subjects Effects

Dependent Variable: ForepawStride (ms)

| Source          | Type III Sum of Squares | df | Mean Square | F        | Sig.  |
|-----------------|-------------------------|----|-------------|----------|-------|
| Corrected Model | 3561.621 <sup>a</sup>   | 3  | 1187.207    | 1.379    | .259  |
| Intercept       | 4144921.88              | 1  | 4144921.88  | 4815.880 | <.001 |
| GENOTYPE        | 2376.838                | 1  | 2376.838    | 2.762    | .103  |
| SEX             | 1084.747                | 1  | 1084.747    | 1.260    | .267  |
| GENOTYPE * SEX  | 431.261                 | 1  | 431.261     | .501     | .482  |
| Error           | 44755.258               | 52 | 860.678     |          |       |
| Total           | 4244051.19              | 56 |             |          |       |
| Corrected Total | 48316.879               | 55 |             |          |       |

a. R Squared = .074 (Adjusted R Squared = .020)

```
UNIANOVA ForepawPercofSwingBY GENOTYPE SEX
/METHOD=SSTYPE(3)
/INTERCEPT=INCLUDE
/CRITERIA=ALPHA(.05)
/DESIGN=GENOTYPE SEX GENOTYPE*SEX.
```

## Univariate Analysis of Variance



## Notes

|                        |                                |                                                                                                                                                               |
|------------------------|--------------------------------|---------------------------------------------------------------------------------------------------------------------------------------------------------------|
| Output Created         |                                | 22-AUG-2022 14:53:...                                                                                                                                         |
| Comments               |                                |                                                                                                                                                               |
| Input                  | Data                           | /Users/jeffneul/Jeff's Research/Neul Manuscripts/FoxG1/June 2022 stat sex and effect size/SPSS files/SPSS Data Files/June 2022 Gait sex EF data.sav           |
|                        | Active Dataset                 | DataSet4                                                                                                                                                      |
|                        | Filter                         | <none>                                                                                                                                                        |
|                        | Weight                         | <none>                                                                                                                                                        |
|                        | Split File                     | <none>                                                                                                                                                        |
|                        | N of Rows in Working Data File | 56                                                                                                                                                            |
| Missing Value Handling | Definition of Missing          | User-defined missing values are treated as missing.                                                                                                           |
|                        | Cases Used                     | Statistics are based on all cases with valid data for all variables in the model.                                                                             |
| Syntax                 |                                | UNIANOVA<br>ForepawPercofSwing BY<br>GENOTYPE SEX<br>/METHOD=SSTYPE(3)<br>/INTERCEPT=INCLUDE<br>/CRITERIA=ALPHA(.05)<br>/DESIGN=GENOTYPE<br>SEX GENOTYPE*SEX. |
| Resources              | Processor Time                 | 00:00:00.01                                                                                                                                                   |
|                        | Elapsed Time                   | 00:00:00.00                                                                                                                                                   |

### Between-Subjects Factors

|          |    | N  |
|----------|----|----|
| GENOTYPE | KI | 30 |
|          | WT | 26 |
| SEX      | F  | 27 |
|          | M  | 29 |

## Tests of Between-Subjects Effects

Dependent Variable: ForepawPercofSwing

| Source          | Type III Sum of Squares | df | Mean Square | F         | Sig.  |
|-----------------|-------------------------|----|-------------|-----------|-------|
| Corrected Model | .008 <sup>a</sup>       | 3  | .003        | 2.463     | .073  |
| Intercept       | 14.066                  | 1  | 14.066      | 12499.957 | <.001 |
| GENOTYPE        | .008                    | 1  | .008        | 7.036     | .011  |
| SEX             | .001                    | 1  | .001        | .735      | .395  |
| GENOTYPE * SEX  | 6.835E-6                | 1  | 6.835E-6    | .006      | .938  |
| Error           | .059                    | 52 | .001        |           |       |
| Total           | 14.412                  | 56 |             |           |       |
| Corrected Total | .067                    | 55 |             |           |       |

a. R Squared = .124 (Adjusted R Squared = .074)

```
UNIANOVA ForepawStrideLenmmBY GENOTYPE SEX
/METHOD=SSTYPE(3)
/INTERCEPT=INCLUDE
/CRITERIA=ALPHA(.05)
/DESIGN=GENOTYPE SEX GENOTYPE*SEX.
```

## Univariate Analysis of Variance

## Notes

|                        |                                |                                                                                                                                                               |
|------------------------|--------------------------------|---------------------------------------------------------------------------------------------------------------------------------------------------------------|
| Output Created         |                                | 22-AUG-2022 14:53:...                                                                                                                                         |
| Comments               |                                |                                                                                                                                                               |
| Input                  | Data                           | /Users/jeffneul/Jeff's Research/Neul Manuscripts/FoxG1/June 2022 stat sex and effect size/SPSS files/SPSS Data Files/June 2022 Gait sex EF data.sav           |
|                        | Active Dataset                 | DataSet4                                                                                                                                                      |
|                        | Filter                         | <none>                                                                                                                                                        |
|                        | Weight                         | <none>                                                                                                                                                        |
|                        | Split File                     | <none>                                                                                                                                                        |
|                        | N of Rows in Working Data File | 56                                                                                                                                                            |
| Missing Value Handling | Definition of Missing          | User-defined missing values are treated as missing.                                                                                                           |
|                        | Cases Used                     | Statistics are based on all cases with valid data for all variables in the model.                                                                             |
| Syntax                 |                                | UNIANOVA<br>ForepawStrideLenmm BY<br>GENOTYPE SEX<br>/METHOD=SSTYPE(3)<br>/INTERCEPT=INCLUDE<br>/CRITERIA=ALPHA(.05)<br>/DESIGN=GENOTYPE<br>SEX GENOTYPE*SEX. |
| Resources              | Processor Time                 | 00:00:00.01                                                                                                                                                   |
|                        | Elapsed Time                   | 00:00:01.00                                                                                                                                                   |

### Between-Subjects Factors

|          |    | N  |
|----------|----|----|
| GENOTYPE | KI | 30 |
|          | WT | 26 |
| SEX      | F  | 27 |
|          | M  | 29 |

## Tests of Between-Subjects Effects

Dependent Variable: ForepawStrideLen (mm)

| Source          | Type III Sum of Squares | df | Mean Square | F         | Sig.  |
|-----------------|-------------------------|----|-------------|-----------|-------|
| Corrected Model | 68.917 <sup>a</sup>     | 3  | 22.972      | 1.776     | .163  |
| Intercept       | 195002.616              | 1  | 195002.616  | 15072.242 | <.001 |
| GENOTYPE        | 24.871                  | 1  | 24.871      | 1.922     | .172  |
| SEX             | 27.970                  | 1  | 27.970      | 2.162     | .147  |
| GENOTYPE * SEX  | 13.376                  | 1  | 13.376      | 1.034     | .314  |
| Error           | 672.769                 | 52 | 12.938      |           |       |
| Total           | 199154.050              | 56 |             |           |       |
| Corrected Total | 741.686                 | 55 |             |           |       |

a. R Squared = .093 (Adjusted R Squared = .041)

```
UNIANOVA ForepawAvPrintAreaBY GENOTYPE SEX
/METHOD=SSTYPE(3)
/INTERCEPT=INCLUDE
/CRITERIA=ALPHA(.05)
/DESIGN=GENOTYPE SEX GENOTYPE*SEX.
```

## Univariate Analysis of Variance

## Notes

|                        |                                |                                                                                                                                                               |
|------------------------|--------------------------------|---------------------------------------------------------------------------------------------------------------------------------------------------------------|
| Output Created         |                                | 22-AUG-2022 14:53:...                                                                                                                                         |
| Comments               |                                |                                                                                                                                                               |
| Input                  | Data                           | /Users/jeffneul/Jeff's Research/Neul Manuscripts/FoxG1/June 2022 stat sex and effect size/SPSS files/SPSS Data Files/June 2022 Gait sex EF data.sav           |
|                        | Active Dataset                 | DataSet4                                                                                                                                                      |
|                        | Filter                         | <none>                                                                                                                                                        |
|                        | Weight                         | <none>                                                                                                                                                        |
|                        | Split File                     | <none>                                                                                                                                                        |
|                        | N of Rows in Working Data File | 56                                                                                                                                                            |
| Missing Value Handling | Definition of Missing          | User-defined missing values are treated as missing.                                                                                                           |
|                        | Cases Used                     | Statistics are based on all cases with valid data for all variables in the model.                                                                             |
| Syntax                 |                                | UNIANOVA<br>ForepawAvPrintArea BY<br>GENOTYPE SEX<br>/METHOD=SSTYPE(3)<br>/INTERCEPT=INCLUDE<br>/CRITERIA=ALPHA(.05)<br>/DESIGN=GENOTYPE<br>SEX GENOTYPE*SEX. |
| Resources              | Processor Time                 | 00:00:00.01                                                                                                                                                   |
|                        | Elapsed Time                   | 00:00:00.00                                                                                                                                                   |

### Between-Subjects Factors

|          |    | N  |
|----------|----|----|
| GENOTYPE | KI | 30 |
|          | WT | 26 |
| SEX      | F  | 27 |
|          | M  | 29 |

## Tests of Between-Subjects Effects

Dependent Variable: ForepawAvPrintArea

| Source          | Type III Sum of Squares | df | Mean Square | F        | Sig.  |
|-----------------|-------------------------|----|-------------|----------|-------|
| Corrected Model | 8712.657 <sup>a</sup>   | 3  | 2904.219    | 3.665    | .018  |
| Intercept       | 1131707.78              | 1  | 1131707.78  | 1428.281 | <.001 |
| GENOTYPE        | 5160.165                | 1  | 5160.165    | 6.512    | .014  |
| SEX             | 4448.738                | 1  | 4448.738    | 5.615    | .022  |
| GENOTYPE * SEX  | 3.242                   | 1  | 3.242       | .004     | .949  |
| Error           | 41202.552               | 52 | 792.357     |          |       |
| Total           | 1194257.43              | 56 |             |          |       |
| Corrected Total | 49915.208               | 55 |             |          |       |

a. R Squared = .175 (Adjusted R Squared = .127)

```
UNIANOVA HindpawStridems BY GENOTYPE SEX
/METHOD=SSTYPE(3)
/INTERCEPT=INCLUDE
/CRITERIA=ALPHA(.05)
/DESIGN=GENOTYPE SEX GENOTYPE*SEX.
```

## Univariate Analysis of Variance

## Notes

|                        |                                |                                                                                                                                                            |
|------------------------|--------------------------------|------------------------------------------------------------------------------------------------------------------------------------------------------------|
| Output Created         |                                | 22-AUG-2022 14:54:...                                                                                                                                      |
| Comments               |                                |                                                                                                                                                            |
| Input                  | Data                           | /Users/jeffneul/Jeff's Research/Neul Manuscripts/FoxG1/June 2022 stat sex and effect size/SPSS files/SPSS Data Files/June 2022 Gait sex EF data.sav        |
|                        | Active Dataset                 | DataSet4                                                                                                                                                   |
|                        | Filter                         | <none>                                                                                                                                                     |
|                        | Weight                         | <none>                                                                                                                                                     |
|                        | Split File                     | <none>                                                                                                                                                     |
|                        | N of Rows in Working Data File | 56                                                                                                                                                         |
| Missing Value Handling | Definition of Missing          | User-defined missing values are treated as missing.                                                                                                        |
|                        | Cases Used                     | Statistics are based on all cases with valid data for all variables in the model.                                                                          |
| Syntax                 |                                | UNIANOVA<br>HindpawStridems BY<br>GENOTYPE SEX<br>/METHOD=SSTYPE(3)<br>/INTERCEPT=INCLUDE<br>/CRITERIA=ALPHA(.05)<br>/DESIGN=GENOTYPE<br>SEX GENOTYPE*SEX. |
| Resources              | Processor Time                 | 00:00:00.01                                                                                                                                                |
|                        | Elapsed Time                   | 00:00:00.00                                                                                                                                                |

### Between-Subjects Factors

|          |    | N  |
|----------|----|----|
| GENOTYPE | KI | 30 |
|          | WT | 26 |
| SEX      | F  | 27 |
|          | M  | 29 |

## Tests of Between-Subjects Effects

Dependent Variable: HindpawStride (ms)

| Source          | Type III Sum of Squares | df | Mean Square | F        | Sig.  |
|-----------------|-------------------------|----|-------------|----------|-------|
| Corrected Model | 942.235 <sup>a</sup>    | 3  | 314.078     | .354     | .787  |
| Intercept       | 4435616.86              | 1  | 4435616.86  | 4997.572 | <.001 |
| GENOTYPE        | 21.808                  | 1  | 21.808      | .025     | .876  |
| SEX             | 198.873                 | 1  | 198.873     | .224     | .638  |
| GENOTYPE * SEX  | 644.920                 | 1  | 644.920     | .727     | .398  |
| Error           | 46152.831               | 52 | 887.554     |          |       |
| Total           | 4541914.50              | 56 |             |          |       |
| Corrected Total | 47095.066               | 55 |             |          |       |

a. R Squared = .020 (Adjusted R Squared = -.037)

```
UNIANOVA HindpawPercofSwingBY GENOTYPE SEX
/METHOD=SSTYPE(3)
/INTERCEPT=INCLUDE
/CRITERIA=ALPHA(.05)
/DESIGN=GENOTYPE SEX GENOTYPE*SEX.
```

## Univariate Analysis of Variance



## Notes

|                        |                                |                                                                                                                                                               |
|------------------------|--------------------------------|---------------------------------------------------------------------------------------------------------------------------------------------------------------|
| Output Created         |                                | 22-AUG-2022 14:54:...                                                                                                                                         |
| Comments               |                                |                                                                                                                                                               |
| Input                  | Data                           | /Users/jeffneul/Jeff's Research/Neul Manuscripts/FoxG1/June 2022 stat sex and effect size/SPSS files/SPSS Data Files/June 2022 Gait sex EF data.sav           |
|                        | Active Dataset                 | DataSet4                                                                                                                                                      |
|                        | Filter                         | <none>                                                                                                                                                        |
|                        | Weight                         | <none>                                                                                                                                                        |
|                        | Split File                     | <none>                                                                                                                                                        |
|                        | N of Rows in Working Data File | 56                                                                                                                                                            |
| Missing Value Handling | Definition of Missing          | User-defined missing values are treated as missing.                                                                                                           |
|                        | Cases Used                     | Statistics are based on all cases with valid data for all variables in the model.                                                                             |
| Syntax                 |                                | UNIANOVA<br>HindpawPercofSwing BY<br>GENOTYPE SEX<br>/METHOD=SSTYPE(3)<br>/INTERCEPT=INCLUDE<br>/CRITERIA=ALPHA(.05)<br>/DESIGN=GENOTYPE<br>SEX GENOTYPE*SEX. |
| Resources              | Processor Time                 | 00:00:00.01                                                                                                                                                   |
|                        | Elapsed Time                   | 00:00:00.00                                                                                                                                                   |

### Between-Subjects Factors

|          |    | N  |
|----------|----|----|
| GENOTYPE | KI | 30 |
|          | WT | 26 |
| SEX      | F  | 27 |
|          | M  | 29 |

## Tests of Between-Subjects Effects

Dependent Variable: HindpawPercofSwing

| Source          | Type III Sum of Squares | df | Mean Square | F        | Sig.  |
|-----------------|-------------------------|----|-------------|----------|-------|
| Corrected Model | .026 <sup>a</sup>       | 3  | .009        | 4.644    | .006  |
| Intercept       | 16.573                  | 1  | 16.573      | 8775.500 | <.001 |
| GENOTYPE        | .022                    | 1  | .022        | 11.629   | .001  |
| SEX             | .004                    | 1  | .004        | 2.130    | .150  |
| GENOTYPE * SEX  | .002                    | 1  | .002        | 1.064    | .307  |
| Error           | .098                    | 52 | .002        |          |       |
| Total           | 17.084                  | 56 |             |          |       |
| Corrected Total | .125                    | 55 |             |          |       |

a. R Squared = .211 (Adjusted R Squared = .166)

```
UNIANOVA HindpawStrideLenmmBY GENOTYPE SEX
/METHOD=SSTYPE(3)
/INTERCEPT=INCLUDE
/CRITERIA=ALPHA(.05)
/DESIGN=GENOTYPE SEX GENOTYPE*SEX.
```

## Univariate Analysis of Variance

## Notes

|                        |                                |                                                                                                                                                               |
|------------------------|--------------------------------|---------------------------------------------------------------------------------------------------------------------------------------------------------------|
| Output Created         |                                | 22-AUG-2022 14:55:...                                                                                                                                         |
| Comments               |                                |                                                                                                                                                               |
| Input                  | Data                           | /Users/jeffneul/Jeff's Research/Neul Manuscripts/FoxG1/June 2022 stat sex and effect size/SPSS files/SPSS Data Files/June 2022 Gait sex EF data.sav           |
|                        | Active Dataset                 | DataSet4                                                                                                                                                      |
|                        | Filter                         | <none>                                                                                                                                                        |
|                        | Weight                         | <none>                                                                                                                                                        |
|                        | Split File                     | <none>                                                                                                                                                        |
|                        | N of Rows in Working Data File | 56                                                                                                                                                            |
| Missing Value Handling | Definition of Missing          | User-defined missing values are treated as missing.                                                                                                           |
|                        | Cases Used                     | Statistics are based on all cases with valid data for all variables in the model.                                                                             |
| Syntax                 |                                | UNIANOVA<br>HindpawStrideLenmm<br>BY GENOTYPE SEX<br>/METHOD=SSTYPE(3)<br>/INTERCEPT=INCLUDE<br>/CRITERIA=ALPHA(.05)<br>/DESIGN=GENOTYPE<br>SEX GENOTYPE*SEX. |
| Resources              | Processor Time                 | 00:00:00.01                                                                                                                                                   |
|                        | Elapsed Time                   | 00:00:00.00                                                                                                                                                   |

### Between-Subjects Factors

|          |    | N  |
|----------|----|----|
| GENOTYPE | KI | 30 |
|          | WT | 26 |
| SEX      | F  | 27 |
|          | M  | 29 |

## Tests of Between-Subjects Effects

Dependent Variable: HindpawStrideLen (mm)

| Source          | Type III Sum of Squares | df | Mean Square | F        | Sig.  |
|-----------------|-------------------------|----|-------------|----------|-------|
| Corrected Model | 181.084 <sup>a</sup>    | 3  | 60.361      | 2.207    | .098  |
| Intercept       | 211971.182              | 1  | 211971.182  | 7749.294 | <.001 |
| GENOTYPE        | 152.475                 | 1  | 152.475     | 5.574    | .022  |
| SEX             | 8.348                   | 1  | 8.348       | .305     | .583  |
| GENOTYPE * SEX  | 27.423                  | 1  | 27.423      | 1.003    | .321  |
| Error           | 1422.388                | 52 | 27.354      |          |       |
| Total           | 217335.402              | 56 |             |          |       |
| Corrected Total | 1603.472                | 55 |             |          |       |

a. R Squared = .113 (Adjusted R Squared = .062)

```
UNIANOVA HindpawAvPrintAreaBY GENOTYPE SEX
/METHOD=SSTYPE(3)
/INTERCEPT=INCLUDE
/CRITERIA=ALPHA(.05)
/DESIGN=GENOTYPE SEX GENOTYPE*SEX.
```

## Univariate Analysis of Variance

## Notes

|                        |                                |                                                                                                                                                               |
|------------------------|--------------------------------|---------------------------------------------------------------------------------------------------------------------------------------------------------------|
| Output Created         |                                | 22-AUG-2022 14:55:...                                                                                                                                         |
| Comments               |                                |                                                                                                                                                               |
| Input                  | Data                           | /Users/jeffneul/Jeff's Research/Neul Manuscripts/FoxG1/June 2022 stat sex and effect size/SPSS files/SPSS Data Files/June 2022 Gait sex EF data.sav           |
|                        | Active Dataset                 | DataSet4                                                                                                                                                      |
|                        | Filter                         | <none>                                                                                                                                                        |
|                        | Weight                         | <none>                                                                                                                                                        |
|                        | Split File                     | <none>                                                                                                                                                        |
|                        | N of Rows in Working Data File | 56                                                                                                                                                            |
| Missing Value Handling | Definition of Missing          | User-defined missing values are treated as missing.                                                                                                           |
|                        | Cases Used                     | Statistics are based on all cases with valid data for all variables in the model.                                                                             |
| Syntax                 |                                | UNIANOVA<br>HindpawAvPrintArea BY<br>GENOTYPE SEX<br>/METHOD=SSTYPE(3)<br>/INTERCEPT=INCLUDE<br>/CRITERIA=ALPHA(.05)<br>/DESIGN=GENOTYPE<br>SEX GENOTYPE*SEX. |
| Resources              | Processor Time                 | 00:00:00.01                                                                                                                                                   |
|                        | Elapsed Time                   | 00:00:00.00                                                                                                                                                   |

### Between-Subjects Factors

|          |    | N  |
|----------|----|----|
| GENOTYPE | KI | 30 |
|          | WT | 26 |
| SEX      | F  | 27 |
|          | M  | 29 |

## Tests of Between-Subjects Effects

Dependent Variable: HindpawAvPrintArea

| Source          | Type III Sum of Squares | df | Mean Square | F        | Sig.  |
|-----------------|-------------------------|----|-------------|----------|-------|
| Corrected Model | 11364.791 <sup>a</sup>  | 3  | 3788.264    | 1.402    | .253  |
| Intercept       | 2894901.83              | 1  | 2894901.83  | 1071.487 | <.001 |
| GENOTYPE        | 11332.251               | 1  | 11332.251   | 4.194    | .046  |
| SEX             | 31.538                  | 1  | 31.538      | .012     | .914  |
| GENOTYPE * SEX  | 19.792                  | 1  | 19.792      | .007     | .932  |
| Error           | 140491.555              | 52 | 2701.761    |          |       |
| Total           | 3071417.03              | 56 |             |          |       |
| Corrected Total | 151856.346              | 55 |             |          |       |

a. R Squared = .075 (Adjusted R Squared = .021)

```
UNIANOVA FrTkWdmm BY GENOTYPE SEX
/METHOD=SSTYPE(3)
/INTERCEPT=INCLUDE
/CRITERIA=ALPHA(.05)
/DESIGN=GENOTYPE SEX GENOTYPE*SEX.
```

## Univariate Analysis of Variance

## Notes

|                        |                                |                                                                                                                                                     |
|------------------------|--------------------------------|-----------------------------------------------------------------------------------------------------------------------------------------------------|
| Output Created         |                                | 22-AUG-2022 14:55:...                                                                                                                               |
| Comments               |                                |                                                                                                                                                     |
| Input                  | Data                           | /Users/jeffneul/Jeff's Research/Neul Manuscripts/FoxG1/June 2022 stat sex and effect size/SPSS files/SPSS Data Files/June 2022 Gait sex EF data.sav |
|                        | Active Dataset                 | DataSet4                                                                                                                                            |
|                        | Filter                         | <none>                                                                                                                                              |
|                        | Weight                         | <none>                                                                                                                                              |
|                        | Split File                     | <none>                                                                                                                                              |
|                        | N of Rows in Working Data File | 56                                                                                                                                                  |
| Missing Value Handling | Definition of Missing          | User-defined missing values are treated as missing.                                                                                                 |
|                        | Cases Used                     | Statistics are based on all cases with valid data for all variables in the model.                                                                   |
| Syntax                 |                                | UNIANOVA FrTkWdmm BY GENOTYPE SEX /METHOD=SSTYPE(3) /INTERCEPT=INCLUDE /CRITERIA=ALPHA(.05) /DESIGN=GENOTYPE SEX GENOTYPE*SEX.                      |
| Resources              | Processor Time                 | 00:00:00.01                                                                                                                                         |
|                        | Elapsed Time                   | 00:00:00.00                                                                                                                                         |

### Between-Subjects Factors

|          |    | N  |
|----------|----|----|
| GENOTYPE | KI | 30 |
|          | WT | 26 |
| SEX      | F  | 27 |
|          | M  | 29 |

## Tests of Between-Subjects Effects

Dependent Variable: FrTkWd (mm)

| Source          | Type III Sum of Squares | df | Mean Square | F        | Sig.  |
|-----------------|-------------------------|----|-------------|----------|-------|
| Corrected Model | 1.272 <sup>a</sup>      | 3  | .424        | .457     | .713  |
| Intercept       | 7796.063                | 1  | 7796.063    | 8407.829 | <.001 |
| GENOTYPE        | .041                    | 1  | .041        | .044     | .835  |
| SEX             | 1.053                   | 1  | 1.053       | 1.135    | .292  |
| GENOTYPE * SEX  | .154                    | 1  | .154        | .166     | .685  |
| Error           | 48.216                  | 52 | .927        |          |       |
| Total           | 7987.913                | 56 |             |          |       |
| Corrected Total | 49.488                  | 55 |             |          |       |

a. R Squared = .026 (Adjusted R Squared = -.031)

```
UNIANOVA RrTkWdmm BY GENOTYPE SEX
/METHOD=SSTYPE(3)
/INTERCEPT=INCLUDE
/CRITERIA=ALPHA(.05)
/DESIGN=GENOTYPE SEX GENOTYPE*SEX.
```

## Univariate Analysis of Variance



## Notes

|                        |                                |                                                                                                                                                     |
|------------------------|--------------------------------|-----------------------------------------------------------------------------------------------------------------------------------------------------|
| Output Created         |                                | 22-AUG-2022 14:56:...                                                                                                                               |
| Comments               |                                |                                                                                                                                                     |
| Input                  | Data                           | /Users/jeffneul/Jeff's Research/Neul Manuscripts/FoxG1/June 2022 stat sex and effect size/SPSS files/SPSS Data Files/June 2022 Gait sex EF data.sav |
|                        | Active Dataset                 | DataSet4                                                                                                                                            |
|                        | Filter                         | <none>                                                                                                                                              |
|                        | Weight                         | <none>                                                                                                                                              |
|                        | Split File                     | <none>                                                                                                                                              |
|                        | N of Rows in Working Data File | 56                                                                                                                                                  |
| Missing Value Handling | Definition of Missing          | User-defined missing values are treated as missing.                                                                                                 |
|                        | Cases Used                     | Statistics are based on all cases with valid data for all variables in the model.                                                                   |
| Syntax                 |                                | UNIANOVA RrTkWdmm BY GENOTYPE SEX /METHOD=SSTYPE(3) /INTERCEPT=INCLUDE /CRITERIA=ALPHA(.05) /DESIGN=GENOTYPE SEX GENOTYPE*SEX.                      |
| Resources              | Processor Time                 | 00:00:00.01                                                                                                                                         |
|                        | Elapsed Time                   | 00:00:00.00                                                                                                                                         |

### Between-Subjects Factors

|          |    | N  |
|----------|----|----|
| GENOTYPE | KI | 30 |
|          | WT | 26 |
| SEX      | F  | 27 |
|          | M  | 29 |

## Tests of Between-Subjects Effects

Dependent Variable: RrTkWd (mm)

| Source          | Type III Sum of Squares | df | Mean Square | F         | Sig.  |
|-----------------|-------------------------|----|-------------|-----------|-------|
| Corrected Model | 14.817 <sup>a</sup>     | 3  | 4.939       | 2.935     | .042  |
| Intercept       | 23374.497               | 1  | 23374.497   | 13889.489 | <.001 |
| GENOTYPE        | 7.276                   | 1  | 7.276       | 4.323     | .043  |
| SEX             | 7.606                   | 1  | 7.606       | 4.519     | .038  |
| GENOTYPE * SEX  | 1.592                   | 1  | 1.592       | .946      | .335  |
| Error           | 87.510                  | 52 | 1.683       |           |       |
| Total           | 23797.790               | 56 |             |           |       |
| Corrected Total | 102.327                 | 55 |             |           |       |

a. R Squared = .145 (Adjusted R Squared = .095)

```
UNIANOVA OverallAvgRunSpeedmmsBY GENOTYPE SEX
/METHOD=SSTYPE(3)
/INTERCEPT=INCLUDE
/CRITERIA=ALPHA(.05)
/DESIGN=GENOTYPE SEX GENOTYPE*SEX.
```

## Univariate Analysis of Variance

## Notes

|                        |                                |                                                                                                                                                                   |
|------------------------|--------------------------------|-------------------------------------------------------------------------------------------------------------------------------------------------------------------|
| Output Created         |                                | 22-AUG-2022 14:56:...                                                                                                                                             |
| Comments               |                                |                                                                                                                                                                   |
| Input                  | Data                           | /Users/jeffneul/Jeff's Research/Neul Manuscripts/FoxG1/June 2022 stat sex and effect size/SPSS files/SPSS Data Files/June 2022 Gait sex EF data.sav               |
|                        | Active Dataset                 | DataSet4                                                                                                                                                          |
|                        | Filter                         | <none>                                                                                                                                                            |
|                        | Weight                         | <none>                                                                                                                                                            |
|                        | Split File                     | <none>                                                                                                                                                            |
|                        | N of Rows in Working Data File | 56                                                                                                                                                                |
| Missing Value Handling | Definition of Missing          | User-defined missing values are treated as missing.                                                                                                               |
|                        | Cases Used                     | Statistics are based on all cases with valid data for all variables in the model.                                                                                 |
| Syntax                 |                                | UNIANOVA<br>OverallAvgRunSpeedmm<br>s BY GENOTYPE SEX<br>/METHOD=SSTYPE(3)<br>/INTERCEPT=INCLUDE<br>/CRITERIA=ALPHA(.05)<br>/DESIGN=GENOTYPE<br>SEX GENOTYPE*SEX. |
| Resources              | Processor Time                 | 00:00:00.01                                                                                                                                                       |
|                        | Elapsed Time                   | 00:00:00.00                                                                                                                                                       |

### Between-Subjects Factors

|          |    | N  |
|----------|----|----|
| GENOTYPE | KI | 30 |
|          | WT | 26 |
| SEX      | F  | 27 |
|          | M  | 29 |

## Tests of Between-Subjects Effects

Dependent Variable: Overall Avg Run Speed (mm/s):

| Source          | Type III Sum of Squares | df | Mean Square | F        | Sig.  |
|-----------------|-------------------------|----|-------------|----------|-------|
| Corrected Model | 581.380 <sup>a</sup>    | 3  | 193.793     | .530     | .663  |
| Intercept       | 1813166.52              | 1  | 1813166.52  | 4962.516 | <.001 |
| GENOTYPE        | 432.628                 | 1  | 432.628     | 1.184    | .282  |
| SEX             | 128.013                 | 1  | 128.013     | .350     | .556  |
| GENOTYPE * SEX  | 66.461                  | 1  | 66.461      | .182     | .672  |
| Error           | 18999.367               | 52 | 365.372     |          |       |
| Total           | 1868529.23              | 56 |             |          |       |
| Corrected Total | 19580.747               | 55 |             |          |       |

a. R Squared = .030 (Adjusted R Squared = -.026)

```
UNIANOVA ForepawHomolatCplBY GENOTYPE SEX
/METHOD=SSTYPE(3)
/INTERCEPT=INCLUDE
/CRITERIA=ALPHA(.05)
/DESIGN=GENOTYPE SEX GENOTYPE*SEX.
```

## Univariate Analysis of Variance

## Notes

|                        |                                |                                                                                                                                                              |
|------------------------|--------------------------------|--------------------------------------------------------------------------------------------------------------------------------------------------------------|
| Output Created         |                                | 22-AUG-2022 14:56:...                                                                                                                                        |
| Comments               |                                |                                                                                                                                                              |
| Input                  | Data                           | /Users/jeffneul/Jeff's Research/Neul Manuscripts/FoxG1/June 2022 stat sex and effect size/SPSS files/SPSS Data Files/June 2022 Gait sex EF data.sav          |
|                        | Active Dataset                 | DataSet4                                                                                                                                                     |
|                        | Filter                         | <none>                                                                                                                                                       |
|                        | Weight                         | <none>                                                                                                                                                       |
|                        | Split File                     | <none>                                                                                                                                                       |
|                        | N of Rows in Working Data File | 56                                                                                                                                                           |
| Missing Value Handling | Definition of Missing          | User-defined missing values are treated as missing.                                                                                                          |
|                        | Cases Used                     | Statistics are based on all cases with valid data for all variables in the model.                                                                            |
| Syntax                 |                                | UNIANOVA<br>ForepawHomolatCpl BY<br>GENOTYPE SEX<br>/METHOD=SSTYPE(3)<br>/INTERCEPT=INCLUDE<br>/CRITERIA=ALPHA(.05)<br>/DESIGN=GENOTYPE<br>SEX GENOTYPE*SEX. |
| Resources              | Processor Time                 | 00:00:00.01                                                                                                                                                  |
|                        | Elapsed Time                   | 00:00:00.00                                                                                                                                                  |

### Between-Subjects Factors

|          |    | N  |
|----------|----|----|
| GENOTYPE | KI | 30 |
|          | WT | 26 |
| SEX      | F  | 27 |
|          | M  | 29 |

## Tests of Between-Subjects Effects

Dependent Variable: ForepawHomolatCpl

| Source          | Type III Sum of Squares | df | Mean Square | F         | Sig.  |
|-----------------|-------------------------|----|-------------|-----------|-------|
| Corrected Model | .006 <sup>a</sup>       | 3  | .002        | 1.612     | .198  |
| Intercept       | 15.735                  | 1  | 15.735      | 13353.892 | <.001 |
| GENOTYPE        | .004                    | 1  | .004        | 3.518     | .066  |
| SEX             | .002                    | 1  | .002        | 1.502     | .226  |
| GENOTYPE * SEX  | .000                    | 1  | .000        | .272      | .604  |
| Error           | .061                    | 52 | .001        |           |       |
| Total           | 16.106                  | 56 |             |           |       |
| Corrected Total | .067                    | 55 |             |           |       |

a. R Squared = .085 (Adjusted R Squared = .032)

```
UNIANOVA ForepawHomologCpl BY GENOTYPE SEX
/METHOD=SSTYPE(3)
/INTERCEPT=INCLUDE
/CRITERIA=ALPHA(.05)
/DESIGN=GENOTYPE SEX GENOTYPE*SEX.
```

## Univariate Analysis of Variance

## Notes

|                        |                                |                                                                                                                                                              |
|------------------------|--------------------------------|--------------------------------------------------------------------------------------------------------------------------------------------------------------|
| Output Created         |                                | 22-AUG-2022 14:57:...                                                                                                                                        |
| Comments               |                                |                                                                                                                                                              |
| Input                  | Data                           | /Users/jeffneul/Jeff's Research/Neul Manuscripts/FoxG1/June 2022 stat sex and effect size/SPSS files/SPSS Data Files/June 2022 Gait sex EF data.sav          |
|                        | Active Dataset                 | DataSet4                                                                                                                                                     |
|                        | Filter                         | <none>                                                                                                                                                       |
|                        | Weight                         | <none>                                                                                                                                                       |
|                        | Split File                     | <none>                                                                                                                                                       |
|                        | N of Rows in Working Data File | 56                                                                                                                                                           |
| Missing Value Handling | Definition of Missing          | User-defined missing values are treated as missing.                                                                                                          |
|                        | Cases Used                     | Statistics are based on all cases with valid data for all variables in the model.                                                                            |
| Syntax                 |                                | UNIANOVA<br>ForepawHomologCpl BY<br>GENOTYPE SEX<br>/METHOD=SSTYPE(3)<br>/INTERCEPT=INCLUDE<br>/CRITERIA=ALPHA(.05)<br>/DESIGN=GENOTYPE<br>SEX GENOTYPE*SEX. |
| Resources              | Processor Time                 | 00:00:00.01                                                                                                                                                  |
|                        | Elapsed Time                   | 00:00:00.00                                                                                                                                                  |

### Between-Subjects Factors

|          |    | N  |
|----------|----|----|
| GENOTYPE | KI | 30 |
|          | WT | 26 |
| SEX      | F  | 27 |
|          | M  | 29 |

## Tests of Between-Subjects Effects

Dependent Variable: ForepawHomologCpl

| Source          | Type III Sum of Squares | df | Mean Square | F          | Sig.  |
|-----------------|-------------------------|----|-------------|------------|-------|
| Corrected Model | .000 <sup>a</sup>       | 3  | 8.407E-5    | 1.088      | .362  |
| Intercept       | 13.500                  | 1  | 13.500      | 174730.403 | <.001 |
| GENOTYPE        | 3.616E-5                | 1  | 3.616E-5    | .468       | .497  |
| SEX             | .000                    | 1  | .000        | 2.292      | .136  |
| GENOTYPE * SEX  | 1.137E-5                | 1  | 1.137E-5    | .147       | .703  |
| Error           | .004                    | 52 | 7.726E-5    |            |       |
| Total           | 13.721                  | 56 |             |            |       |
| Corrected Total | .004                    | 55 |             |            |       |

a. R Squared = .059 (Adjusted R Squared = .005)

```
UNIANOVA ForepawDiagonalCplBY GENOTYPE SEX
/METHOD=SSTYPE(3)
/INTERCEPT=INCLUDE
/CRITERIA=ALPHA(.05)
/DESIGN=GENOTYPE SEX GENOTYPE*SEX.
```

## Univariate Analysis of Variance



## Notes

|                        |                                |                                                                                                                                                               |
|------------------------|--------------------------------|---------------------------------------------------------------------------------------------------------------------------------------------------------------|
| Output Created         |                                | 22-AUG-2022 14:57:...                                                                                                                                         |
| Comments               |                                |                                                                                                                                                               |
| Input                  | Data                           | /Users/jeffneul/Jeff's Research/Neul Manuscripts/FoxG1/June 2022 stat sex and effect size/SPSS files/SPSS Data Files/June 2022 Gait sex EF data.sav           |
|                        | Active Dataset                 | DataSet4                                                                                                                                                      |
|                        | Filter                         | <none>                                                                                                                                                        |
|                        | Weight                         | <none>                                                                                                                                                        |
|                        | Split File                     | <none>                                                                                                                                                        |
|                        | N of Rows in Working Data File | 56                                                                                                                                                            |
| Missing Value Handling | Definition of Missing          | User-defined missing values are treated as missing.                                                                                                           |
|                        | Cases Used                     | Statistics are based on all cases with valid data for all variables in the model.                                                                             |
| Syntax                 |                                | UNIANOVA<br>ForepawDiagonalCpl BY<br>GENOTYPE SEX<br>/METHOD=SSTYPE(3)<br>/INTERCEPT=INCLUDE<br>/CRITERIA=ALPHA(.05)<br>/DESIGN=GENOTYPE<br>SEX GENOTYPE*SEX. |
| Resources              | Processor Time                 | 00:00:00.01                                                                                                                                                   |
|                        | Elapsed Time                   | 00:00:00.00                                                                                                                                                   |

### Between-Subjects Factors

|          |    | N  |
|----------|----|----|
| GENOTYPE | KI | 30 |
|          | WT | 26 |
| SEX      | F  | 27 |
|          | M  | 29 |

## Tests of Between-Subjects Effects

Dependent Variable: ForepawDiagonalCpl

| Source          | Type III Sum of Squares | df | Mean Square | F       | Sig.  |
|-----------------|-------------------------|----|-------------|---------|-------|
| Corrected Model | .002 <sup>a</sup>       | 3  | .001        | .671    | .574  |
| Intercept       | .234                    | 1  | .234        | 222.835 | <.001 |
| GENOTYPE        | .002                    | 1  | .002        | 1.561   | .217  |
| SEX             | .001                    | 1  | .001        | .597    | .443  |
| GENOTYPE * SEX  | 4.217E-5                | 1  | 4.217E-5    | .040    | .842  |
| Error           | .055                    | 52 | .001        |         |       |
| Total           | .297                    | 56 |             |         |       |
| Corrected Total | .057                    | 55 |             |         |       |

a. R Squared = .037 (Adjusted R Squared = -.018)

```
UNIANOVA HindpawHomolatCplBY GENOTYPE SEX
/METHOD=SSTYPE(3)
/INTERCEPT=INCLUDE
/CRITERIA=ALPHA(.05)
/DESIGN=GENOTYPE SEX GENOTYPE*SEX.
```

## Univariate Analysis of Variance

## Notes

|                        |                                |                                                                                                                                                              |
|------------------------|--------------------------------|--------------------------------------------------------------------------------------------------------------------------------------------------------------|
| Output Created         |                                | 22-AUG-2022 14:57:...                                                                                                                                        |
| Comments               |                                |                                                                                                                                                              |
| Input                  | Data                           | /Users/jeffneul/Jeff's Research/Neul Manuscripts/FoxG1/June 2022 stat sex and effect size/SPSS files/SPSS Data Files/June 2022 Gait sex EF data.sav          |
|                        | Active Dataset                 | DataSet4                                                                                                                                                     |
|                        | Filter                         | <none>                                                                                                                                                       |
|                        | Weight                         | <none>                                                                                                                                                       |
|                        | Split File                     | <none>                                                                                                                                                       |
|                        | N of Rows in Working Data File | 56                                                                                                                                                           |
| Missing Value Handling | Definition of Missing          | User-defined missing values are treated as missing.                                                                                                          |
|                        | Cases Used                     | Statistics are based on all cases with valid data for all variables in the model.                                                                            |
| Syntax                 |                                | UNIANOVA<br>HindpawHomolatCpl BY<br>GENOTYPE SEX<br>/METHOD=SSTYPE(3)<br>/INTERCEPT=INCLUDE<br>/CRITERIA=ALPHA(.05)<br>/DESIGN=GENOTYPE<br>SEX GENOTYPE*SEX. |
| Resources              | Processor Time                 | 00:00:00.01                                                                                                                                                  |
|                        | Elapsed Time                   | 00:00:00.00                                                                                                                                                  |

### Between-Subjects Factors

|          |    | N  |
|----------|----|----|
| GENOTYPE | KI | 30 |
|          | WT | 26 |
| SEX      | F  | 27 |
|          | M  | 29 |

## Tests of Between-Subjects Effects

Dependent Variable: HindpawHomolatCpl

| Source          | Type III Sum of Squares | df | Mean Square | F        | Sig.  |
|-----------------|-------------------------|----|-------------|----------|-------|
| Corrected Model | .009 <sup>a</sup>       | 3  | .003        | 2.295    | .089  |
| Intercept       | 10.962                  | 1  | 10.962      | 7959.130 | <.001 |
| GENOTYPE        | .009                    | 1  | .009        | 6.803    | .012  |
| SEX             | .000                    | 1  | .000        | .216     | .644  |
| GENOTYPE * SEX  | 3.743E-5                | 1  | 3.743E-5    | .027     | .870  |
| Error           | .072                    | 52 | .001        |          |       |
| Total           | 11.181                  | 56 |             |          |       |
| Corrected Total | .081                    | 55 |             |          |       |

a. R Squared = .117 (Adjusted R Squared = .066)

```
UNIANOVA HindpawHomologCpl BY GENOTYPE SEX
/METHOD=SSTYPE(3)
/INTERCEPT=INCLUDE
/CRITERIA=ALPHA(.05)
/DESIGN=GENOTYPE SEX GENOTYPE*SEX.
```

## Univariate Analysis of Variance

## Notes

|                        |                                |                                                                                                                                                              |
|------------------------|--------------------------------|--------------------------------------------------------------------------------------------------------------------------------------------------------------|
| Output Created         |                                | 22-AUG-2022 14:58:...                                                                                                                                        |
| Comments               |                                |                                                                                                                                                              |
| Input                  | Data                           | /Users/jeffneul/Jeff's Research/Neul Manuscripts/FoxG1/June 2022 stat sex and effect size/SPSS files/SPSS Data Files/June 2022 Gait sex EF data.sav          |
|                        | Active Dataset                 | DataSet4                                                                                                                                                     |
|                        | Filter                         | <none>                                                                                                                                                       |
|                        | Weight                         | <none>                                                                                                                                                       |
|                        | Split File                     | <none>                                                                                                                                                       |
|                        | N of Rows in Working Data File | 56                                                                                                                                                           |
| Missing Value Handling | Definition of Missing          | User-defined missing values are treated as missing.                                                                                                          |
|                        | Cases Used                     | Statistics are based on all cases with valid data for all variables in the model.                                                                            |
| Syntax                 |                                | UNIANOVA<br>HindpawHomologCpl BY<br>GENOTYPE SEX<br>/METHOD=SSTYPE(3)<br>/INTERCEPT=INCLUDE<br>/CRITERIA=ALPHA(.05)<br>/DESIGN=GENOTYPE<br>SEX GENOTYPE*SEX. |
| Resources              | Processor Time                 | 00:00:00.01                                                                                                                                                  |
|                        | Elapsed Time                   | 00:00:00.00                                                                                                                                                  |

### Between-Subjects Factors

|          |    | N  |
|----------|----|----|
| GENOTYPE | KI | 30 |
|          | WT | 26 |
| SEX      | F  | 27 |
|          | M  | 29 |

## Tests of Between-Subjects Effects

Dependent Variable: HindpawHomologCpl

| Source          | Type III Sum of Squares | df | Mean Square | F         | Sig.  |
|-----------------|-------------------------|----|-------------|-----------|-------|
| Corrected Model | .002 <sup>a</sup>       | 3  | .001        | 1.912     | .139  |
| Intercept       | 13.026                  | 1  | 13.026      | 49222.401 | <.001 |
| GENOTYPE        | .001                    | 1  | .001        | 5.380     | .024  |
| SEX             | 5.734E-5                | 1  | 5.734E-5    | .217      | .644  |
| GENOTYPE * SEX  | 8.998E-5                | 1  | 8.998E-5    | .340      | .562  |
| Error           | .014                    | 52 | .000        |           |       |
| Total           | 13.250                  | 56 |             |           |       |
| Corrected Total | .015                    | 55 |             |           |       |

a. R Squared = .099 (Adjusted R Squared = .047)

```
UNIANOVA HindpawDiagonalCplBY GENOTYPE SEX
/METHOD=SSTYPE(3)
/INTERCEPT=INCLUDE
/CRITERIA=ALPHA(.05)
/DESIGN=GENOTYPE SEX GENOTYPE*SEX.
```

## Univariate Analysis of Variance

## Notes

|                        |                                |                                                                                                                                                               |
|------------------------|--------------------------------|---------------------------------------------------------------------------------------------------------------------------------------------------------------|
| Output Created         |                                | 22-AUG-2022 14:58:...                                                                                                                                         |
| Comments               |                                |                                                                                                                                                               |
| Input                  | Data                           | /Users/jeffneul/Jeff's Research/Neul Manuscripts/FoxG1/June 2022 stat sex and effect size/SPSS files/SPSS Data Files/June 2022 Gait sex EF data.sav           |
|                        | Active Dataset                 | DataSet4                                                                                                                                                      |
|                        | Filter                         | <none>                                                                                                                                                        |
|                        | Weight                         | <none>                                                                                                                                                        |
|                        | Split File                     | <none>                                                                                                                                                        |
|                        | N of Rows in Working Data File | 56                                                                                                                                                            |
| Missing Value Handling | Definition of Missing          | User-defined missing values are treated as missing.                                                                                                           |
|                        | Cases Used                     | Statistics are based on all cases with valid data for all variables in the model.                                                                             |
| Syntax                 |                                | UNIANOVA<br>HindpawDiagonalCpl BY<br>GENOTYPE SEX<br>/METHOD=SSTYPE(3)<br>/INTERCEPT=INCLUDE<br>/CRITERIA=ALPHA(.05)<br>/DESIGN=GENOTYPE<br>SEX GENOTYPE*SEX. |
| Resources              | Processor Time                 | 00:00:00.01                                                                                                                                                   |
|                        | Elapsed Time                   | 00:00:00.00                                                                                                                                                   |

### Between-Subjects Factors

|          |    | N  |
|----------|----|----|
| GENOTYPE | KI | 30 |
|          | WT | 26 |
| SEX      | F  | 27 |
|          | M  | 29 |

## Tests of Between-Subjects Effects

Dependent Variable: HindpawDiagonalCpl

| Source          | Type III Sum of Squares | df | Mean Square | F      | Sig.  |
|-----------------|-------------------------|----|-------------|--------|-------|
| Corrected Model | .003 <sup>a</sup>       | 3  | .001        | .608   | .613  |
| Intercept       | .031                    | 1  | .031        | 22.781 | <.001 |
| GENOTYPE        | .001                    | 1  | .001        | .515   | .476  |
| SEX             | 7.100E-5                | 1  | 7.100E-5    | .052   | .821  |
| GENOTYPE * SEX  | .002                    | 1  | .002        | 1.132  | .292  |
| Error           | .072                    | 52 | .001        |        |       |
| Total           | .108                    | 56 |             |        |       |
| Corrected Total | .074                    | 55 |             |        |       |

a. R Squared = .034 (Adjusted R Squared = -.022)

```
UNIANOVA ForepawGaitAngleBY GENOTYPE SEX  
/METHOD=SSTYPE(3)  
/INTERCEPT=INCLUDE  
/CRITERIA=ALPHA(.05)  
/DESIGN=GENOTYPE SEX GENOTYPE*SEX.
```

## Univariate Analysis of Variance



## Notes

|                        |                                |                                                                                                                                                             |
|------------------------|--------------------------------|-------------------------------------------------------------------------------------------------------------------------------------------------------------|
| Output Created         |                                | 22-AUG-2022 14:58:...                                                                                                                                       |
| Comments               |                                |                                                                                                                                                             |
| Input                  | Data                           | /Users/jeffneul/Jeff's Research/Neul Manuscripts/FoxG1/June 2022 stat sex and effect size/SPSS files/SPSS Data Files/June 2022 Gait sex EF data.sav         |
|                        | Active Dataset                 | DataSet4                                                                                                                                                    |
|                        | Filter                         | <none>                                                                                                                                                      |
|                        | Weight                         | <none>                                                                                                                                                      |
|                        | Split File                     | <none>                                                                                                                                                      |
|                        | N of Rows in Working Data File | 56                                                                                                                                                          |
| Missing Value Handling | Definition of Missing          | User-defined missing values are treated as missing.                                                                                                         |
|                        | Cases Used                     | Statistics are based on all cases with valid data for all variables in the model.                                                                           |
| Syntax                 |                                | UNIANOVA<br>ForepawGaitAngle BY<br>GENOTYPE SEX<br>/METHOD=SSTYPE(3)<br>/INTERCEPT=INCLUDE<br>/CRITERIA=ALPHA(.05)<br>/DESIGN=GENOTYPE<br>SEX GENOTYPE*SEX. |
| Resources              | Processor Time                 | 00:00:00.01                                                                                                                                                 |
|                        | Elapsed Time                   | 00:00:00.00                                                                                                                                                 |

### Between-Subjects Factors

|          |    | N  |
|----------|----|----|
| GENOTYPE | KI | 30 |
|          | WT | 26 |
| SEX      | F  | 27 |
|          | M  | 29 |

## Tests of Between-Subjects Effects

Dependent Variable: ForepawGaitAngle

| Source          | Type III Sum of Squares | df | Mean Square | F        | Sig.  |
|-----------------|-------------------------|----|-------------|----------|-------|
| Corrected Model | 97.727 <sup>a</sup>     | 3  | 32.576      | .986     | .407  |
| Intercept       | 150746.109              | 1  | 150746.109  | 4561.306 | <.001 |
| GENOTYPE        | 5.887                   | 1  | 5.887       | .178     | .675  |
| SEX             | 19.297                  | 1  | 19.297      | .584     | .448  |
| GENOTYPE * SEX  | 78.158                  | 1  | 78.158      | 2.365    | .130  |
| Error           | 1718.543                | 52 | 33.049      |          |       |
| Total           | 155853.653              | 56 |             |          |       |
| Corrected Total | 1816.269                | 55 |             |          |       |

a. R Squared = .054 (Adjusted R Squared = -.001)

```
UNIANOVA HindpawGaitAngle BY GENOTYPE SEX
/METHOD=SSTYPE(3)
/INTERCEPT=INCLUDE
/CRITERIA=ALPHA(.05)
/DESIGN=GENOTYPE SEX GENOTYPE*SEX.
```

## Univariate Analysis of Variance

## Notes

|                        |                                |                                                                                                                                                             |
|------------------------|--------------------------------|-------------------------------------------------------------------------------------------------------------------------------------------------------------|
| Output Created         |                                | 22-AUG-2022 14:58:...                                                                                                                                       |
| Comments               |                                |                                                                                                                                                             |
| Input                  | Data                           | /Users/jeffneul/Jeff's Research/Neul Manuscripts/FoxG1/June 2022 stat sex and effect size/SPSS files/SPSS Data Files/June 2022 Gait sex EF data.sav         |
|                        | Active Dataset                 | DataSet4                                                                                                                                                    |
|                        | Filter                         | <none>                                                                                                                                                      |
|                        | Weight                         | <none>                                                                                                                                                      |
|                        | Split File                     | <none>                                                                                                                                                      |
|                        | N of Rows in Working Data File | 56                                                                                                                                                          |
| Missing Value Handling | Definition of Missing          | User-defined missing values are treated as missing.                                                                                                         |
|                        | Cases Used                     | Statistics are based on all cases with valid data for all variables in the model.                                                                           |
| Syntax                 |                                | UNIANOVA<br>HindpawGaitAngle BY<br>GENOTYPE SEX<br>/METHOD=SSTYPE(3)<br>/INTERCEPT=INCLUDE<br>/CRITERIA=ALPHA(.05)<br>/DESIGN=GENOTYPE<br>SEX GENOTYPE*SEX. |
| Resources              | Processor Time                 | 00:00:00.01                                                                                                                                                 |
|                        | Elapsed Time                   | 00:00:00.00                                                                                                                                                 |

### Between-Subjects Factors

|          |    | N  |
|----------|----|----|
| GENOTYPE | KI | 30 |
|          | WT | 26 |
| SEX      | F  | 27 |
|          | M  | 29 |

## Tests of Between-Subjects Effects

Dependent Variable: HindpawGaitAngle

| Source          | Type III Sum of Squares | df | Mean Square | F        | Sig.  |
|-----------------|-------------------------|----|-------------|----------|-------|
| Corrected Model | 37.753 <sup>a</sup>     | 3  | 12.584      | .296     | .828  |
| Intercept       | 226237.050              | 1  | 226237.050  | 5318.746 | <.001 |
| GENOTYPE        | 15.749                  | 1  | 15.749      | .370     | .546  |
| SEX             | 12.023                  | 1  | 12.023      | .283     | .597  |
| GENOTYPE * SEX  | 13.387                  | 1  | 13.387      | .315     | .577  |
| Error           | 2211.861                | 52 | 42.536      |          |       |
| Total           | 231749.603              | 56 |             |          |       |
| Corrected Total | 2249.615                | 55 |             |          |       |

a. R Squared = .017 (Adjusted R Squared = -.040)

```
UNIANOVA BdyRotdeg BY GENOTYPE SEX
/METHOD=SSTYPE(3)
/INTERCEPT=INCLUDE
/CRITERIA=ALPHA(.05)
/DESIGN=GENOTYPE SEX GENOTYPE*SEX.
```

## Univariate Analysis of Variance

## Notes

|                        |                                |                                                                                                                                                     |
|------------------------|--------------------------------|-----------------------------------------------------------------------------------------------------------------------------------------------------|
| Output Created         |                                | 22-AUG-2022 14:59:...                                                                                                                               |
| Comments               |                                |                                                                                                                                                     |
| Input                  | Data                           | /Users/jeffneul/Jeff's Research/Neul Manuscripts/FoxG1/June 2022 stat sex and effect size/SPSS files/SPSS Data Files/June 2022 Gait sex EF data.sav |
|                        | Active Dataset                 | DataSet4                                                                                                                                            |
|                        | Filter                         | <none>                                                                                                                                              |
|                        | Weight                         | <none>                                                                                                                                              |
|                        | Split File                     | <none>                                                                                                                                              |
|                        | N of Rows in Working Data File | 56                                                                                                                                                  |
| Missing Value Handling | Definition of Missing          | User-defined missing values are treated as missing.                                                                                                 |
|                        | Cases Used                     | Statistics are based on all cases with valid data for all variables in the model.                                                                   |
| Syntax                 |                                | UNIANOVA BdyRotdeg BY GENOTYPE SEX /METHOD=SSTYPE(3) /INTERCEPT=INCLUDE /CRITERIA=ALPHA(.05) /DESIGN=GENOTYPE SEX GENOTYPE*SEX.                     |
| Resources              | Processor Time                 | 00:00:00.01                                                                                                                                         |
|                        | Elapsed Time                   | 00:00:00.00                                                                                                                                         |

### Between-Subjects Factors

|          |    | N  |
|----------|----|----|
| GENOTYPE | KI | 30 |
|          | WT | 26 |
| SEX      | F  | 27 |
|          | M  | 29 |

## Tests of Between-Subjects Effects

Dependent Variable: BdyRot(deg)

| Source          | Type III Sum of Squares | df | Mean Square | F      | Sig.  |
|-----------------|-------------------------|----|-------------|--------|-------|
| Corrected Model | 70.842 <sup>a</sup>     | 3  | 23.614      | 3.726  | .017  |
| Intercept       | 151.435                 | 1  | 151.435     | 23.892 | <.001 |
| GENOTYPE        | 67.057                  | 1  | 67.057      | 10.580 | .002  |
| SEX             | .207                    | 1  | .207        | .033   | .857  |
| GENOTYPE * SEX  | 4.418                   | 1  | 4.418       | .697   | .408  |
| Error           | 329.596                 | 52 | 6.338       |        |       |
| Total           | 563.129                 | 56 |             |        |       |
| Corrected Total | 400.438                 | 55 |             |        |       |

a. R Squared = .177 (Adjusted R Squared = .129)

```
UNIANOVA LongitdPosmm BY GENOTYPE SEX  
/METHOD=SSTYPE(3)  
/INTERCEPT=INCLUDE  
/CRITERIA=ALPHA(.05)  
/DESIGN=GENOTYPE SEX GENOTYPE*SEX.
```

## Univariate Analysis of Variance

## Notes

|                        |                                |                                                                                                                                                         |
|------------------------|--------------------------------|---------------------------------------------------------------------------------------------------------------------------------------------------------|
| Output Created         |                                | 22-AUG-2022 14:59:...                                                                                                                                   |
| Comments               |                                |                                                                                                                                                         |
| Input                  | Data                           | /Users/jeffneul/Jeff's Research/Neul Manuscripts/FoxG1/June 2022 stat sex and effect size/SPSS files/SPSS Data Files/June 2022 Gait sex EF data.sav     |
|                        | Active Dataset                 | DataSet4                                                                                                                                                |
|                        | Filter                         | <none>                                                                                                                                                  |
|                        | Weight                         | <none>                                                                                                                                                  |
|                        | Split File                     | <none>                                                                                                                                                  |
|                        | N of Rows in Working Data File | 56                                                                                                                                                      |
| Missing Value Handling | Definition of Missing          | User-defined missing values are treated as missing.                                                                                                     |
|                        | Cases Used                     | Statistics are based on all cases with valid data for all variables in the model.                                                                       |
| Syntax                 |                                | UNIANOVA<br>LongitdPosmm BY<br>GENOTYPE SEX<br>/METHOD=SSTYPE(3)<br>/INTERCEPT=INCLUDE<br>/CRITERIA=ALPHA(.05)<br>/DESIGN=GENOTYPE<br>SEX GENOTYPE*SEX. |
| Resources              | Processor Time                 | 00:00:00.01                                                                                                                                             |
|                        | Elapsed Time                   | 00:00:00.00                                                                                                                                             |

### Between-Subjects Factors

|          |    | N  |
|----------|----|----|
| GENOTYPE | KI | 30 |
|          | WT | 26 |
| SEX      | F  | 27 |
|          | M  | 29 |

## Tests of Between-Subjects Effects

Dependent Variable: Longitd Pos(mm)

| Source          | Type III Sum of Squares | df | Mean Square | F        | Sig.  |
|-----------------|-------------------------|----|-------------|----------|-------|
| Corrected Model | 491.782 <sup>a</sup>    | 3  | 163.927     | .587     | .626  |
| Intercept       | 438615.947              | 1  | 438615.947  | 1570.882 | <.001 |
| GENOTYPE        | 124.790                 | 1  | 124.790     | .447     | .507  |
| SEX             | 171.791                 | 1  | 171.791     | .615     | .436  |
| GENOTYPE * SEX  | 192.843                 | 1  | 192.843     | .691     | .410  |
| Error           | 14519.253               | 52 | 279.216     |          |       |
| Total           | 460688.138              | 56 |             |          |       |
| Corrected Total | 15011.036               | 55 |             |          |       |

a. R Squared = .033 (Adjusted R Squared = -.023)

```
UNIANOVA LateralPosmm BY GENOTYPE SEX
/METHOD=SSTYPE(3)
/INTERCEPT=INCLUDE
/CRITERIA=ALPHA(.05)
/DESIGN=GENOTYPE SEX GENOTYPE*SEX.
```

## Univariate Analysis of Variance



## Notes

|                        |                                |                                                                                                                                                         |
|------------------------|--------------------------------|---------------------------------------------------------------------------------------------------------------------------------------------------------|
| Output Created         |                                | 22-AUG-2022 14:59:...                                                                                                                                   |
| Comments               |                                |                                                                                                                                                         |
| Input                  | Data                           | /Users/jeffneul/Jeff's Research/Neul Manuscripts/FoxG1/June 2022 stat sex and effect size/SPSS files/SPSS Data Files/June 2022 Gait sex EF data.sav     |
|                        | Active Dataset                 | DataSet4                                                                                                                                                |
|                        | Filter                         | <none>                                                                                                                                                  |
|                        | Weight                         | <none>                                                                                                                                                  |
|                        | Split File                     | <none>                                                                                                                                                  |
|                        | N of Rows in Working Data File | 56                                                                                                                                                      |
| Missing Value Handling | Definition of Missing          | User-defined missing values are treated as missing.                                                                                                     |
|                        | Cases Used                     | Statistics are based on all cases with valid data for all variables in the model.                                                                       |
| Syntax                 |                                | UNIANOVA<br>LateralPosmm BY<br>GENOTYPE SEX<br>/METHOD=SSTYPE(3)<br>/INTERCEPT=INCLUDE<br>/CRITERIA=ALPHA(.05)<br>/DESIGN=GENOTYPE<br>SEX GENOTYPE*SEX. |
| Resources              | Processor Time                 | 00:00:00.01                                                                                                                                             |
|                        | Elapsed Time                   | 00:00:00.00                                                                                                                                             |

### Between-Subjects Factors

|          |    | N  |
|----------|----|----|
| GENOTYPE | KI | 30 |
|          | WT | 26 |
| SEX      | F  | 27 |
|          | M  | 29 |

## Tests of Between-Subjects Effects

Dependent Variable: Lateral Pos(mm)

| Source          | Type III Sum of Squares | df | Mean Square | F         | Sig.  |
|-----------------|-------------------------|----|-------------|-----------|-------|
| Corrected Model | 1.339 <sup>a</sup>      | 3  | .446        | .094      | .963  |
| Intercept       | 375670.385              | 1  | 375670.385  | 78882.673 | <.001 |
| GENOTYPE        | .581                    | 1  | .581        | .122      | .728  |
| SEX             | .702                    | 1  | .702        | .147      | .703  |
| GENOTYPE * SEX  | .206                    | 1  | .206        | .043      | .836  |
| Error           | 247.644                 | 52 | 4.762       |           |       |
| Total           | 382131.935              | 56 |             |           |       |
| Corrected Total | 248.983                 | 55 |             |           |       |

a. R Squared = .005 (Adjusted R Squared = -.052)

```
UNIANOVA ForepawStridems BY GENOTYPE SEX
/METHOD=SSTYPE(3)
/INTERCEPT=INCLUDE
/EMMEANS=TABLES(GENOTYPE)
/EMMEANS=TABLES(SEX)
/PRINT ETASQ
/CRITERIA=ALPHA(.05)
/DESIGN=GENOTYPE SEX.
```

## Univariate Analysis of Variance

## Notes

|                        |                                |                                                                                                                                                                                                     |
|------------------------|--------------------------------|-----------------------------------------------------------------------------------------------------------------------------------------------------------------------------------------------------|
| Output Created         |                                | 22-AUG-2022 15:00:...                                                                                                                                                                               |
| Comments               |                                |                                                                                                                                                                                                     |
| Input                  | Data                           | /Users/jeffneul/Jeff's Research/Neul Manuscripts/FoxG1/June 2022 stat sex and effect size/SPSS files/SPSS Data Files/June 2022 Gait sex EF data.sav                                                 |
|                        | Active Dataset                 | DataSet4                                                                                                                                                                                            |
|                        | Filter                         | <none>                                                                                                                                                                                              |
|                        | Weight                         | <none>                                                                                                                                                                                              |
|                        | Split File                     | <none>                                                                                                                                                                                              |
|                        | N of Rows in Working Data File | 56                                                                                                                                                                                                  |
| Missing Value Handling | Definition of Missing          | User-defined missing values are treated as missing.                                                                                                                                                 |
|                        | Cases Used                     | Statistics are based on all cases with valid data for all variables in the model.                                                                                                                   |
| Syntax                 |                                | <pre> UNIANOVA ForepawStridems BY GENOTYPE SEX /METHOD=SSTYPE(3) /INTERCEPT=INCLUDE /EMMEANS=TABLES (GENOTYPE) /EMMEANS=TABLES (SEX) /PRINT ETASQ /CRITERIA=ALPHA(.05) /DESIGN=GENOTYPE SEX. </pre> |
| Resources              | Processor Time                 | 00:00:00.01                                                                                                                                                                                         |
|                        | Elapsed Time                   | 00:00:00.00                                                                                                                                                                                         |

### Between-Subjects Factors

|          |    | N  |
|----------|----|----|
| GENOTYPE | KI | 30 |
|          | WT | 26 |
| SEX      | F  | 27 |
|          | M  | 29 |

## Tests of Between-Subjects Effects

Dependent Variable: ForepawStride (ms)

| Source          | Type III Sum of Squares | df | Mean Square | F        | Sig.  | Partial Eta Squared |
|-----------------|-------------------------|----|-------------|----------|-------|---------------------|
| Corrected Model | 3130.361 <sup>a</sup>   | 2  | 1565.180    | 1.836    | .169  | .065                |
| Intercept       | 4180790.32              | 1  | 4180790.32  | 4903.717 | <.001 | .989                |
| GENOTYPE        | 2421.313                | 1  | 2421.313    | 2.840    | .098  | .051                |
| SEX             | 1001.347                | 1  | 1001.347    | 1.174    | .283  | .022                |
| Error           | 45186.519               | 53 | 852.576     |          |       |                     |
| Total           | 4244051.19              | 56 |             |          |       |                     |
| Corrected Total | 48316.879               | 55 |             |          |       |                     |

a. R Squared = .065 (Adjusted R Squared = .029)

## Estimated Marginal Means

### 1. GENOTYPE

Dependent Variable: ForepawStride (ms)

| GENOTYPE | Mean    | Std. Error | 95% Confidence Interval |             |
|----------|---------|------------|-------------------------|-------------|
|          |         |            | Lower Bound             | Upper Bound |
| KI       | 267.415 | 5.357      | 256.671                 | 278.159     |
| WT       | 280.673 | 5.734      | 269.171                 | 292.174     |

### 2. SEX

Dependent Variable: ForepawStride (ms)

| SEX | Mean    | Std. Error | 95% Confidence Interval |             |
|-----|---------|------------|-------------------------|-------------|
|     |         |            | Lower Bound             | Upper Bound |
| F   | 269.789 | 5.621      | 258.514                 | 281.064     |
| M   | 278.299 | 5.464      | 267.338                 | 289.259     |

```

UNIANOVA ForepawPercofSwingBY GENOTYPE SEX
/METHOD=SSTYPE(3)
/INTERCEPT=INCLUDE
/EMMEANS=TABLES(GENOTYPE)
/EMMEANS=TABLES(SEX)
/PRINT ETASQ
/CRITERIA=ALPHA(.05)
/DESIGN=GENOTYPE SEX.
    
```

## Univariate Analysis of Variance

## Notes

|                        |                                |                                                                                                                                                                                                        |
|------------------------|--------------------------------|--------------------------------------------------------------------------------------------------------------------------------------------------------------------------------------------------------|
| Output Created         |                                | 22-AUG-2022 15:00:...                                                                                                                                                                                  |
| Comments               |                                |                                                                                                                                                                                                        |
| Input                  | Data                           | /Users/jeffneul/Jeff's Research/Neul Manuscripts/FoxG1/June 2022 stat sex and effect size/SPSS files/SPSS Data Files/June 2022 Gait sex EF data.sav                                                    |
|                        | Active Dataset                 | DataSet4                                                                                                                                                                                               |
|                        | Filter                         | <none>                                                                                                                                                                                                 |
|                        | Weight                         | <none>                                                                                                                                                                                                 |
|                        | Split File                     | <none>                                                                                                                                                                                                 |
|                        | N of Rows in Working Data File | 56                                                                                                                                                                                                     |
| Missing Value Handling | Definition of Missing          | User-defined missing values are treated as missing.                                                                                                                                                    |
|                        | Cases Used                     | Statistics are based on all cases with valid data for all variables in the model.                                                                                                                      |
| Syntax                 |                                | <pre> UNIANOVA ForepawPercofSwing BY GENOTYPE SEX /METHOD=SSTYPE(3) /INTERCEPT=INCLUDE /EMMEANS=TABLES (GENOTYPE) /EMMEANS=TABLES (SEX) /PRINT ETASQ /CRITERIA=ALPHA(.05) /DESIGN=GENOTYPE SEX. </pre> |
| Resources              | Processor Time                 | 00:00:00.02                                                                                                                                                                                            |
|                        | Elapsed Time                   | 00:00:00.00                                                                                                                                                                                            |

### Between-Subjects Factors

|          |    | N  |
|----------|----|----|
| GENOTYPE | KI | 30 |
|          | WT | 26 |
| SEX      | F  | 27 |
|          | M  | 29 |

### Tests of Between-Subjects Effects

Dependent Variable: ForepawPercofSwing

| Source          | Type III Sum of Squares | df | Mean Square | F         | Sig.  |
|-----------------|-------------------------|----|-------------|-----------|-------|
| Corrected Model | .008 <sup>a</sup>       | 2  | .004        | 3.762     | .030  |
| Intercept       | 14.220                  | 1  | 14.220      | 12878.060 | <.001 |
| GENOTYPE        | .008                    | 1  | .008        | 7.183     | .010  |
| SEX             | .001                    | 1  | .001        | .743      | .393  |
| Error           | .059                    | 53 | .001        |           |       |
| Total           | 14.412                  | 56 |             |           |       |
| Corrected Total | .067                    | 55 |             |           |       |

### Tests of Between-Subjects Effects

Dependent Variable: ForepawPercofSwing

| Source          | Partial Eta Squared |
|-----------------|---------------------|
| Corrected Model | .124                |
| Intercept       | .996                |
| GENOTYPE        | .119                |
| SEX             | .014                |
| Error           |                     |
| Total           |                     |
| Corrected Total |                     |

a. R Squared = .124 (Adjusted R Squared = .091)

## Estimated Marginal Means

### 1. GENOTYPE

Dependent Variable: ForepawPercofSwing

| GENOTYPE | Mean | Std. Error | 95% Confidence Interval |             |
|----------|------|------------|-------------------------|-------------|
|          |      |            | Lower Bound             | Upper Bound |
| KI       | .517 | .006       | .505                    | .530        |
| WT       | .493 | .007       | .480                    | .506        |

## 2. SEX

Dependent Variable: ForepawPercofSwing

| SEX | Mean | Std. Error | 95% Confidence Interval |             |
|-----|------|------------|-------------------------|-------------|
|     |      |            | Lower Bound             | Upper Bound |
| F   | .509 | .006       | .496                    | .522        |
| M   | .502 | .006       | .489                    | .514        |

```

UNIANOVA ForepawStrideLenmmBY GENOTYPE SEX
/METHOD=SSTYPE(3)
/INTERCEPT=INCLUDE
/EMMEANS=TABLES(GENOTYPE)
/EMMEANS=TABLES(SEX)
/PRINT ETASQ
/CRITERIA=ALPHA(.05)
/DESIGN=GENOTYPE SEX.

```

## Univariate Analysis of Variance

### Notes

|                        |                                |                                                                                                                                                     |
|------------------------|--------------------------------|-----------------------------------------------------------------------------------------------------------------------------------------------------|
| Output Created         |                                | 22-AUG-2022 15:01:...                                                                                                                               |
| Comments               |                                |                                                                                                                                                     |
| Input                  | Data                           | /Users/jeffneul/Jeff's Research/Neul Manuscripts/FoxG1/June 2022 stat sex and effect size/SPSS files/SPSS Data Files/June 2022 Gait sex EF data.sav |
|                        | Active Dataset                 | DataSet4                                                                                                                                            |
|                        | Filter                         | <none>                                                                                                                                              |
|                        | Weight                         | <none>                                                                                                                                              |
|                        | Split File                     | <none>                                                                                                                                              |
|                        | N of Rows in Working Data File | 56                                                                                                                                                  |
| Missing Value Handling | Definition of Missing          | User-defined missing values are treated as missing.                                                                                                 |
|                        | Cases Used                     | Statistics are based on all cases with valid data for all variables in the model.                                                                   |

## Notes

|           |                                                                                                                                                                                                                               |             |
|-----------|-------------------------------------------------------------------------------------------------------------------------------------------------------------------------------------------------------------------------------|-------------|
| Syntax    | UNIANOVA<br>ForepawStrideLenmm BY<br>GENOTYPE SEX<br>/METHOD=SSTYPE(3)<br>/INTERCEPT=INCLUDE<br>/EMMEANS=TABLES<br>(GENOTYPE)<br>/EMMEANS=TABLES<br>(SEX)<br>/PRINT ETASQ<br>/CRITERIA=ALPHA(.05)<br>/DESIGN=GENOTYPE<br>SEX. |             |
| Resources | Processor Time                                                                                                                                                                                                                | 00:00:00.02 |
|           | Elapsed Time                                                                                                                                                                                                                  | 00:00:00.00 |

### Between-Subjects Factors

|          |    | N  |
|----------|----|----|
| GENOTYPE | KI | 30 |
|          | WT | 26 |
| SEX      | F  | 27 |
|          | M  | 29 |

### Tests of Between-Subjects Effects

Dependent Variable: ForepawStrideLen (mm)

| Source          | Type III Sum of Squares | df | Mean Square | F         | Sig.  |
|-----------------|-------------------------|----|-------------|-----------|-------|
| Corrected Model | 55.541 <sup>a</sup>     | 2  | 27.771      | 2.145     | .127  |
| Intercept       | 196768.115              | 1  | 196768.115  | 15199.000 | <.001 |
| GENOTYPE        | 24.110                  | 1  | 24.110      | 1.862     | .178  |
| SEX             | 25.605                  | 1  | 25.605      | 1.978     | .165  |
| Error           | 686.145                 | 53 | 12.946      |           |       |
| Total           | 199154.050              | 56 |             |           |       |
| Corrected Total | 741.686                 | 55 |             |           |       |



## Tests of Between-Subjects Effects

Dependent Variable: ForepawStrideLen (mm)

| Source          | Partial Eta Squared |
|-----------------|---------------------|
| Corrected Model | .075                |
| Intercept       | .997                |
| GENOTYPE        | .034                |
| SEX             | .036                |
| Error           |                     |
| Total           |                     |
| Corrected Total |                     |

a. R Squared = .075 (Adjusted R Squared = .040)

## Estimated Marginal Means

### 1. GENOTYPE

Dependent Variable: ForepawStrideLen (mm)

| GENOTYPE | Mean   | Std. Error | 95% Confidence Interval |             |
|----------|--------|------------|-------------------------|-------------|
|          |        |            | Lower Bound             | Upper Bound |
| KI       | 60.114 | .660       | 58.790                  | 61.438      |
| WT       | 58.791 | .707       | 57.373                  | 60.208      |

### 2. SEX

Dependent Variable: ForepawStrideLen (mm)

| SEX | Mean   | Std. Error | 95% Confidence Interval |             |
|-----|--------|------------|-------------------------|-------------|
|     |        |            | Lower Bound             | Upper Bound |
| F   | 58.772 | .693       | 57.382                  | 60.161      |
| M   | 60.133 | .673       | 58.782                  | 61.483      |

```
UNIANOVA ForepawAvPrintAreaBY GENOTYPE SEX
/METHOD=SSTYPE(3)
/INTERCEPT=INCLUDE
/EMMEANS=TABLES(GENOTYPE)
/EMMEANS=TABLES(SEX)
/PRINT ETASQ
/CRITERIA=ALPHA(.05)
/DESIGN=GENOTYPE SEX.
```

## Univariate Analysis of Variance

## Notes

|                        |                                |                                                                                                                                                                                                        |
|------------------------|--------------------------------|--------------------------------------------------------------------------------------------------------------------------------------------------------------------------------------------------------|
| Output Created         |                                | 22-AUG-2022 15:01:...                                                                                                                                                                                  |
| Comments               |                                |                                                                                                                                                                                                        |
| Input                  | Data                           | /Users/jeffneul/Jeff's Research/Neul Manuscripts/FoxG1/June 2022 stat sex and effect size/SPSS files/SPSS Data Files/June 2022 Gait sex EF data.sav                                                    |
|                        | Active Dataset                 | DataSet4                                                                                                                                                                                               |
|                        | Filter                         | <none>                                                                                                                                                                                                 |
|                        | Weight                         | <none>                                                                                                                                                                                                 |
|                        | Split File                     | <none>                                                                                                                                                                                                 |
|                        | N of Rows in Working Data File | 56                                                                                                                                                                                                     |
| Missing Value Handling | Definition of Missing          | User-defined missing values are treated as missing.                                                                                                                                                    |
|                        | Cases Used                     | Statistics are based on all cases with valid data for all variables in the model.                                                                                                                      |
| Syntax                 |                                | <pre> UNIANOVA ForepawAvPrintArea BY GENOTYPE SEX /METHOD=SSTYPE(3) /INTERCEPT=INCLUDE /EMMEANS=TABLES (GENOTYPE) /EMMEANS=TABLES (SEX) /PRINT ETASQ /CRITERIA=ALPHA(.05) /DESIGN=GENOTYPE SEX. </pre> |
| Resources              | Processor Time                 | 00:00:00.02                                                                                                                                                                                            |
|                        | Elapsed Time                   | 00:00:00.00                                                                                                                                                                                            |

### Between-Subjects Factors

|          |    | N  |
|----------|----|----|
| GENOTYPE | KI | 30 |
|          | WT | 26 |
| SEX      | F  | 27 |
|          | M  | 29 |

## Tests of Between-Subjects Effects

Dependent Variable: ForepawAvPrintArea

| Source          | Type III Sum of Squares | df | Mean Square | F        | Sig.  | Partial Eta Squared |
|-----------------|-------------------------|----|-------------|----------|-------|---------------------|
| Corrected Model | 8709.415 <sup>a</sup>   | 2  | 4354.707    | 5.601    | .006  | .174                |
| Intercept       | 1143510.18              | 1  | 1143510.18  | 1470.814 | <.001 | .965                |
| GENOTYPE        | 5168.032                | 1  | 5168.032    | 6.647    | .013  | .111                |
| SEX             | 4452.105                | 1  | 4452.105    | 5.726    | .020  | .098                |
| Error           | 41205.794               | 53 | 777.468     |          |       |                     |
| Total           | 1194257.43              | 56 |             |          |       |                     |
| Corrected Total | 49915.208               | 55 |             |          |       |                     |

a. R Squared = .174 (Adjusted R Squared = .143)

## Estimated Marginal Means

### 1. GENOTYPE

Dependent Variable: ForepawAvPrintArea

| GENOTYPE | Mean    | Std. Error | 95% Confidence Interval |             |
|----------|---------|------------|-------------------------|-------------|
|          |         |            | Lower Bound             | Upper Bound |
| KI       | 133.637 | 5.115      | 123.377                 | 143.896     |
| WT       | 153.006 | 5.476      | 142.023                 | 163.989     |

### 2. SEX

Dependent Variable: ForepawAvPrintArea

| SEX | Mean    | Std. Error | 95% Confidence Interval |             |
|-----|---------|------------|-------------------------|-------------|
|     |         |            | Lower Bound             | Upper Bound |
| F   | 134.350 | 5.368      | 123.583                 | 145.116     |
| M   | 152.293 | 5.218      | 141.827                 | 162.759     |

```
UNIANOVA HindpawStridems BY GENOTYPE SEX
/METHOD=SSTYPE(3)
/INTERCEPT=INCLUDE
/EMMEANS=TABLES(GENOTYPE)
/EMMEANS=TABLES(SEX)
/PRINT ETASQ
/CRITERIA=ALPHA(.05)
/DESIGN=GENOTYPE SEX.
```

## Univariate Analysis of Variance

## Notes

|                        |                                |                                                                                                                                                                                                     |
|------------------------|--------------------------------|-----------------------------------------------------------------------------------------------------------------------------------------------------------------------------------------------------|
| Output Created         |                                | 22-AUG-2022 15:01:...                                                                                                                                                                               |
| Comments               |                                |                                                                                                                                                                                                     |
| Input                  | Data                           | /Users/jeffneul/Jeff's Research/Neul Manuscripts/FoxG1/June 2022 stat sex and effect size/SPSS files/SPSS Data Files/June 2022 Gait sex EF data.sav                                                 |
|                        | Active Dataset                 | DataSet4                                                                                                                                                                                            |
|                        | Filter                         | <none>                                                                                                                                                                                              |
|                        | Weight                         | <none>                                                                                                                                                                                              |
|                        | Split File                     | <none>                                                                                                                                                                                              |
|                        | N of Rows in Working Data File | 56                                                                                                                                                                                                  |
| Missing Value Handling | Definition of Missing          | User-defined missing values are treated as missing.                                                                                                                                                 |
|                        | Cases Used                     | Statistics are based on all cases with valid data for all variables in the model.                                                                                                                   |
| Syntax                 |                                | <pre> UNIANOVA HindpawStridems BY GENOTYPE SEX /METHOD=SSTYPE(3) /INTERCEPT=INCLUDE /EMMEANS=TABLES (GENOTYPE) /EMMEANS=TABLES (SEX) /PRINT ETASQ /CRITERIA=ALPHA(.05) /DESIGN=GENOTYPE SEX. </pre> |
| Resources              | Processor Time                 | 00:00:00.01                                                                                                                                                                                         |
|                        | Elapsed Time                   | 00:00:00.00                                                                                                                                                                                         |

### Between-Subjects Factors

|          |    | N  |
|----------|----|----|
| GENOTYPE | KI | 30 |
|          | WT | 26 |
| SEX      | F  | 27 |
|          | M  | 29 |

## Tests of Between-Subjects Effects

Dependent Variable: HindpawStride (ms)

| Source          | Type III Sum of Squares | df | Mean Square | F        | Sig.  | Partial Eta Squared |
|-----------------|-------------------------|----|-------------|----------|-------|---------------------|
| Corrected Model | 297.315 <sup>a</sup>    | 2  | 148.658     | .168     | .845  | .006                |
| Intercept       | 4472282.35              | 1  | 4472282.35  | 5065.008 | <.001 | .990                |
| GENOTYPE        | 27.172                  | 1  | 27.172      | .031     | .861  | .001                |
| SEX             | 249.589                 | 1  | 249.589     | .283     | .597  | .005                |
| Error           | 46797.750               | 53 | 882.976     |          |       |                     |
| Total           | 4541914.50              | 56 |             |          |       |                     |
| Corrected Total | 47095.066               | 55 |             |          |       |                     |

a. R Squared = .006 (Adjusted R Squared = -.031)

## Estimated Marginal Means

### 1. GENOTYPE

Dependent Variable: HindpawStride (ms)

| GENOTYPE | Mean    | Std. Error | 95% Confidence Interval |             |
|----------|---------|------------|-------------------------|-------------|
|          |         |            | Lower Bound             | Upper Bound |
| KI       | 282.734 | 5.451      | 271.800                 | 293.668     |
| WT       | 284.138 | 5.836      | 272.434                 | 295.843     |

### 2. SEX

Dependent Variable: HindpawStride (ms)

| SEX | Mean    | Std. Error | 95% Confidence Interval |             |
|-----|---------|------------|-------------------------|-------------|
|     |         |            | Lower Bound             | Upper Bound |
| F   | 285.560 | 5.721      | 274.086                 | 297.034     |
| M   | 281.312 | 5.561      | 270.158                 | 292.466     |

```
UNIANOVA HindpawPercofSwingBY GENOTYPE SEX
/METHOD=SSTYPE(3)
/INTERCEPT=INCLUDE
/EMMEANS=TABLES(GENOTYPE)
/EMMEANS=TABLES(SEX)
/PRINT ETASQ
/CRITERIA=ALPHA(.05)
/DESIGN=GENOTYPE SEX.
```

## Univariate Analysis of Variance

## Notes

|                        |                                |                                                                                                                                                                                                        |
|------------------------|--------------------------------|--------------------------------------------------------------------------------------------------------------------------------------------------------------------------------------------------------|
| Output Created         |                                | 22-AUG-2022 15:01:...                                                                                                                                                                                  |
| Comments               |                                |                                                                                                                                                                                                        |
| Input                  | Data                           | /Users/jeffneul/Jeff's Research/Neul Manuscripts/FoxG1/June 2022 stat sex and effect size/SPSS files/SPSS Data Files/June 2022 Gait sex EF data.sav                                                    |
|                        | Active Dataset                 | DataSet4                                                                                                                                                                                               |
|                        | Filter                         | <none>                                                                                                                                                                                                 |
|                        | Weight                         | <none>                                                                                                                                                                                                 |
|                        | Split File                     | <none>                                                                                                                                                                                                 |
|                        | N of Rows in Working Data File | 56                                                                                                                                                                                                     |
| Missing Value Handling | Definition of Missing          | User-defined missing values are treated as missing.                                                                                                                                                    |
|                        | Cases Used                     | Statistics are based on all cases with valid data for all variables in the model.                                                                                                                      |
| Syntax                 |                                | <pre> UNIANOVA HindpawPercofSwing BY GENOTYPE SEX /METHOD=SSTYPE(3) /INTERCEPT=INCLUDE /EMMEANS=TABLES (GENOTYPE) /EMMEANS=TABLES (SEX) /PRINT ETASQ /CRITERIA=ALPHA(.05) /DESIGN=GENOTYPE SEX. </pre> |
| Resources              | Processor Time                 | 00:00:00.02                                                                                                                                                                                            |
|                        | Elapsed Time                   | 00:00:00.00                                                                                                                                                                                            |

### Between-Subjects Factors

|          |    | N  |
|----------|----|----|
| GENOTYPE | KI | 30 |
|          | WT | 26 |
| SEX      | F  | 27 |
|          | M  | 29 |

## Tests of Between-Subjects Effects

Dependent Variable: HindpawPercofSwing

| Source          | Type III Sum of Squares | df | Mean Square | F        | Sig.  | Partial Eta Squared |
|-----------------|-------------------------|----|-------------|----------|-------|---------------------|
| Corrected Model | .024 <sup>a</sup>       | 2  | .012        | 6.426    | .003  | .195                |
| Intercept       | 16.789                  | 1  | 16.789      | 8879.548 | <.001 | .994                |
| GENOTYPE        | .022                    | 1  | .022        | 11.770   | .001  | .182                |
| SEX             | .004                    | 1  | .004        | 1.943    | .169  | .035                |
| Error           | .100                    | 53 | .002        |          |       |                     |
| Total           | 17.084                  | 56 |             |          |       |                     |
| Corrected Total | .125                    | 55 |             |          |       |                     |

a. R Squared = .195 (Adjusted R Squared = .165)

## Estimated Marginal Means

### 1. GENOTYPE

Dependent Variable: HindpawPercofSwing

| GENOTYPE | Mean | Std. Error | 95% Confidence Interval |             |
|----------|------|------------|-------------------------|-------------|
|          |      |            | Lower Bound             | Upper Bound |
| KI       | .569 | .008       | .553                    | .585        |
| WT       | .529 | .009       | .512                    | .546        |

### 2. SEX

Dependent Variable: HindpawPercofSwing

| SEX | Mean | Std. Error | 95% Confidence Interval |             |
|-----|------|------------|-------------------------|-------------|
|     |      |            | Lower Bound             | Upper Bound |
| F   | .557 | .008       | .541                    | .574        |
| M   | .541 | .008       | .525                    | .557        |

```
UNIANOVA HindpawStrideLenmmBY GENOTYPE SEX
/METHOD=SSTYPE(3)
/INTERCEPT=INCLUDE
/EMMEANS=TABLES(GENOTYPE)
/EMMEANS=TABLES(SEX)
/PRINT ETASQ
/CRITERIA=ALPHA(.05)
/DESIGN=GENOTYPE SEX.
```

## Univariate Analysis of Variance

## Notes

|                        |                                |                                                                                                                                                                                                        |
|------------------------|--------------------------------|--------------------------------------------------------------------------------------------------------------------------------------------------------------------------------------------------------|
| Output Created         |                                | 22-AUG-2022 15:02:...                                                                                                                                                                                  |
| Comments               |                                |                                                                                                                                                                                                        |
| Input                  | Data                           | /Users/jeffneul/Jeff's Research/Neul Manuscripts/FoxG1/June 2022 stat sex and effect size/SPSS files/SPSS Data Files/June 2022 Gait sex EF data.sav                                                    |
|                        | Active Dataset                 | DataSet4                                                                                                                                                                                               |
|                        | Filter                         | <none>                                                                                                                                                                                                 |
|                        | Weight                         | <none>                                                                                                                                                                                                 |
|                        | Split File                     | <none>                                                                                                                                                                                                 |
|                        | N of Rows in Working Data File | 56                                                                                                                                                                                                     |
| Missing Value Handling | Definition of Missing          | User-defined missing values are treated as missing.                                                                                                                                                    |
|                        | Cases Used                     | Statistics are based on all cases with valid data for all variables in the model.                                                                                                                      |
| Syntax                 |                                | <pre> UNIANOVA HindpawStrideLenmm BY GENOTYPE SEX /METHOD=SSTYPE(3) /INTERCEPT=INCLUDE /EMMEANS=TABLES (GENOTYPE) /EMMEANS=TABLES (SEX) /PRINT ETASQ /CRITERIA=ALPHA(.05) /DESIGN=GENOTYPE SEX. </pre> |
| Resources              | Processor Time                 | 00:00:00.02                                                                                                                                                                                            |
|                        | Elapsed Time                   | 00:00:00.00                                                                                                                                                                                            |

### Between-Subjects Factors

|          |    | N  |
|----------|----|----|
| GENOTYPE | KI | 30 |
|          | WT | 26 |
| SEX      | F  | 27 |
|          | M  | 29 |



## Tests of Between-Subjects Effects

Dependent Variable: HindpawStrideLen (mm)

| Source          | Type III Sum of Squares | df | Mean Square | F        | Sig.  | Partial Eta Squared |
|-----------------|-------------------------|----|-------------|----------|-------|---------------------|
| Corrected Model | 153.661 <sup>a</sup>    | 2  | 76.831      | 2.809    | .069  | .096                |
| Intercept       | 213753.601              | 1  | 213753.601  | 7814.084 | <.001 | .993                |
| GENOTYPE        | 149.798                 | 1  | 149.798     | 5.476    | .023  | .094                |
| SEX             | 10.491                  | 1  | 10.491      | .384     | .538  | .007                |
| Error           | 1449.810                | 53 | 27.355      |          |       |                     |
| Total           | 217335.402              | 56 |             |          |       |                     |
| Corrected Total | 1603.472                | 55 |             |          |       |                     |

a. R Squared = .096 (Adjusted R Squared = .062)

## Estimated Marginal Means

### 1. GENOTYPE

Dependent Variable: HindpawStrideLen (mm)

| GENOTYPE | Mean   | Std. Error | 95% Confidence Interval |             |
|----------|--------|------------|-------------------------|-------------|
|          |        |            | Lower Bound             | Upper Bound |
| KI       | 63.614 | .959       | 61.689                  | 65.538      |
| WT       | 60.316 | 1.027      | 58.256                  | 62.377      |

### 2. SEX

Dependent Variable: HindpawStrideLen (mm)

| SEX | Mean   | Std. Error | 95% Confidence Interval |             |
|-----|--------|------------|-------------------------|-------------|
|     |        |            | Lower Bound             | Upper Bound |
| F   | 62.401 | 1.007      | 60.381                  | 64.420      |
| M   | 61.530 | .979       | 59.566                  | 63.493      |

```
UNIANOVA HindpawAvPrintAreaBY GENOTYPE SEX
/METHOD=SSTYPE(3)
/INTERCEPT=INCLUDE
/EMMEANS=TABLES(GENOTYPE)
/EMMEANS=TABLES(SEX)
/PRINT ETASQ
/CRITERIA=ALPHA(.05)
/DESIGN=GENOTYPE SEX.
```

## Univariate Analysis of Variance

## Notes

|                        |                                |                                                                                                                                                                                                        |
|------------------------|--------------------------------|--------------------------------------------------------------------------------------------------------------------------------------------------------------------------------------------------------|
| Output Created         |                                | 22-AUG-2022 15:02:...                                                                                                                                                                                  |
| Comments               |                                |                                                                                                                                                                                                        |
| Input                  | Data                           | /Users/jeffneul/Jeff's Research/Neul Manuscripts/FoxG1/June 2022 stat sex and effect size/SPSS files/SPSS Data Files/June 2022 Gait sex EF data.sav                                                    |
|                        | Active Dataset                 | DataSet4                                                                                                                                                                                               |
|                        | Filter                         | <none>                                                                                                                                                                                                 |
|                        | Weight                         | <none>                                                                                                                                                                                                 |
|                        | Split File                     | <none>                                                                                                                                                                                                 |
|                        | N of Rows in Working Data File | 56                                                                                                                                                                                                     |
| Missing Value Handling | Definition of Missing          | User-defined missing values are treated as missing.                                                                                                                                                    |
|                        | Cases Used                     | Statistics are based on all cases with valid data for all variables in the model.                                                                                                                      |
| Syntax                 |                                | <pre> UNIANOVA HindpawAvPrintArea BY GENOTYPE SEX /METHOD=SSTYPE(3) /INTERCEPT=INCLUDE /EMMEANS=TABLES (GENOTYPE) /EMMEANS=TABLES (SEX) /PRINT ETASQ /CRITERIA=ALPHA(.05) /DESIGN=GENOTYPE SEX. </pre> |
| Resources              | Processor Time                 | 00:00:00.02                                                                                                                                                                                            |
|                        | Elapsed Time                   | 00:00:00.00                                                                                                                                                                                            |

### Between-Subjects Factors

|          |    | N  |
|----------|----|----|
| GENOTYPE | KI | 30 |
|          | WT | 26 |
| SEX      | F  | 27 |
|          | M  | 29 |

## Tests of Between-Subjects Effects

Dependent Variable: HindpawAvPrintArea

| Source          | Type III Sum of Squares | df | Mean Square | F        | Sig.  | Partial Eta Squared |
|-----------------|-------------------------|----|-------------|----------|-------|---------------------|
| Corrected Model | 11344.999 <sup>a</sup>  | 2  | 5672.499    | 2.140    | .128  | .075                |
| Intercept       | 2927695.87              | 1  | 2927695.87  | 1104.309 | <.001 | .954                |
| GENOTYPE        | 11317.208               | 1  | 11317.208   | 4.269    | .044  | .075                |
| SEX             | 35.044                  | 1  | 35.044      | .013     | .909  | .000                |
| Error           | 140511.347              | 53 | 2651.157    |          |       |                     |
| Total           | 3071417.03              | 56 |             |          |       |                     |
| Corrected Total | 151856.346              | 55 |             |          |       |                     |

a. R Squared = .075 (Adjusted R Squared = .040)

## Estimated Marginal Means

### 1. GENOTYPE

Dependent Variable: HindpawAvPrintArea

| GENOTYPE | Mean    | Std. Error | 95% Confidence Interval |             |
|----------|---------|------------|-------------------------|-------------|
|          |         |            | Lower Bound             | Upper Bound |
| KI       | 214.995 | 9.446      | 196.049                 | 233.941     |
| WT       | 243.658 | 10.112     | 223.376                 | 263.940     |

### 2. SEX

Dependent Variable: HindpawAvPrintArea

| SEX | Mean    | Std. Error | 95% Confidence Interval |             |
|-----|---------|------------|-------------------------|-------------|
|     |         |            | Lower Bound             | Upper Bound |
| F   | 228.530 | 9.912      | 208.648                 | 248.412     |
| M   | 230.122 | 9.636      | 210.795                 | 249.449     |

```
UNIANOVA FrTkWdmm BY GENOTYPE SEX
/METHOD=SSTYPE(3)
/INTERCEPT=INCLUDE
/EMMEANS=TABLES(GENOTYPE)
/EMMEANS=TABLES(SEX)
/PRINT ETASQ
/CRITERIA=ALPHA(.05)
/DESIGN=GENOTYPE SEX.
```

## Univariate Analysis of Variance

## Notes

|                        |                                |                                                                                                                                                                                                                  |
|------------------------|--------------------------------|------------------------------------------------------------------------------------------------------------------------------------------------------------------------------------------------------------------|
| Output Created         |                                | 22-AUG-2022 15:02:...                                                                                                                                                                                            |
| Comments               |                                |                                                                                                                                                                                                                  |
| Input                  | Data                           | /Users/jeffneul/Jeff's Research/Neul Manuscripts/FoxG1/June 2022 stat sex and effect size/SPSS files/SPSS Data Files/June 2022 Gait sex EF data.sav                                                              |
|                        | Active Dataset                 | DataSet4                                                                                                                                                                                                         |
|                        | Filter                         | <none>                                                                                                                                                                                                           |
|                        | Weight                         | <none>                                                                                                                                                                                                           |
|                        | Split File                     | <none>                                                                                                                                                                                                           |
|                        | N of Rows in Working Data File | 56                                                                                                                                                                                                               |
| Missing Value Handling | Definition of Missing          | User-defined missing values are treated as missing.                                                                                                                                                              |
|                        | Cases Used                     | Statistics are based on all cases with valid data for all variables in the model.                                                                                                                                |
| Syntax                 |                                | UNIANOVA FrTkWdmm<br>BY GENOTYPE SEX<br>/METHOD=SSTYPE(3)<br>/INTERCEPT=INCLUDE<br>/EMMEANS=TABLES<br>(GENOTYPE)<br>/EMMEANS=TABLES<br>(SEX)<br>/PRINT ETASQ<br>/CRITERIA=ALPHA(.05)<br>/DESIGN=GENOTYPE<br>SEX. |
| Resources              | Processor Time                 | 00:00:00.02                                                                                                                                                                                                      |
|                        | Elapsed Time                   | 00:00:00.00                                                                                                                                                                                                      |

### Between-Subjects Factors

|          |    | N  |
|----------|----|----|
| GENOTYPE | KI | 30 |
|          | WT | 26 |
| SEX      | F  | 27 |
|          | M  | 29 |

## Tests of Between-Subjects Effects

Dependent Variable: FrTkWd (mm)

| Source          | Type III Sum of Squares | df | Mean Square | F        | Sig.  | Partial Eta Squared |
|-----------------|-------------------------|----|-------------|----------|-------|---------------------|
| Corrected Model | 1.118 <sup>a</sup>      | 2  | .559        | .612     | .546  | .023                |
| Intercept       | 7887.363                | 1  | 7887.363    | 8642.236 | <.001 | .994                |
| GENOTYPE        | .038                    | 1  | .038        | .041     | .840  | .001                |
| SEX             | 1.111                   | 1  | 1.111       | 1.217    | .275  | .022                |
| Error           | 48.371                  | 53 | .913        |          |       |                     |
| Total           | 7987.913                | 56 |             |          |       |                     |
| Corrected Total | 49.488                  | 55 |             |          |       |                     |

a. R Squared = .023 (Adjusted R Squared = -.014)

## Estimated Marginal Means

### 1. GENOTYPE

Dependent Variable: FrTkWd (mm)

| GENOTYPE | Mean   | Std. Error | 95% Confidence Interval |             |
|----------|--------|------------|-------------------------|-------------|
|          |        |            | Lower Bound             | Upper Bound |
| KI       | 11.877 | .175       | 11.525                  | 12.228      |
| WT       | 11.929 | .188       | 11.553                  | 12.305      |

### 2. SEX

Dependent Variable: FrTkWd (mm)

| SEX | Mean   | Std. Error | 95% Confidence Interval |             |
|-----|--------|------------|-------------------------|-------------|
|     |        |            | Lower Bound             | Upper Bound |
| F   | 11.761 | .184       | 11.392                  | 12.130      |
| M   | 12.045 | .179       | 11.686                  | 12.403      |

```
UNIANOVA RrTkWdmm BY GENOTYPE SEX
/METHOD=SSTYPE(3)
/INTERCEPT=INCLUDE
/EMMEANS=TABLES(GENOTYPE)
/EMMEANS=TABLES(SEX)
/PRINT ETASQ
/CRITERIA=ALPHA(.05)
/DESIGN=GENOTYPE SEX.
```

## Univariate Analysis of Variance

## Notes

|                        |                                |                                                                                                                                                                                                                  |
|------------------------|--------------------------------|------------------------------------------------------------------------------------------------------------------------------------------------------------------------------------------------------------------|
| Output Created         |                                | 22-AUG-2022 15:02:...                                                                                                                                                                                            |
| Comments               |                                |                                                                                                                                                                                                                  |
| Input                  | Data                           | /Users/jeffneul/Jeff's Research/Neul Manuscripts/FoxG1/June 2022 stat sex and effect size/SPSS files/SPSS Data Files/June 2022 Gait sex EF data.sav                                                              |
|                        | Active Dataset                 | DataSet4                                                                                                                                                                                                         |
|                        | Filter                         | <none>                                                                                                                                                                                                           |
|                        | Weight                         | <none>                                                                                                                                                                                                           |
|                        | Split File                     | <none>                                                                                                                                                                                                           |
|                        | N of Rows in Working Data File | 56                                                                                                                                                                                                               |
| Missing Value Handling | Definition of Missing          | User-defined missing values are treated as missing.                                                                                                                                                              |
|                        | Cases Used                     | Statistics are based on all cases with valid data for all variables in the model.                                                                                                                                |
| Syntax                 |                                | UNIANOVA RrTkWdmm<br>BY GENOTYPE SEX<br>/METHOD=SSTYPE(3)<br>/INTERCEPT=INCLUDE<br>/EMMEANS=TABLES<br>(GENOTYPE)<br>/EMMEANS=TABLES<br>(SEX)<br>/PRINT ETASQ<br>/CRITERIA=ALPHA(.05)<br>/DESIGN=GENOTYPE<br>SEX. |
| Resources              | Processor Time                 | 00:00:00.01                                                                                                                                                                                                      |
|                        | Elapsed Time                   | 00:00:00.00                                                                                                                                                                                                      |

### Between-Subjects Factors

|          |    | N  |
|----------|----|----|
| GENOTYPE | KI | 30 |
|          | WT | 26 |
| SEX      | F  | 27 |
|          | M  | 29 |

### Tests of Between-Subjects Effects

Dependent Variable: RrTkWd (mm)

| Source          | Type III Sum of Squares | df | Mean Square | F         | Sig.  |
|-----------------|-------------------------|----|-------------|-----------|-------|
| Corrected Model | 13.225 <sup>a</sup>     | 2  | 6.613       | 3.933     | .026  |
| Intercept       | 23586.268               | 1  | 23586.268   | 14029.658 | <.001 |
| GENOTYPE        | 7.425                   | 1  | 7.425       | 4.417     | .040  |
| SEX             | 7.188                   | 1  | 7.188       | 4.275     | .044  |
| Error           | 89.102                  | 53 | 1.681       |           |       |
| Total           | 23797.790               | 56 |             |           |       |
| Corrected Total | 102.327                 | 55 |             |           |       |

### Tests of Between-Subjects Effects

Dependent Variable: RrTkWd (mm)

| Source          | Partial Eta Squared |
|-----------------|---------------------|
| Corrected Model | .129                |
| Intercept       | .996                |
| GENOTYPE        | .077                |
| SEX             | .075                |
| Error           |                     |
| Total           |                     |
| Corrected Total |                     |

a. R Squared = .129 (Adjusted R Squared = .096)

## Estimated Marginal Means

### 1. GENOTYPE

Dependent Variable: RrTkWd (mm)

| GENOTYPE | Mean   | Std. Error | 95% Confidence Interval |             |
|----------|--------|------------|-------------------------|-------------|
|          |        |            | Lower Bound             | Upper Bound |
| KI       | 20.216 | .238       | 19.739                  | 20.694      |
| WT       | 20.951 | .255       | 20.440                  | 21.461      |

## 2. SEX

Dependent Variable: RrTkWd (mm)

| SEX | Mean   | Std. Error | 95% Confidence Interval |             |
|-----|--------|------------|-------------------------|-------------|
|     |        |            | Lower Bound             | Upper Bound |
| F   | 20.223 | .250       | 19.722                  | 20.724      |
| M   | 20.944 | .243       | 20.457                  | 21.431      |

```
UNIANOVA OverallAvgRunSpeedmmsBY GENOTYPE SEX
/METHOD=SSTYPE(3)
/INTERCEPT=INCLUDE
/EMMEANS=TABLES(GENOTYPE)
/EMMEANS=TABLES(SEX)
/PRINT ETASQ
/CRITERIA=ALPHA(.05)
/DESIGN=GENOTYPE SEX.
```

## Univariate Analysis of Variance

### Notes

|                        |                                |                                                                                                                                                     |
|------------------------|--------------------------------|-----------------------------------------------------------------------------------------------------------------------------------------------------|
| Output Created         |                                | 22-AUG-2022 15:02:...                                                                                                                               |
| Comments               |                                |                                                                                                                                                     |
| Input                  | Data                           | /Users/jeffneul/Jeff's Research/Neul Manuscripts/FoxG1/June 2022 stat sex and effect size/SPSS files/SPSS Data Files/June 2022 Gait sex EF data.sav |
|                        | Active Dataset                 | DataSet4                                                                                                                                            |
|                        | Filter                         | <none>                                                                                                                                              |
|                        | Weight                         | <none>                                                                                                                                              |
|                        | Split File                     | <none>                                                                                                                                              |
|                        | N of Rows in Working Data File | 56                                                                                                                                                  |
| Missing Value Handling | Definition of Missing          | User-defined missing values are treated as missing.                                                                                                 |
|                        | Cases Used                     | Statistics are based on all cases with valid data for all variables in the model.                                                                   |



## Notes

|           |                                                                                                                                                                                                                                   |             |
|-----------|-----------------------------------------------------------------------------------------------------------------------------------------------------------------------------------------------------------------------------------|-------------|
| Syntax    | UNIANOVA<br>OverallAvgRunSpeedmm<br>s BY GENOTYPE SEX<br>/METHOD=SSTYPE(3)<br>/INTERCEPT=INCLUDE<br>/EMMEANS=TABLES<br>(GENOTYPE)<br>/EMMEANS=TABLES<br>(SEX)<br>/PRINT ETASQ<br>/CRITERIA=ALPHA(.05)<br>/DESIGN=GENOTYPE<br>SEX. |             |
| Resources | Processor Time                                                                                                                                                                                                                    | 00:00:00.02 |
|           | Elapsed Time                                                                                                                                                                                                                      | 00:00:00.00 |

## Between-Subjects Factors

|          |    | N  |
|----------|----|----|
| GENOTYPE | KI | 30 |
|          | WT | 26 |
| SEX      | F  | 27 |
|          | M  | 29 |

## Tests of Between-Subjects Effects

Dependent Variable: Overall Avg Run Speed (mm/s):

| Source          | Type III Sum of Squares | df | Mean Square | F        | Sig.  | Partial Eta Squared |
|-----------------|-------------------------|----|-------------|----------|-------|---------------------|
| Corrected Model | 514.919 <sup>a</sup>    | 2  | 257.460     | .716     | .494  | .026                |
| Intercept       | 1835009.15              | 1  | 1835009.15  | 5101.037 | <.001 | .990                |
| GENOTYPE        | 440.090                 | 1  | 440.090     | 1.223    | .274  | .023                |
| SEX             | 116.723                 | 1  | 116.723     | .324     | .571  | .006                |
| Error           | 19065.828               | 53 | 359.733     |          |       |                     |
| Total           | 1868529.23              | 56 |             |          |       |                     |
| Corrected Total | 19580.747               | 55 |             |          |       |                     |

a. R Squared = .026 (Adjusted R Squared = -.010)

## Estimated Marginal Means

## 1. GENOTYPE

Dependent Variable: Overall Avg Run Speed (mm/s):

| GENOTYPE | Mean    | Std. Error | 95% Confidence Interval |             |
|----------|---------|------------|-------------------------|-------------|
|          |         |            | Lower Bound             | Upper Bound |
| KI       | 184.382 | 3.479      | 177.403                 | 191.361     |
| WT       | 178.730 | 3.725      | 171.258                 | 186.201     |

## 2. SEX

Dependent Variable: Overall Avg Run Speed (mm/s):

| SEX | Mean    | Std. Error | 95% Confidence Interval |             |
|-----|---------|------------|-------------------------|-------------|
|     |         |            | Lower Bound             | Upper Bound |
| F   | 183.008 | 3.651      | 175.685                 | 190.332     |
| M   | 180.103 | 3.549      | 172.984                 | 187.222     |

```
UNIANOVA ForepawHomolatCplBY GENOTYPE SEX
/METHOD=SSTYPE(3)
/INTERCEPT=INCLUDE
/EMMEANS=TABLES(GENOTYPE)
/EMMEANS=TABLES(SEX)
/PRINT ETASQ
/CRITERIA=ALPHA(.05)
/DESIGN=GENOTYPE SEX.
```

## Univariate Analysis of Variance

## Notes

|                        |                                |                                                                                                                                                                                                       |
|------------------------|--------------------------------|-------------------------------------------------------------------------------------------------------------------------------------------------------------------------------------------------------|
| Output Created         |                                | 22-AUG-2022 15:03:...                                                                                                                                                                                 |
| Comments               |                                |                                                                                                                                                                                                       |
| Input                  | Data                           | /Users/jeffneul/Jeff's Research/Neul Manuscripts/FoxG1/June 2022 stat sex and effect size/SPSS files/SPSS Data Files/June 2022 Gait sex EF data.sav                                                   |
|                        | Active Dataset                 | DataSet4                                                                                                                                                                                              |
|                        | Filter                         | <none>                                                                                                                                                                                                |
|                        | Weight                         | <none>                                                                                                                                                                                                |
|                        | Split File                     | <none>                                                                                                                                                                                                |
|                        | N of Rows in Working Data File | 56                                                                                                                                                                                                    |
| Missing Value Handling | Definition of Missing          | User-defined missing values are treated as missing.                                                                                                                                                   |
|                        | Cases Used                     | Statistics are based on all cases with valid data for all variables in the model.                                                                                                                     |
| Syntax                 |                                | <pre> UNIANOVA ForepawHomolatCpl BY GENOTYPE SEX /METHOD=SSTYPE(3) /INTERCEPT=INCLUDE /EMMEANS=TABLES (GENOTYPE) /EMMEANS=TABLES (SEX) /PRINT ETASQ /CRITERIA=ALPHA(.05) /DESIGN=GENOTYPE SEX. </pre> |
| Resources              | Processor Time                 | 00:00:00.01                                                                                                                                                                                           |
|                        | Elapsed Time                   | 00:00:00.00                                                                                                                                                                                           |

### Between-Subjects Factors

|          |    | N  |
|----------|----|----|
| GENOTYPE | KI | 30 |
|          | WT | 26 |
| SEX      | F  | 27 |
|          | M  | 29 |

### Tests of Between-Subjects Effects

Dependent Variable: ForepawHomolatCpl

| Source          | Type III Sum of Squares | df | Mean Square | F         | Sig.  |
|-----------------|-------------------------|----|-------------|-----------|-------|
| Corrected Model | .005 <sup>a</sup>       | 2  | .003        | 2.314     | .109  |
| Intercept       | 15.919                  | 1  | 15.919      | 13698.520 | <.001 |
| GENOTYPE        | .004                    | 1  | .004        | 3.611     | .063  |
| SEX             | .002                    | 1  | .002        | 1.446     | .235  |
| Error           | .062                    | 53 | .001        |           |       |
| Total           | 16.106                  | 56 |             |           |       |
| Corrected Total | .067                    | 55 |             |           |       |

### Tests of Between-Subjects Effects

Dependent Variable: ForepawHomolatCpl

| Source          | Partial Eta Squared |
|-----------------|---------------------|
| Corrected Model | .080                |
| Intercept       | .996                |
| GENOTYPE        | .064                |
| SEX             | .027                |
| Error           |                     |
| Total           |                     |
| Corrected Total |                     |

a. R Squared = .080 (Adjusted R Squared = .046)

## Estimated Marginal Means

### 1. GENOTYPE

Dependent Variable: ForepawHomolatCpl

| GENOTYPE | Mean | Std. Error | 95% Confidence Interval |             |
|----------|------|------------|-------------------------|-------------|
|          |      |            | Lower Bound             | Upper Bound |
| KI       | .543 | .006       | .531                    | .556        |
| WT       | .526 | .007       | .513                    | .539        |

## 2. SEX

Dependent Variable: ForepawHomolatCpl

| SEX | Mean | Std. Error | 95% Confidence Interval |             |
|-----|------|------------|-------------------------|-------------|
|     |      |            | Lower Bound             | Upper Bound |
| F   | .540 | .007       | .527                    | .553        |
| M   | .529 | .006       | .516                    | .542        |

```

UNIANOVA ForepawHomologCpl BY GENOTYPE SEX
/METHOD=SSTYPE(3)
/INTERCEPT=INCLUDE
/EMMEANS=TABLES(GENOTYPE)
/EMMEANS=TABLES(SEX)
/PRINT ETASQ
/CRITERIA=ALPHA(.05)
/DESIGN=GENOTYPE SEX.
  
```

## Univariate Analysis of Variance

### Notes

|                        |                                |                                                                                                                                                     |
|------------------------|--------------------------------|-----------------------------------------------------------------------------------------------------------------------------------------------------|
| Output Created         |                                | 22-AUG-2022 15:03:...                                                                                                                               |
| Comments               |                                |                                                                                                                                                     |
| Input                  | Data                           | /Users/jeffneul/Jeff's Research/Neul Manuscripts/FoxG1/June 2022 stat sex and effect size/SPSS files/SPSS Data Files/June 2022 Gait sex EF data.sav |
|                        | Active Dataset                 | DataSet4                                                                                                                                            |
|                        | Filter                         | <none>                                                                                                                                              |
|                        | Weight                         | <none>                                                                                                                                              |
|                        | Split File                     | <none>                                                                                                                                              |
|                        | N of Rows in Working Data File | 56                                                                                                                                                  |
| Missing Value Handling | Definition of Missing          | User-defined missing values are treated as missing.                                                                                                 |
|                        | Cases Used                     | Statistics are based on all cases with valid data for all variables in the model.                                                                   |

## Notes

|           |                |                                                                                                                                                                                                                              |
|-----------|----------------|------------------------------------------------------------------------------------------------------------------------------------------------------------------------------------------------------------------------------|
| Syntax    |                | UNIANOVA<br>ForepawHomologCpl BY<br>GENOTYPE SEX<br>/METHOD=SSTYPE(3)<br>/INTERCEPT=INCLUDE<br>/EMMEANS=TABLES<br>(GENOTYPE)<br>/EMMEANS=TABLES<br>(SEX)<br>/PRINT ETASQ<br>/CRITERIA=ALPHA(.05)<br>/DESIGN=GENOTYPE<br>SEX. |
| Resources | Processor Time | 00:00:00.02                                                                                                                                                                                                                  |
|           | Elapsed Time   | 00:00:00.00                                                                                                                                                                                                                  |

### Between-Subjects Factors

|          |    | N  |
|----------|----|----|
| GENOTYPE | KI | 30 |
|          | WT | 26 |
| SEX      | F  | 27 |
|          | M  | 29 |

### Tests of Between-Subjects Effects

Dependent Variable: ForepawHomologCpl

| Source          | Type III Sum of Squares | df | Mean Square | F          | Sig.  |
|-----------------|-------------------------|----|-------------|------------|-------|
| Corrected Model | .000 <sup>a</sup>       | 2  | .000        | 1.584      | .215  |
| Intercept       | 13.643                  | 1  | 13.643      | 179468.999 | <.001 |
| GENOTYPE        | 3.705E-5                | 1  | 3.705E-5    | .487       | .488  |
| SEX             | .000                    | 1  | .000        | 2.418      | .126  |
| Error           | .004                    | 53 | 7.602E-5    |            |       |
| Total           | 13.721                  | 56 |             |            |       |
| Corrected Total | .004                    | 55 |             |            |       |

## Tests of Between-Subjects Effects

Dependent Variable: ForepawHomologCpl

| Source          | Partial Eta Squared |
|-----------------|---------------------|
| Corrected Model | .056                |
| Intercept       | 1.000               |
| GENOTYPE        | .009                |
| SEX             | .044                |
| Error           |                     |
| Total           |                     |
| Corrected Total |                     |

a. R Squared = .056 (Adjusted R Squared = .021)

## Estimated Marginal Means

### 1. GENOTYPE

Dependent Variable: ForepawHomologCpl

| GENOTYPE | Mean | Std. Error | 95% Confidence Interval |             |
|----------|------|------------|-------------------------|-------------|
|          |      |            | Lower Bound             | Upper Bound |
| KI       | .494 | .002       | .491                    | .497        |
| WT       | .496 | .002       | .492                    | .499        |

### 2. SEX

Dependent Variable: ForepawHomologCpl

| SEX | Mean | Std. Error | 95% Confidence Interval |             |
|-----|------|------------|-------------------------|-------------|
|     |      |            | Lower Bound             | Upper Bound |
| F   | .497 | .002       | .493                    | .500        |
| M   | .493 | .002       | .490                    | .496        |

```
UNIANOVA ForepawDiagonalCplBY GENOTYPE SEX
/METHOD=SSTYPE(3)
/INTERCEPT=INCLUDE
/EMMEANS=TABLES(GENOTYPE)
/EMMEANS=TABLES(SEX)
/PRINT ETASQ
/CRITERIA=ALPHA(.05)
/DESIGN=GENOTYPE SEX.
```

## Univariate Analysis of Variance

## Notes

|                        |                                |                                                                                                                                                                                                        |
|------------------------|--------------------------------|--------------------------------------------------------------------------------------------------------------------------------------------------------------------------------------------------------|
| Output Created         |                                | 22-AUG-2022 15:03:...                                                                                                                                                                                  |
| Comments               |                                |                                                                                                                                                                                                        |
| Input                  | Data                           | /Users/jeffneul/Jeff's Research/Neul Manuscripts/FoxG1/June 2022 stat sex and effect size/SPSS files/SPSS Data Files/June 2022 Gait sex EF data.sav                                                    |
|                        | Active Dataset                 | DataSet4                                                                                                                                                                                               |
|                        | Filter                         | <none>                                                                                                                                                                                                 |
|                        | Weight                         | <none>                                                                                                                                                                                                 |
|                        | Split File                     | <none>                                                                                                                                                                                                 |
|                        | N of Rows in Working Data File | 56                                                                                                                                                                                                     |
| Missing Value Handling | Definition of Missing          | User-defined missing values are treated as missing.                                                                                                                                                    |
|                        | Cases Used                     | Statistics are based on all cases with valid data for all variables in the model.                                                                                                                      |
| Syntax                 |                                | <pre> UNIANOVA ForepawDiagonalCpl BY GENOTYPE SEX /METHOD=SSTYPE(3) /INTERCEPT=INCLUDE /EMMEANS=TABLES (GENOTYPE) /EMMEANS=TABLES (SEX) /PRINT ETASQ /CRITERIA=ALPHA(.05) /DESIGN=GENOTYPE SEX. </pre> |
| Resources              | Processor Time                 | 00:00:00.02                                                                                                                                                                                            |
|                        | Elapsed Time                   | 00:00:00.00                                                                                                                                                                                            |

### Between-Subjects Factors

|          |    | N  |
|----------|----|----|
| GENOTYPE | KI | 30 |
|          | WT | 26 |
| SEX      | F  | 27 |
|          | M  | 29 |



## Tests of Between-Subjects Effects

Dependent Variable: ForepawDiagonalCpl

| Source          | Type III Sum of Squares | df | Mean Square | F       | Sig.  | Partial Eta Squared |
|-----------------|-------------------------|----|-------------|---------|-------|---------------------|
| Corrected Model | .002 <sup>a</sup>       | 2  | .001        | 1.005   | .373  | .037                |
| Intercept       | .237                    | 1  | .237        | 230.029 | <.001 | .813                |
| GENOTYPE        | .002                    | 1  | .002        | 1.601   | .211  | .029                |
| SEX             | .001                    | 1  | .001        | .590    | .446  | .011                |
| Error           | .055                    | 53 | .001        |         |       |                     |
| Total           | .297                    | 56 |             |         |       |                     |
| Corrected Total | .057                    | 55 |             |         |       |                     |

a. R Squared = .037 (Adjusted R Squared = .000)

## Estimated Marginal Means

### 1. GENOTYPE

Dependent Variable: ForepawDiagonalCpl

| GENOTYPE | Mean | Std. Error | 95% Confidence Interval |             |
|----------|------|------------|-------------------------|-------------|
|          |      |            | Lower Bound             | Upper Bound |
| KI       | .071 | .006       | .059                    | .083        |
| WT       | .060 | .006       | .047                    | .072        |

### 2. SEX

Dependent Variable: ForepawDiagonalCpl

| SEX | Mean | Std. Error | 95% Confidence Interval |             |
|-----|------|------------|-------------------------|-------------|
|     |      |            | Lower Bound             | Upper Bound |
| F   | .069 | .006       | .056                    | .081        |
| M   | .062 | .006       | .050                    | .074        |

```

UNIANOVA HindpawHomolatCpl BY GENOTYPE SEX
/METHOD=SSTYPE(3)
/INTERCEPT=INCLUDE
/EMMEANS=TABLES(GENOTYPE)
/EMMEANS=TABLES(SEX)
/PRINT ETASQ
/CRITERIA=ALPHA(.05)
/DESIGN=GENOTYPE SEX.
    
```

## Univariate Analysis of Variance

## Notes

|                        |                                |                                                                                                                                                                                                       |
|------------------------|--------------------------------|-------------------------------------------------------------------------------------------------------------------------------------------------------------------------------------------------------|
| Output Created         |                                | 22-AUG-2022 15:03:...                                                                                                                                                                                 |
| Comments               |                                |                                                                                                                                                                                                       |
| Input                  | Data                           | /Users/jeffneul/Jeff's Research/Neul Manuscripts/FoxG1/June 2022 stat sex and effect size/SPSS files/SPSS Data Files/June 2022 Gait sex EF data.sav                                                   |
|                        | Active Dataset                 | DataSet4                                                                                                                                                                                              |
|                        | Filter                         | <none>                                                                                                                                                                                                |
|                        | Weight                         | <none>                                                                                                                                                                                                |
|                        | Split File                     | <none>                                                                                                                                                                                                |
|                        | N of Rows in Working Data File | 56                                                                                                                                                                                                    |
| Missing Value Handling | Definition of Missing          | User-defined missing values are treated as missing.                                                                                                                                                   |
|                        | Cases Used                     | Statistics are based on all cases with valid data for all variables in the model.                                                                                                                     |
| Syntax                 |                                | <pre> UNIANOVA HindpawHomolatCpl BY GENOTYPE SEX /METHOD=SSTYPE(3) /INTERCEPT=INCLUDE /EMMEANS=TABLES (GENOTYPE) /EMMEANS=TABLES (SEX) /PRINT ETASQ /CRITERIA=ALPHA(.05) /DESIGN=GENOTYPE SEX. </pre> |
| Resources              | Processor Time                 | 00:00:00.01                                                                                                                                                                                           |
|                        | Elapsed Time                   | 00:00:00.00                                                                                                                                                                                           |

### Between-Subjects Factors

|          |    | N  |
|----------|----|----|
| GENOTYPE | KI | 30 |
|          | WT | 26 |
| SEX      | F  | 27 |
|          | M  | 29 |

## Tests of Between-Subjects Effects

Dependent Variable: HindpawHomolatCpl

| Source          | Type III Sum of Squares | df | Mean Square | F        | Sig.  | Partial Eta Squared |
|-----------------|-------------------------|----|-------------|----------|-------|---------------------|
| Corrected Model | .009 <sup>a</sup>       | 2  | .005        | 3.493    | .038  | .116                |
| Intercept       | 11.076                  | 1  | 11.076      | 8192.246 | <.001 | .994                |
| GENOTYPE        | .009                    | 1  | .009        | 6.952    | .011  | .116                |
| SEX             | .000                    | 1  | .000        | .211     | .648  | .004                |
| Error           | .072                    | 53 | .001        |          |       |                     |
| Total           | 11.181                  | 56 |             |          |       |                     |
| Corrected Total | .081                    | 55 |             |          |       |                     |

a. R Squared = .116 (Adjusted R Squared = .083)

## Estimated Marginal Means

### 1. GENOTYPE

Dependent Variable: HindpawHomolatCpl

| GENOTYPE | Mean | Std. Error | 95% Confidence Interval |             |
|----------|------|------------|-------------------------|-------------|
|          |      |            | Lower Bound             | Upper Bound |
| KI       | .433 | .007       | .419                    | .447        |
| WT       | .459 | .007       | .445                    | .474        |

### 2. SEX

Dependent Variable: HindpawHomolatCpl

| SEX | Mean | Std. Error | 95% Confidence Interval |             |
|-----|------|------------|-------------------------|-------------|
|     |      |            | Lower Bound             | Upper Bound |
| F   | .444 | .007       | .430                    | .458        |
| M   | .448 | .007       | .435                    | .462        |

```
UNIANOVA HindpawHomologCpl BY GENOTYPE SEX
/METHOD=SSTYPE(3)
/INTERCEPT=INCLUDE
/EMMEANS=TABLES(GENOTYPE)
/EMMEANS=TABLES(SEX)
/PRINT ETASQ
/CRITERIA=ALPHA(.05)
/DESIGN=GENOTYPE SEX.
```

## Univariate Analysis of Variance

## Notes

|                        |                                |                                                                                                                                                                                                       |
|------------------------|--------------------------------|-------------------------------------------------------------------------------------------------------------------------------------------------------------------------------------------------------|
| Output Created         |                                | 22-AUG-2022 15:04:...                                                                                                                                                                                 |
| Comments               |                                |                                                                                                                                                                                                       |
| Input                  | Data                           | /Users/jeffneul/Jeff's Research/Neul Manuscripts/FoxG1/June 2022 stat sex and effect size/SPSS files/SPSS Data Files/June 2022 Gait sex EF data.sav                                                   |
|                        | Active Dataset                 | DataSet4                                                                                                                                                                                              |
|                        | Filter                         | <none>                                                                                                                                                                                                |
|                        | Weight                         | <none>                                                                                                                                                                                                |
|                        | Split File                     | <none>                                                                                                                                                                                                |
|                        | N of Rows in Working Data File | 56                                                                                                                                                                                                    |
| Missing Value Handling | Definition of Missing          | User-defined missing values are treated as missing.                                                                                                                                                   |
|                        | Cases Used                     | Statistics are based on all cases with valid data for all variables in the model.                                                                                                                     |
| Syntax                 |                                | <pre> UNIANOVA HindpawHomologCpl BY GENOTYPE SEX /METHOD=SSTYPE(3) /INTERCEPT=INCLUDE /EMMEANS=TABLES (GENOTYPE) /EMMEANS=TABLES (SEX) /PRINT ETASQ /CRITERIA=ALPHA(.05) /DESIGN=GENOTYPE SEX. </pre> |
| Resources              | Processor Time                 | 00:00:00.02                                                                                                                                                                                           |
|                        | Elapsed Time                   | 00:00:00.00                                                                                                                                                                                           |

### Between-Subjects Factors

|          |    | N  |
|----------|----|----|
| GENOTYPE | KI | 30 |
|          | WT | 26 |
| SEX      | F  | 27 |
|          | M  | 29 |

### Tests of Between-Subjects Effects

Dependent Variable: HindpawHomologCpl

| Source          | Type III Sum of Squares | df | Mean Square | F         | Sig.  |
|-----------------|-------------------------|----|-------------|-----------|-------|
| Corrected Model | .001 <sup>a</sup>       | 2  | .001        | 2.732     | .074  |
| Intercept       | 13.174                  | 1  | 13.174      | 50407.863 | <.001 |
| GENOTYPE        | .001                    | 1  | .001        | 5.392     | .024  |
| SEX             | 6.741E-5                | 1  | 6.741E-5    | .258      | .614  |
| Error           | .014                    | 53 | .000        |           |       |
| Total           | 13.250                  | 56 |             |           |       |
| Corrected Total | .015                    | 55 |             |           |       |

### Tests of Between-Subjects Effects

Dependent Variable: HindpawHomologCpl

| Source          | Partial Eta Squared |
|-----------------|---------------------|
| Corrected Model | .093                |
| Intercept       | .999                |
| GENOTYPE        | .092                |
| SEX             | .005                |
| Error           |                     |
| Total           |                     |
| Corrected Total |                     |

a. R Squared = .093 (Adjusted R Squared = .059)

## Estimated Marginal Means

### 1. GENOTYPE

Dependent Variable: HindpawHomologCpl

| GENOTYPE | Mean | Std. Error | 95% Confidence Interval |             |
|----------|------|------------|-------------------------|-------------|
|          |      |            | Lower Bound             | Upper Bound |
| KI       | .481 | .003       | .475                    | .487        |
| WT       | .492 | .003       | .485                    | .498        |

## 2. SEX

Dependent Variable: HindpawHomologCpl

| SEX | Mean | Std. Error | 95% Confidence Interval |             |
|-----|------|------------|-------------------------|-------------|
|     |      |            | Lower Bound             | Upper Bound |
| F   | .485 | .003       | .479                    | .492        |
| M   | .488 | .003       | .481                    | .494        |

```

UNIANOVA HindpawDiagonalCplBY GENOTYPE SEX
/METHOD=SSTYPE(3)
/INTERCEPT=INCLUDE
/EMMEANS=TABLES(GENOTYPE)
/EMMEANS=TABLES(SEX)
/PRINT ETASQ
/CRITERIA=ALPHA(.05)
/DESIGN=GENOTYPE SEX.

```

## Univariate Analysis of Variance

### Notes

|                        |                                |                                                                                                                                                     |
|------------------------|--------------------------------|-----------------------------------------------------------------------------------------------------------------------------------------------------|
| Output Created         |                                | 22-AUG-2022 15:04:...                                                                                                                               |
| Comments               |                                |                                                                                                                                                     |
| Input                  | Data                           | /Users/jeffneul/Jeff's Research/Neul Manuscripts/FoxG1/June 2022 stat sex and effect size/SPSS files/SPSS Data Files/June 2022 Gait sex EF data.sav |
|                        | Active Dataset                 | DataSet4                                                                                                                                            |
|                        | Filter                         | <none>                                                                                                                                              |
|                        | Weight                         | <none>                                                                                                                                              |
|                        | Split File                     | <none>                                                                                                                                              |
|                        | N of Rows in Working Data File | 56                                                                                                                                                  |
| Missing Value Handling | Definition of Missing          | User-defined missing values are treated as missing.                                                                                                 |
|                        | Cases Used                     | Statistics are based on all cases with valid data for all variables in the model.                                                                   |

## Notes

|           |                |                                                                                                                                                                                                                               |
|-----------|----------------|-------------------------------------------------------------------------------------------------------------------------------------------------------------------------------------------------------------------------------|
| Syntax    |                | UNIANOVA<br>HindpawDiagonalCpl BY<br>GENOTYPE SEX<br>/METHOD=SSTYPE(3)<br>/INTERCEPT=INCLUDE<br>/EMMEANS=TABLES<br>(GENOTYPE)<br>/EMMEANS=TABLES<br>(SEX)<br>/PRINT ETASQ<br>/CRITERIA=ALPHA(.05)<br>/DESIGN=GENOTYPE<br>SEX. |
| Resources | Processor Time | 00:00:00.02                                                                                                                                                                                                                   |
|           | Elapsed Time   | 00:00:00.00                                                                                                                                                                                                                   |

### Between-Subjects Factors

|          |    | N  |
|----------|----|----|
| GENOTYPE | KI | 30 |
|          | WT | 26 |
| SEX      | F  | 27 |
|          | M  | 29 |

### Tests of Between-Subjects Effects

Dependent Variable: HindpawDiagonalCpl

| Source          | Type III Sum of Squares | df | Mean Square | F      | Sig.  | Partial Eta Squared |
|-----------------|-------------------------|----|-------------|--------|-------|---------------------|
| Corrected Model | .001 <sup>a</sup>       | 2  | .000        | .345   | .710  | .013                |
| Intercept       | .033                    | 1  | .033        | 24.039 | <.001 | .312                |
| GENOTYPE        | .001                    | 1  | .001        | .547   | .463  | .010                |
| SEX             | .000                    | 1  | .000        | .088   | .768  | .002                |
| Error           | .073                    | 53 | .001        |        |       |                     |
| Total           | .108                    | 56 |             |        |       |                     |
| Corrected Total | .074                    | 55 |             |        |       |                     |

a. R Squared = .013 (Adjusted R Squared = -.024)

### Estimated Marginal Means

## 1. GENOTYPE

Dependent Variable: HindpawDiagonalCpl

| GENOTYPE | Mean  | Std. Error | 95% Confidence Interval |             |
|----------|-------|------------|-------------------------|-------------|
|          |       |            | Lower Bound             | Upper Bound |
| KI       | -.028 | .007       | -.042                   | -.014       |
| WT       | -.021 | .007       | -.035                   | -.006       |

## 2. SEX

Dependent Variable: HindpawDiagonalCpl

| SEX | Mean  | Std. Error | 95% Confidence Interval |             |
|-----|-------|------------|-------------------------|-------------|
|     |       |            | Lower Bound             | Upper Bound |
| F   | -.023 | .007       | -.037                   | -.009       |
| M   | -.026 | .007       | -.040                   | -.012       |

```
UNIANOVA ForepawGaitAngleBY GENOTYPE SEX
/METHOD=SSTYPE(3)
/INTERCEPT=INCLUDE
/EMMEANS=TABLES(GENOTYPE)
/EMMEANS=TABLES(SEX)
/PRINT ETASQ
/CRITERIA=ALPHA(.05)
/DESIGN=GENOTYPE SEX.
```

## Univariate Analysis of Variance



## Notes

|                        |                                |                                                                                                                                                                                                      |
|------------------------|--------------------------------|------------------------------------------------------------------------------------------------------------------------------------------------------------------------------------------------------|
| Output Created         |                                | 22-AUG-2022 15:04:...                                                                                                                                                                                |
| Comments               |                                |                                                                                                                                                                                                      |
| Input                  | Data                           | /Users/jeffneul/Jeff's Research/Neul Manuscripts/FoxG1/June 2022 stat sex and effect size/SPSS files/SPSS Data Files/June 2022 Gait sex EF data.sav                                                  |
|                        | Active Dataset                 | DataSet4                                                                                                                                                                                             |
|                        | Filter                         | <none>                                                                                                                                                                                               |
|                        | Weight                         | <none>                                                                                                                                                                                               |
|                        | Split File                     | <none>                                                                                                                                                                                               |
|                        | N of Rows in Working Data File | 56                                                                                                                                                                                                   |
| Missing Value Handling | Definition of Missing          | User-defined missing values are treated as missing.                                                                                                                                                  |
|                        | Cases Used                     | Statistics are based on all cases with valid data for all variables in the model.                                                                                                                    |
| Syntax                 |                                | <pre> UNIANOVA ForepawGaitAngle BY GENOTYPE SEX /METHOD=SSTYPE(3) /INTERCEPT=INCLUDE /EMMEANS=TABLES (GENOTYPE) /EMMEANS=TABLES (SEX) /PRINT ETASQ /CRITERIA=ALPHA(.05) /DESIGN=GENOTYPE SEX. </pre> |
| Resources              | Processor Time                 | 00:00:00.02                                                                                                                                                                                          |
|                        | Elapsed Time                   | 00:00:00.00                                                                                                                                                                                          |

### Between-Subjects Factors

|          |    | N  |
|----------|----|----|
| GENOTYPE | KI | 30 |
|          | WT | 26 |
| SEX      | F  | 27 |
|          | M  | 29 |

## Tests of Between-Subjects Effects

Dependent Variable: ForepawGaitAngle

| Source          | Type III Sum of Squares | df | Mean Square | F        | Sig.  | Partial Eta Squared |
|-----------------|-------------------------|----|-------------|----------|-------|---------------------|
| Corrected Model | 19.569 <sup>a</sup>     | 2  | 9.784       | .289     | .750  | .011                |
| Intercept       | 153088.999              | 1  | 153088.999  | 4515.899 | <.001 | .988                |
| GENOTYPE        | 6.841                   | 1  | 6.841       | .202     | .655  | .004                |
| SEX             | 14.611                  | 1  | 14.611      | .431     | .514  | .008                |
| Error           | 1796.700                | 53 | 33.900      |          |       |                     |
| Total           | 155853.653              | 56 |             |          |       |                     |
| Corrected Total | 1816.269                | 55 |             |          |       |                     |

a. R Squared = .011 (Adjusted R Squared = -.027)

## Estimated Marginal Means

### 1. GENOTYPE

Dependent Variable: ForepawGaitAngle

| GENOTYPE | Mean   | Std. Error | 95% Confidence Interval |             |
|----------|--------|------------|-------------------------|-------------|
|          |        |            | Lower Bound             | Upper Bound |
| KI       | 52.792 | 1.068      | 50.650                  | 54.935      |
| WT       | 52.088 | 1.143      | 49.794                  | 54.381      |

### 2. SEX

Dependent Variable: ForepawGaitAngle

| SEX | Mean   | Std. Error | 95% Confidence Interval |             |
|-----|--------|------------|-------------------------|-------------|
|     |        |            | Lower Bound             | Upper Bound |
| F   | 52.954 | 1.121      | 50.706                  | 55.202      |
| M   | 51.926 | 1.090      | 49.741                  | 54.112      |

```

UNIANOVA HindpawGaitAngleBY GENOTYPE SEX
/METHOD=SSTYPE(3)
/INTERCEPT=INCLUDE
/EMMEANS=TABLES(GENOTYPE)
/EMMEANS=TABLES(SEX)
/PRINT ETASQ
/CRITERIA=ALPHA(.05)
/DESIGN=GENOTYPE SEX.

```

## Univariate Analysis of Variance

## Notes

|                        |                                |                                                                                                                                                                                                      |
|------------------------|--------------------------------|------------------------------------------------------------------------------------------------------------------------------------------------------------------------------------------------------|
| Output Created         |                                | 22-AUG-2022 15:04:...                                                                                                                                                                                |
| Comments               |                                |                                                                                                                                                                                                      |
| Input                  | Data                           | /Users/jeffneul/Jeff's Research/Neul Manuscripts/FoxG1/June 2022 stat sex and effect size/SPSS files/SPSS Data Files/June 2022 Gait sex EF data.sav                                                  |
|                        | Active Dataset                 | DataSet4                                                                                                                                                                                             |
|                        | Filter                         | <none>                                                                                                                                                                                               |
|                        | Weight                         | <none>                                                                                                                                                                                               |
|                        | Split File                     | <none>                                                                                                                                                                                               |
|                        | N of Rows in Working Data File | 56                                                                                                                                                                                                   |
| Missing Value Handling | Definition of Missing          | User-defined missing values are treated as missing.                                                                                                                                                  |
|                        | Cases Used                     | Statistics are based on all cases with valid data for all variables in the model.                                                                                                                    |
| Syntax                 |                                | <pre> UNIANOVA HindpawGaitAngle BY GENOTYPE SEX /METHOD=SSTYPE(3) /INTERCEPT=INCLUDE /EMMEANS=TABLES (GENOTYPE) /EMMEANS=TABLES (SEX) /PRINT ETASQ /CRITERIA=ALPHA(.05) /DESIGN=GENOTYPE SEX. </pre> |
| Resources              | Processor Time                 | 00:00:00.02                                                                                                                                                                                          |
|                        | Elapsed Time                   | 00:00:00.00                                                                                                                                                                                          |

### Between-Subjects Factors

|          |    | N  |
|----------|----|----|
| GENOTYPE | KI | 30 |
|          | WT | 26 |
| SEX      | F  | 27 |
|          | M  | 29 |

## Tests of Between-Subjects Effects

Dependent Variable: HindpawGaitAngle

| Source          | Type III Sum of Squares | df | Mean Square | F        | Sig.  | Partial Eta Squared |
|-----------------|-------------------------|----|-------------|----------|-------|---------------------|
| Corrected Model | 24.366 <sup>a</sup>     | 2  | 12.183      | .290     | .749  | .011                |
| Intercept       | 228313.165              | 1  | 228313.165  | 5437.864 | <.001 | .990                |
| GENOTYPE        | 16.382                  | 1  | 16.382      | .390     | .535  | .007                |
| SEX             | 10.464                  | 1  | 10.464      | .249     | .620  | .005                |
| Error           | 2225.248                | 53 | 41.986      |          |       |                     |
| Total           | 231749.603              | 56 |             |          |       |                     |
| Corrected Total | 2249.615                | 55 |             |          |       |                     |

a. R Squared = .011 (Adjusted R Squared = -.026)

## Estimated Marginal Means

### 1. GENOTYPE

Dependent Variable: HindpawGaitAngle

| GENOTYPE | Mean   | Std. Error | 95% Confidence Interval |             |
|----------|--------|------------|-------------------------|-------------|
|          |        |            | Lower Bound             | Upper Bound |
| KI       | 63.495 | 1.189      | 61.111                  | 65.880      |
| WT       | 64.586 | 1.273      | 62.034                  | 67.138      |

### 2. SEX

Dependent Variable: HindpawGaitAngle

| SEX | Mean   | Std. Error | 95% Confidence Interval |             |
|-----|--------|------------|-------------------------|-------------|
|     |        |            | Lower Bound             | Upper Bound |
| F   | 63.606 | 1.247      | 61.104                  | 66.108      |
| M   | 64.476 | 1.213      | 62.043                  | 66.908      |

```
UNIANOVA BdyRotdeg BY GENOTYPE SEX
/METHOD=SSTYPE(3)
/INTERCEPT=INCLUDE
/EMMEANS=TABLES(GENOTYPE)
/EMMEANS=TABLES(SEX)
/PRINT ETASQ
/CRITERIA=ALPHA(.05)
/DESIGN=GENOTYPE SEX.
```

## Univariate Analysis of Variance

## Notes

|                        |                                |                                                                                                                                                                                               |
|------------------------|--------------------------------|-----------------------------------------------------------------------------------------------------------------------------------------------------------------------------------------------|
| Output Created         |                                | 22-AUG-2022 15:04:...                                                                                                                                                                         |
| Comments               |                                |                                                                                                                                                                                               |
| Input                  | Data                           | /Users/jeffneul/Jeff's Research/Neul Manuscripts/FoxG1/June 2022 stat sex and effect size/SPSS files/SPSS Data Files/June 2022 Gait sex EF data.sav                                           |
|                        | Active Dataset                 | DataSet4                                                                                                                                                                                      |
|                        | Filter                         | <none>                                                                                                                                                                                        |
|                        | Weight                         | <none>                                                                                                                                                                                        |
|                        | Split File                     | <none>                                                                                                                                                                                        |
|                        | N of Rows in Working Data File | 56                                                                                                                                                                                            |
| Missing Value Handling | Definition of Missing          | User-defined missing values are treated as missing.                                                                                                                                           |
|                        | Cases Used                     | Statistics are based on all cases with valid data for all variables in the model.                                                                                                             |
| Syntax                 |                                | <pre> UNIANOVA BdyRotdeg BY GENOTYPE SEX /METHOD=SSTYPE(3) /INTERCEPT=INCLUDE /EMMEANS=TABLES (GENOTYPE) /EMMEANS=TABLES (SEX) /PRINT ETASQ /CRITERIA=ALPHA(.05) /DESIGN=GENOTYPE SEX. </pre> |
| Resources              | Processor Time                 | 00:00:00.02                                                                                                                                                                                   |
|                        | Elapsed Time                   | 00:00:00.00                                                                                                                                                                                   |

### Between-Subjects Factors

|          |    | N  |
|----------|----|----|
| GENOTYPE | KI | 30 |
|          | WT | 26 |
| SEX      | F  | 27 |
|          | M  | 29 |

## Tests of Between-Subjects Effects

Dependent Variable: BdyRot(deg)

| Source          | Type III Sum of Squares | df | Mean Square | F      | Sig.  | Partial Eta Squared |
|-----------------|-------------------------|----|-------------|--------|-------|---------------------|
| Corrected Model | 66.424 <sup>a</sup>     | 2  | 33.212      | 5.270  | .008  | .166                |
| Intercept       | 147.715                 | 1  | 147.715     | 23.439 | <.001 | .307                |
| GENOTYPE        | 66.355                  | 1  | 66.355      | 10.529 | .002  | .166                |
| SEX             | .353                    | 1  | .353        | .056   | .814  | .001                |
| Error           | 334.014                 | 53 | 6.302       |        |       |                     |
| Total           | 563.129                 | 56 |             |        |       |                     |
| Corrected Total | 400.438                 | 55 |             |        |       |                     |

a. R Squared = .166 (Adjusted R Squared = .134)

## Estimated Marginal Means

### 1. GENOTYPE

Dependent Variable: BdyRot(deg)

| GENOTYPE | Mean   | Std. Error | 95% Confidence Interval |             |
|----------|--------|------------|-------------------------|-------------|
|          |        |            | Lower Bound             | Upper Bound |
| KI       | -2.726 | .461       | -3.650                  | -1.803      |
| WT       | -.532  | .493       | -1.520                  | .457        |

### 2. SEX

Dependent Variable: BdyRot(deg)

| SEX | Mean   | Std. Error | 95% Confidence Interval |             |
|-----|--------|------------|-------------------------|-------------|
|     |        |            | Lower Bound             | Upper Bound |
| F   | -1.709 | .483       | -2.678                  | -.739       |
| M   | -1.549 | .470       | -2.491                  | -.607       |

```
UNIANOVA LongitdPosmm BY GENOTYPE SEX
/METHOD=SSTYPE(3)
/INTERCEPT=INCLUDE
/EMMEANS=TABLES(GENOTYPE)
/EMMEANS=TABLES(SEX)
/PRINT ETASQ
/CRITERIA=ALPHA(.05)
/DESIGN=GENOTYPE SEX.
```

## Univariate Analysis of Variance

## Notes

|                        |                                |                                                                                                                                                                                                                                    |
|------------------------|--------------------------------|------------------------------------------------------------------------------------------------------------------------------------------------------------------------------------------------------------------------------------|
| Output Created         |                                | 22-AUG-2022 15:04:...                                                                                                                                                                                                              |
| Comments               |                                |                                                                                                                                                                                                                                    |
| Input                  | Data                           | /Users/jeffneul/Jeff's Research/Neul Manuscripts/FoxG1/June 2022 stat sex and effect size/SPSS files/SPSS Data Files/June 2022 Gait sex EF data.sav                                                                                |
|                        | Active Dataset                 | DataSet4                                                                                                                                                                                                                           |
|                        | Filter                         | <none>                                                                                                                                                                                                                             |
|                        | Weight                         | <none>                                                                                                                                                                                                                             |
|                        | Split File                     | <none>                                                                                                                                                                                                                             |
|                        | N of Rows in Working Data File | 56                                                                                                                                                                                                                                 |
| Missing Value Handling | Definition of Missing          | User-defined missing values are treated as missing.                                                                                                                                                                                |
|                        | Cases Used                     | Statistics are based on all cases with valid data for all variables in the model.                                                                                                                                                  |
| Syntax                 |                                | <pre> UNIANOVA   LongitdPosmm BY   GENOTYPE SEX   /METHOD=SSTYPE(3)   /INTERCEPT=INCLUDE   /EMMEANS=TABLES   (GENOTYPE)   /EMMEANS=TABLES   (SEX)   /PRINT ETASQ   /CRITERIA=ALPHA(.05)   /DESIGN=GENOTYPE   SEX.           </pre> |
| Resources              | Processor Time                 | 00:00:00.01                                                                                                                                                                                                                        |
|                        | Elapsed Time                   | 00:00:00.00                                                                                                                                                                                                                        |

### Between-Subjects Factors

|          |    | N  |
|----------|----|----|
| GENOTYPE | KI | 30 |
|          | WT | 26 |
| SEX      | F  | 27 |
|          | M  | 29 |

## Tests of Between-Subjects Effects

Dependent Variable: Longitd Pos(mm)

| Source          | Type III Sum of Squares | df | Mean Square | F        | Sig.  | Partial Eta Squared |
|-----------------|-------------------------|----|-------------|----------|-------|---------------------|
| Corrected Model | 298.939 <sup>a</sup>    | 2  | 149.470     | .538     | .587  | .020                |
| Intercept       | 441427.023              | 1  | 441427.023  | 1590.231 | <.001 | .968                |
| GENOTYPE        | 118.315                 | 1  | 118.315     | .426     | .517  | .008                |
| SEX             | 149.430                 | 1  | 149.430     | .538     | .466  | .010                |
| Error           | 14712.096               | 53 | 277.587     |          |       |                     |
| Total           | 460688.138              | 56 |             |          |       |                     |
| Corrected Total | 15011.036               | 55 |             |          |       |                     |

a. R Squared = .020 (Adjusted R Squared = -.017)

## Estimated Marginal Means

### 1. GENOTYPE

Dependent Variable: Longitd Pos(mm)

| GENOTYPE | Mean   | Std. Error | 95% Confidence Interval |             |
|----------|--------|------------|-------------------------|-------------|
|          |        |            | Lower Bound             | Upper Bound |
| KI       | 90.513 | 3.056      | 84.382                  | 96.643      |
| WT       | 87.582 | 3.272      | 81.019                  | 94.145      |

### 2. SEX

Dependent Variable: Longitd Pos(mm)

| SEX | Mean   | Std. Error | 95% Confidence Interval |             |
|-----|--------|------------|-------------------------|-------------|
|     |        |            | Lower Bound             | Upper Bound |
| F   | 87.404 | 3.207      | 80.970                  | 93.837      |
| M   | 90.691 | 3.118      | 84.437                  | 96.945      |

```
UNIANOVA LateralPosmm BY GENOTYPE SEX
/METHOD=SSTYPE(3)
/INTERCEPT=INCLUDE
/EMMEANS=TABLES(GENOTYPE)
/EMMEANS=TABLES(SEX)
/PRINT ETASQ
/CRITERIA=ALPHA(.05)
/DESIGN=GENOTYPE SEX.
```

## Univariate Analysis of Variance



## Notes

|                        |                                |                                                                                                                                                                                                                         |
|------------------------|--------------------------------|-------------------------------------------------------------------------------------------------------------------------------------------------------------------------------------------------------------------------|
| Output Created         |                                | 22-AUG-2022 15:05:...                                                                                                                                                                                                   |
| Comments               |                                |                                                                                                                                                                                                                         |
| Input                  | Data                           | /Users/jeffneul/Jeff's Research/Neul Manuscripts/FoxG1/June 2022 stat sex and effect size/SPSS files/SPSS Data Files/June 2022 Gait sex EF data.sav                                                                     |
|                        | Active Dataset                 | DataSet4                                                                                                                                                                                                                |
|                        | Filter                         | <none>                                                                                                                                                                                                                  |
|                        | Weight                         | <none>                                                                                                                                                                                                                  |
|                        | Split File                     | <none>                                                                                                                                                                                                                  |
|                        | N of Rows in Working Data File | 56                                                                                                                                                                                                                      |
| Missing Value Handling | Definition of Missing          | User-defined missing values are treated as missing.                                                                                                                                                                     |
|                        | Cases Used                     | Statistics are based on all cases with valid data for all variables in the model.                                                                                                                                       |
| Syntax                 |                                | UNIANOVA<br>LateralPosmm BY<br>GENOTYPE SEX<br>/METHOD=SSTYPE(3)<br>/INTERCEPT=INCLUDE<br>/EMMEANS=TABLES<br>(GENOTYPE)<br>/EMMEANS=TABLES<br>(SEX)<br>/PRINT ETASQ<br>/CRITERIA=ALPHA(.05)<br>/DESIGN=GENOTYPE<br>SEX. |
| Resources              | Processor Time                 | 00:00:00.02                                                                                                                                                                                                             |
|                        | Elapsed Time                   | 00:00:00.00                                                                                                                                                                                                             |

### Between-Subjects Factors

|          |    | N  |
|----------|----|----|
| GENOTYPE | KI | 30 |
|          | WT | 26 |
| SEX      | F  | 27 |
|          | M  | 29 |

### Tests of Between-Subjects Effects

Dependent Variable: Lateral Pos(mm)

| Source          | Type III Sum of Squares | df | Mean Square | F         | Sig.  |
|-----------------|-------------------------|----|-------------|-----------|-------|
| Corrected Model | 1.133 <sup>a</sup>      | 2  | .567        | .121      | .886  |
| Intercept       | 379662.921              | 1  | 379662.921  | 81186.734 | <.001 |
| GENOTYPE        | .596                    | 1  | .596        | .127      | .722  |
| SEX             | .656                    | 1  | .656        | .140      | .710  |
| Error           | 247.850                 | 53 | 4.676       |           |       |
| Total           | 382131.935              | 56 |             |           |       |
| Corrected Total | 248.983                 | 55 |             |           |       |

### Tests of Between-Subjects Effects

Dependent Variable: Lateral Pos(mm)

| Source          | Partial Eta Squared |
|-----------------|---------------------|
| Corrected Model | .005                |
| Intercept       | .999                |
| GENOTYPE        | .002                |
| SEX             | .003                |
| Error           |                     |
| Total           |                     |
| Corrected Total |                     |

a. R Squared = .005 (Adjusted R Squared = -.033)

## Estimated Marginal Means

### 1. GENOTYPE

Dependent Variable: Lateral Pos(mm)

| GENOTYPE | Mean   | Std. Error | 95% Confidence Interval |             |
|----------|--------|------------|-------------------------|-------------|
|          |        |            | Lower Bound             | Upper Bound |
| KI       | 82.479 | .397       | 81.683                  | 83.275      |
| WT       | 82.687 | .425       | 81.835                  | 83.539      |

## 2. SEX

Dependent Variable: Lateral Pos(mm)

| SEX | Mean   | Std. Error | 95% Confidence Interval |             |
|-----|--------|------------|-------------------------|-------------|
|     |        |            | Lower Bound             | Upper Bound |
| F   | 82.474 | .416       | 81.639                  | 83.309      |
| M   | 82.692 | .405       | 81.880                  | 83.503      |

## **Fear Conditioning**

```

UNIANOVA Prestim BY GENOTYPE SEX
/METHOD=SSTYPE(3)
/INTERCEPT=INCLUDE
/CRITERIA=ALPHA(.05)
/DESIGN=GENOTYPE SEX GENOTYPE*SEX.

```

## Univariate Analysis of Variance

### Notes

|                        |                                |                                                                                                                                                   |
|------------------------|--------------------------------|---------------------------------------------------------------------------------------------------------------------------------------------------|
| Output Created         |                                | 22-AUG-2022 16:01:...                                                                                                                             |
| Comments               |                                |                                                                                                                                                   |
| Input                  | Data                           | /Users/jeffneul/Jeff's Research/Neul Manuscripts/FoxG1/June 2022 stat sex and effect size/SPSS files/SPSS Data Files/June 2022 CF sex EF data.sav |
|                        | Active Dataset                 | DataSet5                                                                                                                                          |
|                        | Filter                         | <none>                                                                                                                                            |
|                        | Weight                         | <none>                                                                                                                                            |
|                        | Split File                     | <none>                                                                                                                                            |
|                        | N of Rows in Working Data File | 30                                                                                                                                                |
| Missing Value Handling | Definition of Missing          | User-defined missing values are treated as missing.                                                                                               |
|                        | Cases Used                     | Statistics are based on all cases with valid data for all variables in the model.                                                                 |
| Syntax                 |                                | UNIANOVA Prestim BY GENOTYPE SEX<br>/METHOD=SSTYPE(3)<br>/INTERCEPT=INCLUDE<br>/CRITERIA=ALPHA(.05)<br>/DESIGN=GENOTYPE SEX GENOTYPE*SEX.         |
| Resources              | Processor Time                 | 00:00:00.01                                                                                                                                       |
|                        | Elapsed Time                   | 00:00:00.00                                                                                                                                       |

## Between-Subjects Factors

|          |    | N  |
|----------|----|----|
| GENOTYPE | KI | 15 |
|          | WT | 15 |
| SEX      | F  | 14 |
|          | M  | 16 |

## Tests of Between-Subjects Effects

Dependent Variable: Pre-stim

| Source          | Type III Sum of Squares | df | Mean Square | F       | Sig.  |
|-----------------|-------------------------|----|-------------|---------|-------|
| Corrected Model | .093 <sup>a</sup>       | 3  | .031        | 4.811   | .009  |
| Intercept       | 2.695                   | 1  | 2.695       | 417.729 | <.001 |
| GENOTYPE        | .083                    | 1  | .083        | 12.801  | .001  |
| SEX             | .010                    | 1  | .010        | 1.561   | .223  |
| GENOTYPE * SEX  | 4.409E-6                | 1  | 4.409E-6    | .001    | .979  |
| Error           | .168                    | 26 | .006        |         |       |
| Total           | 2.990                   | 30 |             |         |       |
| Corrected Total | .261                    | 29 |             |         |       |

a. R Squared = .357 (Adjusted R Squared = .283)

```
UNIANOVA ContextPrestimBY GENOTYPE SEX
/METHOD=SSTYPE(3)
/INTERCEPT=INCLUDE
/CRITERIA=ALPHA(.05)
/DESIGN=GENOTYPE SEX GENOTYPE*SEX.
```

## Univariate Analysis of Variance

## Notes

|                        |                                |                                                                                                                                                           |
|------------------------|--------------------------------|-----------------------------------------------------------------------------------------------------------------------------------------------------------|
| Output Created         |                                | 22-AUG-2022 16:01:...                                                                                                                                     |
| Comments               |                                |                                                                                                                                                           |
| Input                  | Data                           | /Users/jeffneul/Jeff's Research/Neul Manuscripts/FoxG1/June 2022 stat sex and effect size/SPSS files/SPSS Data Files/June 2022 CF sex EF data.sav         |
|                        | Active Dataset                 | DataSet5                                                                                                                                                  |
|                        | Filter                         | <none>                                                                                                                                                    |
|                        | Weight                         | <none>                                                                                                                                                    |
|                        | Split File                     | <none>                                                                                                                                                    |
|                        | N of Rows in Working Data File | 30                                                                                                                                                        |
| Missing Value Handling | Definition of Missing          | User-defined missing values are treated as missing.                                                                                                       |
|                        | Cases Used                     | Statistics are based on all cases with valid data for all variables in the model.                                                                         |
| Syntax                 |                                | UNIANOVA<br>ContextPrestim BY<br>GENOTYPE SEX<br>/METHOD=SSTYPE(3)<br>/INTERCEPT=INCLUDE<br>/CRITERIA=ALPHA(.05)<br>/DESIGN=GENOTYPE<br>SEX GENOTYPE*SEX. |
| Resources              | Processor Time                 | 00:00:00.01                                                                                                                                               |
|                        | Elapsed Time                   | 00:00:00.00                                                                                                                                               |

### Between-Subjects Factors

|          |    | N  |
|----------|----|----|
| GENOTYPE | KI | 15 |
|          | WT | 15 |
| SEX      | F  | 14 |
|          | M  | 16 |

## Tests of Between-Subjects Effects

Dependent Variable: Context-Prestim

| Source          | Type III Sum of Squares | df | Mean Square | F       | Sig.  |
|-----------------|-------------------------|----|-------------|---------|-------|
| Corrected Model | .383 <sup>a</sup>       | 3  | .128        | 8.295   | <.001 |
| Intercept       | 4.547                   | 1  | 4.547       | 295.587 | <.001 |
| GENOTYPE        | .376                    | 1  | .376        | 24.417  | <.001 |
| SEX             | .003                    | 1  | .003        | .195    | .663  |
| GENOTYPE * SEX  | .001                    | 1  | .001        | .037    | .848  |
| Error           | .400                    | 26 | .015        |         |       |
| Total           | 5.335                   | 30 |             |         |       |
| Corrected Total | .783                    | 29 |             |         |       |

a. R Squared = .489 (Adjusted R Squared = .430)

```
UNIANOVA CuePrestim BY GENOTYPE SEX
/METHOD=SSTYPE(3)
/INTERCEPT=INCLUDE
/CRITERIA=ALPHA(.05)
/DESIGN=GENOTYPE SEX GENOTYPE*SEX.
```

## Univariate Analysis of Variance



## Notes

|                        |                                |                                                                                                                                                   |
|------------------------|--------------------------------|---------------------------------------------------------------------------------------------------------------------------------------------------|
| Output Created         |                                | 22-AUG-2022 16:01:...                                                                                                                             |
| Comments               |                                |                                                                                                                                                   |
| Input                  | Data                           | /Users/jeffneul/Jeff's Research/Neul Manuscripts/FoxG1/June 2022 stat sex and effect size/SPSS files/SPSS Data Files/June 2022 CF sex EF data.sav |
|                        | Active Dataset                 | DataSet5                                                                                                                                          |
|                        | Filter                         | <none>                                                                                                                                            |
|                        | Weight                         | <none>                                                                                                                                            |
|                        | Split File                     | <none>                                                                                                                                            |
|                        | N of Rows in Working Data File | 30                                                                                                                                                |
| Missing Value Handling | Definition of Missing          | User-defined missing values are treated as missing.                                                                                               |
|                        | Cases Used                     | Statistics are based on all cases with valid data for all variables in the model.                                                                 |
| Syntax                 |                                | UNIANOVA CuePrestim BY GENOTYPE SEX /METHOD=SSTYPE(3) /INTERCEPT=INCLUDE /CRITERIA=ALPHA(.05) /DESIGN=GENOTYPE SEX GENOTYPE*SEX.                  |
| Resources              | Processor Time                 | 00:00:00.01                                                                                                                                       |
|                        | Elapsed Time                   | 00:00:00.00                                                                                                                                       |

### Between-Subjects Factors

|          |    | N  |
|----------|----|----|
| GENOTYPE | KI | 15 |
|          | WT | 15 |
| SEX      | F  | 14 |
|          | M  | 16 |

## Tests of Between-Subjects Effects

Dependent Variable: Cue-Prestim

| Source          | Type III Sum of Squares | df | Mean Square | F       | Sig.  |
|-----------------|-------------------------|----|-------------|---------|-------|
| Corrected Model | .323 <sup>a</sup>       | 3  | .108        | 9.118   | <.001 |
| Intercept       | 7.643                   | 1  | 7.643       | 647.674 | <.001 |
| GENOTYPE        | .300                    | 1  | .300        | 25.389  | <.001 |
| SEX             | .016                    | 1  | .016        | 1.316   | .262  |
| GENOTYPE * SEX  | .003                    | 1  | .003        | .219    | .644  |
| Error           | .307                    | 26 | .012        |         |       |
| Total           | 8.261                   | 30 |             |         |       |
| Corrected Total | .630                    | 29 |             |         |       |

a. R Squared = .513 (Adjusted R Squared = .456)

```
UNIANOVA Prestim BY GENOTYPE SEX
/METHOD=SSTYPE(3)
/INTERCEPT=INCLUDE
/EMMEANS=TABLES(GENOTYPE)
/EMMEANS=TABLES(SEX)
/PRINT ETASQ
/CRITERIA=ALPHA(.05)
/DESIGN=GENOTYPE SEX.
```

## Univariate Analysis of Variance

## Notes

|                        |                                |                                                                                                                                                                                                     |
|------------------------|--------------------------------|-----------------------------------------------------------------------------------------------------------------------------------------------------------------------------------------------------|
| Output Created         |                                | 22-AUG-2022 16:03:...                                                                                                                                                                               |
| Comments               |                                |                                                                                                                                                                                                     |
| Input                  | Data                           | /Users/jeffneul/Jeff's Research/Neul Manuscripts/FoxG1/June 2022 stat sex and effect size/SPSS files/SPSS Data Files/June 2022 CF sex EF data.sav                                                   |
|                        | Active Dataset                 | DataSet5                                                                                                                                                                                            |
|                        | Filter                         | <none>                                                                                                                                                                                              |
|                        | Weight                         | <none>                                                                                                                                                                                              |
|                        | Split File                     | <none>                                                                                                                                                                                              |
|                        | N of Rows in Working Data File | 30                                                                                                                                                                                                  |
| Missing Value Handling | Definition of Missing          | User-defined missing values are treated as missing.                                                                                                                                                 |
|                        | Cases Used                     | Statistics are based on all cases with valid data for all variables in the model.                                                                                                                   |
| Syntax                 |                                | UNIANOVA Prestim BY GENOTYPE SEX<br>/METHOD=SSTYPE(3)<br>/INTERCEPT=INCLUDE<br>/EMMEANS=TABLES (GENOTYPE)<br>/EMMEANS=TABLES (SEX)<br>/PRINT ETASQ<br>/CRITERIA=ALPHA(.05)<br>/DESIGN=GENOTYPE SEX. |
| Resources              | Processor Time                 | 00:00:00.01                                                                                                                                                                                         |
|                        | Elapsed Time                   | 00:00:00.00                                                                                                                                                                                         |

### Between-Subjects Factors

|          |    | N  |
|----------|----|----|
| GENOTYPE | KI | 15 |
|          | WT | 15 |
| SEX      | F  | 14 |
|          | M  | 16 |

## Tests of Between-Subjects Effects

Dependent Variable: Pre-stim

| Source          | Type III Sum of Squares | df | Mean Square | F       | Sig.  | Partial Eta Squared |
|-----------------|-------------------------|----|-------------|---------|-------|---------------------|
| Corrected Model | .093 <sup>a</sup>       | 2  | .047        | 7.493   | .003  | .357                |
| Intercept       | 2.695                   | 1  | 2.695       | 433.784 | <.001 | .941                |
| GENOTYPE        | .083                    | 1  | .083        | 13.365  | .001  | .331                |
| SEX             | .010                    | 1  | .010        | 1.621   | .214  | .057                |
| Error           | .168                    | 27 | .006        |         |       |                     |
| Total           | 2.990                   | 30 |             |         |       |                     |
| Corrected Total | .261                    | 29 |             |         |       |                     |

a. R Squared = .357 (Adjusted R Squared = .309)

## Estimated Marginal Means

### 1. GENOTYPE

Dependent Variable: Pre-stim

| GENOTYPE | Mean | Std. Error | 95% Confidence Interval |             |
|----------|------|------------|-------------------------|-------------|
|          |      |            | Lower Bound             | Upper Bound |
| KI       | .353 | .020       | .311                    | .395        |
| WT       | .248 | .020       | .206                    | .290        |

### 2. SEX

Dependent Variable: Pre-stim

| SEX | Mean | Std. Error | 95% Confidence Interval |             |
|-----|------|------------|-------------------------|-------------|
|     |      |            | Lower Bound             | Upper Bound |
| F   | .282 | .021       | .239                    | .325        |
| M   | .319 | .020       | .278                    | .359        |

```
UNIANOVA ContextPrestimBY GENOTYPE SEX
/METHOD=SSTYPE(3)
/INTERCEPT=INCLUDE
/EMMEANS=TABLES(GENOTYPE)
/EMMEANS=TABLES(SEX)
/PRINT ETASQ
/CRITERIA=ALPHA(.05)
/DESIGN=GENOTYPE SEX.
```

## Univariate Analysis of Variance

## Notes

|                        |                                |                                                                                                                                                                                                    |
|------------------------|--------------------------------|----------------------------------------------------------------------------------------------------------------------------------------------------------------------------------------------------|
| Output Created         |                                | 22-AUG-2022 16:04:...                                                                                                                                                                              |
| Comments               |                                |                                                                                                                                                                                                    |
| Input                  | Data                           | /Users/jeffneul/Jeff's Research/Neul Manuscripts/FoxG1/June 2022 stat sex and effect size/SPSS files/SPSS Data Files/June 2022 CF sex EF data.sav                                                  |
|                        | Active Dataset                 | DataSet5                                                                                                                                                                                           |
|                        | Filter                         | <none>                                                                                                                                                                                             |
|                        | Weight                         | <none>                                                                                                                                                                                             |
|                        | Split File                     | <none>                                                                                                                                                                                             |
|                        | N of Rows in Working Data File | 30                                                                                                                                                                                                 |
| Missing Value Handling | Definition of Missing          | User-defined missing values are treated as missing.                                                                                                                                                |
|                        | Cases Used                     | Statistics are based on all cases with valid data for all variables in the model.                                                                                                                  |
| Syntax                 |                                | <pre> UNIANOVA ContextPrestim BY GENOTYPE SEX /METHOD=SSTYPE(3) /INTERCEPT=INCLUDE /EMMEANS=TABLES (GENOTYPE) /EMMEANS=TABLES (SEX) /PRINT ETASQ /CRITERIA=ALPHA(.05) /DESIGN=GENOTYPE SEX. </pre> |
| Resources              | Processor Time                 | 00:00:00.02                                                                                                                                                                                        |
|                        | Elapsed Time                   | 00:00:00.00                                                                                                                                                                                        |

### Between-Subjects Factors

|          |    | N  |
|----------|----|----|
| GENOTYPE | KI | 15 |
|          | WT | 15 |
| SEX      | F  | 14 |
|          | M  | 16 |

## Tests of Between-Subjects Effects

Dependent Variable: Context-Prestim

| Source          | Type III Sum of Squares | df | Mean Square | F       | Sig.  | Partial Eta Squared |
|-----------------|-------------------------|----|-------------|---------|-------|---------------------|
| Corrected Model | .382 <sup>a</sup>       | 2  | .191        | 12.884  | <.001 | .488                |
| Intercept       | 4.547                   | 1  | 4.547       | 306.515 | <.001 | .919                |
| GENOTYPE        | .379                    | 1  | .379        | 25.566  | <.001 | .486                |
| SEX             | .003                    | 1  | .003        | .202    | .657  | .007                |
| Error           | .401                    | 27 | .015        |         |       |                     |
| Total           | 5.335                   | 30 |             |         |       |                     |
| Corrected Total | .783                    | 29 |             |         |       |                     |

a. R Squared = .488 (Adjusted R Squared = .450)

## Estimated Marginal Means

### 1. GENOTYPE

Dependent Variable: Context-Prestim

| GENOTYPE | Mean | Std. Error | 95% Confidence Interval |             |
|----------|------|------------|-------------------------|-------------|
|          |      |            | Lower Bound             | Upper Bound |
| KI       | .278 | .031       | .213                    | .342        |
| WT       | .503 | .031       | .438                    | .567        |

### 2. SEX

Dependent Variable: Context-Prestim

| SEX | Mean | Std. Error | 95% Confidence Interval |             |
|-----|------|------------|-------------------------|-------------|
|     |      |            | Lower Bound             | Upper Bound |
| F   | .400 | .033       | .333                    | .467        |
| M   | .380 | .030       | .318                    | .443        |

```

UNIANOVA CuePrestim BY GENOTYPE SEX
/METHOD=SSTYPE(3)
/INTERCEPT=INCLUDE
/EMMEANS=TABLES(GENOTYPE)
/EMMEANS=TABLES(SEX)
/PRINT ETASQ
/CRITERIA=ALPHA(.05)
/DESIGN=GENOTYPE SEX.

```

## Univariate Analysis of Variance

## Notes

|                        |                                |                                                                                                                                                                                   |
|------------------------|--------------------------------|-----------------------------------------------------------------------------------------------------------------------------------------------------------------------------------|
| Output Created         |                                | 22-AUG-2022 16:04:...                                                                                                                                                             |
| Comments               |                                |                                                                                                                                                                                   |
| Input                  | Data                           | /Users/jeffneul/Jeff's Research/Neul Manuscripts/FoxG1/June 2022 stat sex and effect size/SPSS files/SPSS Data Files/June 2022 CF sex EF data.sav                                 |
|                        | Active Dataset                 | DataSet5                                                                                                                                                                          |
|                        | Filter                         | <none>                                                                                                                                                                            |
|                        | Weight                         | <none>                                                                                                                                                                            |
|                        | Split File                     | <none>                                                                                                                                                                            |
|                        | N of Rows in Working Data File | 30                                                                                                                                                                                |
| Missing Value Handling | Definition of Missing          | User-defined missing values are treated as missing.                                                                                                                               |
|                        | Cases Used                     | Statistics are based on all cases with valid data for all variables in the model.                                                                                                 |
| Syntax                 |                                | UNIANOVA CuePrestim BY GENOTYPE SEX /METHOD=SSTYPE(3) /INTERCEPT=INCLUDE /EMMEANS=TABLES (GENOTYPE) /EMMEANS=TABLES (SEX) /PRINT ETASQ /CRITERIA=ALPHA(.05) /DESIGN=GENOTYPE SEX. |
| Resources              | Processor Time                 | 00:00:00.02                                                                                                                                                                       |
|                        | Elapsed Time                   | 00:00:00.00                                                                                                                                                                       |

### Between-Subjects Factors

|          |    | N  |
|----------|----|----|
| GENOTYPE | KI | 15 |
|          | WT | 15 |
| SEX      | F  | 14 |
|          | M  | 16 |

## Tests of Between-Subjects Effects

Dependent Variable: Cue-Prestim

| Source          | Type III Sum of Squares | df | Mean Square | F       | Sig.  | Partial Eta Squared |
|-----------------|-------------------------|----|-------------|---------|-------|---------------------|
| Corrected Model | .320 <sup>a</sup>       | 2  | .160        | 13.972  | <.001 | .509                |
| Intercept       | 7.643                   | 1  | 7.643       | 666.962 | <.001 | .961                |
| GENOTYPE        | .305                    | 1  | .305        | 26.588  | <.001 | .496                |
| SEX             | .016                    | 1  | .016        | 1.355   | .255  | .048                |
| Error           | .309                    | 27 | .011        |         |       |                     |
| Total           | 8.261                   | 30 |             |         |       |                     |
| Corrected Total | .630                    | 29 |             |         |       |                     |

a. R Squared = .509 (Adjusted R Squared = .472)

## Estimated Marginal Means

### 1. GENOTYPE

Dependent Variable: Cue-Prestim

| GENOTYPE | Mean | Std. Error | 95% Confidence Interval |             |
|----------|------|------------|-------------------------|-------------|
|          |      |            | Lower Bound             | Upper Bound |
| KI       | .405 | .028       | .348                    | .462        |
| WT       | .607 | .028       | .550                    | .663        |

### 2. SEX

Dependent Variable: Cue-Prestim

| SEX | Mean | Std. Error | 95% Confidence Interval |             |
|-----|------|------------|-------------------------|-------------|
|     |      |            | Lower Bound             | Upper Bound |
| F   | .529 | .029       | .470                    | .587        |
| M   | .483 | .027       | .428                    | .538        |



## **Marble Burying**

```

UNIANOVA BURRIED BY GENOTYPE SEX
/METHOD=SSTYPE(3)
/INTERCEPT=INCLUDE
/CRITERIA=ALPHA(0.05)
/DESIGN=GENOTYPE SEX GENOTYPE*SEX.

```

## Univariate Analysis of Variance

### Notes

|                        |                                |                                                                                                                                                       |
|------------------------|--------------------------------|-------------------------------------------------------------------------------------------------------------------------------------------------------|
| Output Created         |                                | 22-AUG-2022 16:28:...                                                                                                                                 |
| Comments               |                                |                                                                                                                                                       |
| Input                  | Data                           | /Users/jeffneul/Jeff's Research/Neul Manuscripts/FoxG1/June 2022 stat sex and effect size/SPSS files/SPSS Data Files/June 2022 marble sex EF data.sav |
|                        | Active Dataset                 | DataSet6                                                                                                                                              |
|                        | Filter                         | <none>                                                                                                                                                |
|                        | Weight                         | <none>                                                                                                                                                |
|                        | Split File                     | <none>                                                                                                                                                |
|                        | N of Rows in Working Data File | 30                                                                                                                                                    |
| Missing Value Handling | Definition of Missing          | User-defined missing values are treated as missing.                                                                                                   |
|                        | Cases Used                     | Statistics are based on all cases with valid data for all variables in the model.                                                                     |
| Syntax                 |                                | UNIANOVA BURRIED BY GENOTYPE SEX<br>/METHOD=SSTYPE(3)<br>/INTERCEPT=INCLUDE<br>/CRITERIA=ALPHA (0.05)<br>/DESIGN=GENOTYPE SEX GENOTYPE*SEX.           |
| Resources              | Processor Time                 | 00:00:00.01                                                                                                                                           |
|                        | Elapsed Time                   | 00:00:00.00                                                                                                                                           |

## Between-Subjects Factors

|          |    | N  |
|----------|----|----|
| GENOTYPE | KI | 15 |
|          | WT | 15 |
| SEX      | F  | 14 |
|          | M  | 16 |

## Tests of Between-Subjects Effects

Dependent Variable: %BURRIED

| Source          | Type III Sum of Squares | df | Mean Square | F       | Sig.  |
|-----------------|-------------------------|----|-------------|---------|-------|
| Corrected Model | 2612.649 <sup>a</sup>   | 3  | 870.883     | 1.723   | .187  |
| Intercept       | 71696.801               | 1  | 71696.801   | 141.849 | <.001 |
| GENOTYPE        | 2275.015                | 1  | 2275.015    | 4.501   | .044  |
| SEX             | 196.801                 | 1  | 196.801     | .389    | .538  |
| GENOTYPE * SEX  | 75.015                  | 1  | 75.015      | .148    | .703  |
| Error           | 13141.518               | 26 | 505.443     |         |       |
| Total           | 88275.000               | 30 |             |         |       |
| Corrected Total | 15754.167               | 29 |             |         |       |

a. R Squared = .166 (Adjusted R Squared = .070)

```
UNIANOVA BURRIED BY GENOTYPE SEX
/METHOD=SSTYPE(3)
/INTERCEPT=INCLUDE
/EMMEANS=TABLES(GENOTYPE)
/EMMEANS=TABLES(SEX)
/PRINT ETASQ
/CRITERIA=ALPHA(.05)
/DESIGN=GENOTYPE SEX.
```

## Univariate Analysis of Variance

## Notes

|                        |                                |                                                                                                                                                                                                     |
|------------------------|--------------------------------|-----------------------------------------------------------------------------------------------------------------------------------------------------------------------------------------------------|
| Output Created         |                                | 22-AUG-2022 16:28:...                                                                                                                                                                               |
| Comments               |                                |                                                                                                                                                                                                     |
| Input                  | Data                           | /Users/jeffneul/Jeff's Research/Neul Manuscripts/FoxG1/June 2022 stat sex and effect size/SPSS files/SPSS Data Files/June 2022 marble sex EF data.sav                                               |
|                        | Active Dataset                 | DataSet6                                                                                                                                                                                            |
|                        | Filter                         | <none>                                                                                                                                                                                              |
|                        | Weight                         | <none>                                                                                                                                                                                              |
|                        | Split File                     | <none>                                                                                                                                                                                              |
|                        | N of Rows in Working Data File | 30                                                                                                                                                                                                  |
| Missing Value Handling | Definition of Missing          | User-defined missing values are treated as missing.                                                                                                                                                 |
|                        | Cases Used                     | Statistics are based on all cases with valid data for all variables in the model.                                                                                                                   |
| Syntax                 |                                | UNIANOVA BURRIED BY GENOTYPE SEX<br>/METHOD=SSTYPE(3)<br>/INTERCEPT=INCLUDE<br>/EMMEANS=TABLES (GENOTYPE)<br>/EMMEANS=TABLES (SEX)<br>/PRINT ETASQ<br>/CRITERIA=ALPHA(.05)<br>/DESIGN=GENOTYPE SEX. |
| Resources              | Processor Time                 | 00:00:00.01                                                                                                                                                                                         |
|                        | Elapsed Time                   | 00:00:00.00                                                                                                                                                                                         |

### Between-Subjects Factors

|          |    | N  |
|----------|----|----|
| GENOTYPE | KI | 15 |
|          | WT | 15 |
| SEX      | F  | 14 |
|          | M  | 16 |

## Tests of Between-Subjects Effects

Dependent Variable: %BURRIED

| Source          | Type III Sum of Squares | df | Mean Square | F       | Sig.  | Partial Eta Squared |
|-----------------|-------------------------|----|-------------|---------|-------|---------------------|
| Corrected Model | 2537.634 <sup>a</sup>   | 2  | 1268.817    | 2.592   | .093  | .161                |
| Intercept       | 71696.801               | 1  | 71696.801   | 146.469 | <.001 | .844                |
| GENOTYPE        | 2340.833                | 1  | 2340.833    | 4.782   | .038  | .150                |
| SEX             | 196.801                 | 1  | 196.801     | .402    | .531  | .015                |
| Error           | 13216.533               | 27 | 489.501     |         |       |                     |
| Total           | 88275.000               | 30 |             |         |       |                     |
| Corrected Total | 15754.167               | 29 |             |         |       |                     |

a. R Squared = .161 (Adjusted R Squared = .099)

## Estimated Marginal Means

### 1. GENOTYPE

Dependent Variable: %BURRIED

| GENOTYPE | Mean   | Std. Error | 95% Confidence Interval |             |
|----------|--------|------------|-------------------------|-------------|
|          |        |            | Lower Bound             | Upper Bound |
| KI       | 40.162 | 5.719      | 28.428                  | 51.896      |
| WT       | 57.829 | 5.719      | 46.095                  | 69.563      |

### 2. SEX

Dependent Variable: %BURRIED

| SEX | Mean   | Std. Error | 95% Confidence Interval |             |
|-----|--------|------------|-------------------------|-------------|
|     |        |            | Lower Bound             | Upper Bound |
| F   | 46.429 | 5.913      | 34.296                  | 58.561      |
| M   | 51.563 | 5.531      | 40.213                  | 62.912      |

## Tube Test

```

UNIANOVA Average BY Genotype Sex
/METHOD=SSTYPE(3)
/INTERCEPT=INCLUDE
/CRITERIA=ALPHA(0.05)
/DESIGN=Genotype Sex Genotype*Sex.

```

## Univariate Analysis of Variance

### Notes

|                        |                                |                                                                                                                                                    |
|------------------------|--------------------------------|----------------------------------------------------------------------------------------------------------------------------------------------------|
| Output Created         |                                | 22-AUG-2022 16:41:...                                                                                                                              |
| Comments               |                                |                                                                                                                                                    |
| Input                  | Data                           | /Users/jeffneul/Jeff's Research/Neul Manuscripts/FoxG1/June 2022 stat sex and effect size/SPSS files/SPSS Data Files/June 2022 Tubesex EF data.sav |
|                        | Active Dataset                 | DataSet7                                                                                                                                           |
|                        | Filter                         | <none>                                                                                                                                             |
|                        | Weight                         | <none>                                                                                                                                             |
|                        | Split File                     | <none>                                                                                                                                             |
|                        | N of Rows in Working Data File | 30                                                                                                                                                 |
| Missing Value Handling | Definition of Missing          | User-defined missing values are treated as missing.                                                                                                |
|                        | Cases Used                     | Statistics are based on all cases with valid data for all variables in the model.                                                                  |
| Syntax                 |                                | UNIANOVA Average BY Genotype Sex<br>/METHOD=SSTYPE(3)<br>/INTERCEPT=INCLUDE<br>/CRITERIA=ALPHA(0.05)<br>/DESIGN=Genotype Sex Genotype*Sex.         |
| Resources              | Processor Time                 | 00:00:00.01                                                                                                                                        |
|                        | Elapsed Time                   | 00:00:00.00                                                                                                                                        |

## Between-Subjects Factors

|          |    | N  |
|----------|----|----|
| Genotype | KI | 15 |
|          | WT | 15 |
| Sex      | F  | 14 |
|          | M  | 16 |

## Tests of Between-Subjects Effects

Dependent Variable: Average

| Source          | Type III Sum of Squares | df | Mean Square | F      | Sig.  |
|-----------------|-------------------------|----|-------------|--------|-------|
| Corrected Model | 1.694 <sup>a</sup>      | 3  | .565        | 3.627  | .026  |
| Intercept       | 6.649                   | 1  | 6.649       | 42.712 | <.001 |
| Genotype        | 1.064                   | 1  | 1.064       | 6.834  | .015  |
| Sex             | .337                    | 1  | .337        | 2.162  | .153  |
| Genotype * Sex  | .337                    | 1  | .337        | 2.162  | .153  |
| Error           | 4.048                   | 26 | .156        |        |       |
| Total           | 12.750                  | 30 |             |        |       |
| Corrected Total | 5.742                   | 29 |             |        |       |

a. R Squared = .295 (Adjusted R Squared = .214)

```
UNIANOVA Average BY Genotype Sex
/METHOD=SSTYPE(3)
/INTERCEPT=INCLUDE
/EMMEANS=TABLES(Genotype)
/EMMEANS=TABLES(Sex)
/PRINT ETASQ
/CRITERIA=ALPHA(.05)
/DESIGN=Genotype Sex.
```

## Univariate Analysis of Variance



## Notes

|                        |                                |                                                                                                                                                                                             |
|------------------------|--------------------------------|---------------------------------------------------------------------------------------------------------------------------------------------------------------------------------------------|
| Output Created         |                                | 22-AUG-2022 16:41:...                                                                                                                                                                       |
| Comments               |                                |                                                                                                                                                                                             |
| Input                  | Data                           | /Users/jeffneul/Jeff's Research/Neul Manuscripts/FoxG1/June 2022 stat sex and effect size/SPSS files/SPSS Data Files/June 2022 Tube sex EF data.sav                                         |
|                        | Active Dataset                 | DataSet7                                                                                                                                                                                    |
|                        | Filter                         | <none>                                                                                                                                                                                      |
|                        | Weight                         | <none>                                                                                                                                                                                      |
|                        | Split File                     | <none>                                                                                                                                                                                      |
|                        | N of Rows in Working Data File | 30                                                                                                                                                                                          |
| Missing Value Handling | Definition of Missing          | User-defined missing values are treated as missing.                                                                                                                                         |
|                        | Cases Used                     | Statistics are based on all cases with valid data for all variables in the model.                                                                                                           |
| Syntax                 |                                | <pre> UNIANOVA Average BY Genotype Sex /METHOD=SSTYPE(3) /INTERCEPT=INCLUDE /EMMEANS=TABLES (Genotype) /EMMEANS=TABLES (Sex) /PRINT ETASQ /CRITERIA=ALPHA(.05) /DESIGN=Genotype Sex. </pre> |
| Resources              | Processor Time                 | 00:00:00.02                                                                                                                                                                                 |
|                        | Elapsed Time                   | 00:00:00.00                                                                                                                                                                                 |

### Between-Subjects Factors

|          |    | N  |
|----------|----|----|
| Genotype | KI | 15 |
|          | WT | 15 |
| Sex      | F  | 14 |
|          | M  | 16 |

## Tests of Between-Subjects Effects

Dependent Variable: Average

| Source          | Type III Sum of Squares | df | Mean Square | F      | Sig.  | Partial Eta Squared |
|-----------------|-------------------------|----|-------------|--------|-------|---------------------|
| Corrected Model | 1.357 <sup>a</sup>      | 2  | .679        | 4.180  | .026  | .236                |
| Intercept       | 7.188                   | 1  | 7.188       | 44.268 | <.001 | .621                |
| Genotype        | 1.154                   | 1  | 1.154       | 7.105  | .013  | .208                |
| Sex             | .349                    | 1  | .349        | 2.150  | .154  | .074                |
| Error           | 4.384                   | 27 | .162        |        |       |                     |
| Total           | 12.750                  | 30 |             |        |       |                     |
| Corrected Total | 5.742                   | 29 |             |        |       |                     |

a. R Squared = .236 (Adjusted R Squared = .180)

## Estimated Marginal Means

### 1. Genotype

Dependent Variable: Average

| Genotype | Mean | Std. Error | 95% Confidence Interval |             |
|----------|------|------------|-------------------------|-------------|
|          |      |            | Lower Bound             | Upper Bound |
| KI       | .688 | .105       | .473                    | .904        |
| WT       | .293 | .104       | .079                    | .506        |

### 2. Sex

Dependent Variable: Average

| Sex | Mean | Std. Error | 95% Confidence Interval |             |
|-----|------|------------|-------------------------|-------------|
|     |      |            | Lower Bound             | Upper Bound |
| F   | .600 | .108       | .378                    | .822        |
| M   | .382 | .101       | .174                    | .589        |

## **Nest Building**

```

UNIANOVA NestScore BY Genotype Sex
/METHOD=SSTYPE(3)
/INTERCEPT=INCLUDE
/CRITERIA=ALPHA(0.05)
/DESIGN=Genotype Sex Genotype*Sex.

```

## Univariate Analysis of Variance

### Notes

|                        |                                |                                                                                                                                                         |
|------------------------|--------------------------------|---------------------------------------------------------------------------------------------------------------------------------------------------------|
| Output Created         |                                | 23-AUG-2022 14:24:...                                                                                                                                   |
| Comments               |                                |                                                                                                                                                         |
| Input                  | Data                           | /Users/jeffneul/Jeff's Research/Neul Manuscripts/FoxG1/June_Aug 2022 stat sex and effect size/SPSS files/SPSS Data Files/June 2022 Nest sex EF data.sav |
|                        | Active Dataset                 | DataSet4                                                                                                                                                |
|                        | Filter                         | <none>                                                                                                                                                  |
|                        | Weight                         | <none>                                                                                                                                                  |
|                        | Split File                     | <none>                                                                                                                                                  |
|                        | N of Rows in Working Data File | 30                                                                                                                                                      |
| Missing Value Handling | Definition of Missing          | User-defined missing values are treated as missing.                                                                                                     |
|                        | Cases Used                     | Statistics are based on all cases with valid data for all variables in the model.                                                                       |
| Syntax                 |                                | UNIANOVA NestScore BY Genotype Sex<br>/METHOD=SSTYPE(3)<br>/INTERCEPT=INCLUDE<br>/CRITERIA=ALPHA(0.05)<br>/DESIGN=Genotype Sex Genotype*Sex.            |
| Resources              | Processor Time                 | 00:00:00.01                                                                                                                                             |
|                        | Elapsed Time                   | 00:00:00.00                                                                                                                                             |

```

[DataSet4] /Users/jeffneul/Jeff's Research/Neul Manuscripts/FoxG1/June_Aug 2022 stat sex and effect size/SPSS files/SPSS Data Files/June 2022 Nest sex EF data.sav

```

## Between-Subjects Factors

|          |    | N  |
|----------|----|----|
| Genotype | KI | 15 |
|          | WT | 15 |
| Sex      | F  | 14 |
|          | M  | 16 |

## Tests of Between-Subjects Effects

Dependent Variable: Nest Score

| Source          | Type III Sum of Squares | df | Mean Square | F       | Sig.  |
|-----------------|-------------------------|----|-------------|---------|-------|
| Corrected Model | 7.094 <sup>a</sup>      | 3  | 2.365       | 2.340   | .097  |
| Intercept       | 535.507                 | 1  | 535.507     | 529.957 | <.001 |
| Genotype        | 6.254                   | 1  | 6.254       | 6.189   | .020  |
| Sex             | .007                    | 1  | .007        | .007    | .933  |
| Genotype * Sex  | .554                    | 1  | .554        | .548    | .466  |
| Error           | 26.272                  | 26 | 1.010       |         |       |
| Total           | 571.000                 | 30 |             |         |       |
| Corrected Total | 33.367                  | 29 |             |         |       |

a. R Squared = .213 (Adjusted R Squared = .122)

```
UNIANOVA shredded BY Genotype Sex
/METHOD=SSTYPE(3)
/INTERCEPT=INCLUDE
/CRITERIA=ALPHA(0.05)
/DESIGN=Genotype Sex Genotype*Sex.
```

## Univariate Analysis of Variance

## Notes

|                        |                                |                                                                                                                                                         |
|------------------------|--------------------------------|---------------------------------------------------------------------------------------------------------------------------------------------------------|
| Output Created         |                                | 23-AUG-2022 14:24:...                                                                                                                                   |
| Comments               |                                |                                                                                                                                                         |
| Input                  | Data                           | /Users/jeffneul/Jeff's Research/Neul Manuscripts/FoxG1/June_Aug 2022 stat sex and effect size/SPSS files/SPSS Data Files/June 2022 Nest sex EF data.sav |
|                        | Active Dataset                 | DataSet4                                                                                                                                                |
|                        | Filter                         | <none>                                                                                                                                                  |
|                        | Weight                         | <none>                                                                                                                                                  |
|                        | Split File                     | <none>                                                                                                                                                  |
|                        | N of Rows in Working Data File | 30                                                                                                                                                      |
| Missing Value Handling | Definition of Missing          | User-defined missing values are treated as missing.                                                                                                     |
|                        | Cases Used                     | Statistics are based on all cases with valid data for all variables in the model.                                                                       |
| Syntax                 |                                | UNIANOVA shredded BY Genotype Sex<br>/METHOD=SSTYPE(3)<br>/INTERCEPT=INCLUDE<br>/CRITERIA=ALPHA (0.05)<br>/DESIGN=Genotype Sex Genotype*Sex.            |
| Resources              | Processor Time                 | 00:00:00.01                                                                                                                                             |
|                        | Elapsed Time                   | 00:00:00.00                                                                                                                                             |

### Between-Subjects Factors

|          |    | N  |
|----------|----|----|
| Genotype | KI | 15 |
|          | WT | 15 |
| Sex      | F  | 14 |
|          | M  | 16 |

## Tests of Between-Subjects Effects

Dependent Variable: % shredded

| Source          | Type III Sum of Squares | df | Mean Square | F       | Sig.  |
|-----------------|-------------------------|----|-------------|---------|-------|
| Corrected Model | 3075.830 <sup>a</sup>   | 3  | 1025.277    | 1.871   | .159  |
| Intercept       | 162169.074              | 1  | 162169.074  | 295.895 | <.001 |
| Genotype        | 2062.888                | 1  | 2062.888    | 3.764   | .063  |
| Sex             | 69.192                  | 1  | 69.192      | .126    | .725  |
| Genotype * Sex  | 763.098                 | 1  | 763.098     | 1.392   | .249  |
| Error           | 14249.641               | 26 | 548.063     |         |       |
| Total           | 179770.198              | 30 |             |         |       |
| Corrected Total | 17325.471               | 29 |             |         |       |

a. R Squared = .178 (Adjusted R Squared = .083)

```
UNIANOVA NestScore BY Genotype Sex
/METHOD=SSTYPE(3)
/INTERCEPT=INCLUDE
/EMMEANS=TABLES(Genotype)
/EMMEANS=TABLES(Sex)
/PRINT ETASQ
/CRITERIA=ALPHA(.05)
/DESIGN=Genotype Sex.
```

## Univariate Analysis of Variance

## Notes

|                        |                                |                                                                                                                                                                                                       |
|------------------------|--------------------------------|-------------------------------------------------------------------------------------------------------------------------------------------------------------------------------------------------------|
| Output Created         |                                | 23-AUG-2022 14:25:...                                                                                                                                                                                 |
| Comments               |                                |                                                                                                                                                                                                       |
| Input                  | Data                           | /Users/jeffneul/Jeff's Research/Neul Manuscripts/FoxG1/June _Aug 2022 stat sex and effect size/SPSS files/SPSS Data Files/June 2022 Nest sex EF data.sav                                              |
|                        | Active Dataset                 | DataSet4                                                                                                                                                                                              |
|                        | Filter                         | <none>                                                                                                                                                                                                |
|                        | Weight                         | <none>                                                                                                                                                                                                |
|                        | Split File                     | <none>                                                                                                                                                                                                |
|                        | N of Rows in Working Data File | 30                                                                                                                                                                                                    |
| Missing Value Handling | Definition of Missing          | User-defined missing values are treated as missing.                                                                                                                                                   |
|                        | Cases Used                     | Statistics are based on all cases with valid data for all variables in the model.                                                                                                                     |
| Syntax                 |                                | UNIANOVA NestScore BY Genotype Sex<br>/METHOD=SSTYPE(3)<br>/INTERCEPT=INCLUDE<br>/EMMEANS=TABLES (Genotype)<br>/EMMEANS=TABLES (Sex)<br>/PRINT ETASQ<br>/CRITERIA=ALPHA(.05)<br>/DESIGN=Genotype Sex. |
| Resources              | Processor Time                 | 00:00:00.01                                                                                                                                                                                           |
|                        | Elapsed Time                   | 00:00:00.00                                                                                                                                                                                           |

### Between-Subjects Factors

|          |    | N  |
|----------|----|----|
| Genotype | KI | 15 |
|          | WT | 15 |
| Sex      | F  | 14 |
|          | M  | 16 |



## Tests of Between-Subjects Effects

Dependent Variable: Nest Score

| Source          | Type III Sum of Squares | df | Mean Square | F       | Sig.  | Partial Eta Squared |
|-----------------|-------------------------|----|-------------|---------|-------|---------------------|
| Corrected Model | 6.541 <sup>a</sup>      | 2  | 3.270       | 3.292   | .053  | .196                |
| Intercept       | 535.507                 | 1  | 535.507     | 538.980 | <.001 | .952                |
| Genotype        | 6.533                   | 1  | 6.533       | 6.576   | .016  | .196                |
| Sex             | .007                    | 1  | .007        | .007    | .932  | .000                |
| Error           | 26.826                  | 27 | .994        |         |       |                     |
| Total           | 571.000                 | 30 |             |         |       |                     |
| Corrected Total | 33.367                  | 29 |             |         |       |                     |

a. R Squared = .196 (Adjusted R Squared = .136)

## Estimated Marginal Means

### 1. Genotype

Dependent Variable: Nest Score

| Genotype | Mean  | Std. Error | 95% Confidence Interval |             |
|----------|-------|------------|-------------------------|-------------|
|          |       |            | Lower Bound             | Upper Bound |
| KI       | 3.768 | .258       | 3.239                   | 4.296       |
| WT       | 4.701 | .258       | 4.172                   | 5.230       |

### 2. Sex

Dependent Variable: Nest Score

| Sex | Mean  | Std. Error | 95% Confidence Interval |             |
|-----|-------|------------|-------------------------|-------------|
|     |       |            | Lower Bound             | Upper Bound |
| F   | 4.250 | .266       | 3.703                   | 4.797       |
| M   | 4.219 | .249       | 3.707                   | 4.730       |

UNIANOVA shredded BY Genotype Sex

/METHOD=SSTYPE(3)

/INTERCEPT=INCLUDE

/EMMEANS=TABLES(Genotype)

/EMMEANS=TABLES(Sex)

/PRINT ETASQ

/CRITERIA=ALPHA(.05)

/DESIGN=Genotype Sex.

## Univariate Analysis of Variance

## Notes

|                        |                                |                                                                                                                                                                                                      |
|------------------------|--------------------------------|------------------------------------------------------------------------------------------------------------------------------------------------------------------------------------------------------|
| Output Created         |                                | 23-AUG-2022 14:25:...                                                                                                                                                                                |
| Comments               |                                |                                                                                                                                                                                                      |
| Input                  | Data                           | /Users/jeffneul/Jeff's Research/Neul Manuscripts/FoxG1/June _Aug 2022 stat sex and effect size/SPSS files/SPSS Data Files/June 2022 Nest sex EF data.sav                                             |
|                        | Active Dataset                 | DataSet4                                                                                                                                                                                             |
|                        | Filter                         | <none>                                                                                                                                                                                               |
|                        | Weight                         | <none>                                                                                                                                                                                               |
|                        | Split File                     | <none>                                                                                                                                                                                               |
|                        | N of Rows in Working Data File | 30                                                                                                                                                                                                   |
| Missing Value Handling | Definition of Missing          | User-defined missing values are treated as missing.                                                                                                                                                  |
|                        | Cases Used                     | Statistics are based on all cases with valid data for all variables in the model.                                                                                                                    |
| Syntax                 |                                | UNIANOVA shredded BY Genotype Sex<br>/METHOD=SSTYPE(3)<br>/INTERCEPT=INCLUDE<br>/EMMEANS=TABLES (Genotype)<br>/EMMEANS=TABLES (Sex)<br>/PRINT ETASQ<br>/CRITERIA=ALPHA(.05)<br>/DESIGN=Genotype Sex. |
| Resources              | Processor Time                 | 00:00:00.02                                                                                                                                                                                          |
|                        | Elapsed Time                   | 00:00:00.00                                                                                                                                                                                          |

### Between-Subjects Factors

|          |    | N  |
|----------|----|----|
| Genotype | KI | 15 |
|          | WT | 15 |
| Sex      | F  | 14 |
|          | M  | 16 |

## Tests of Between-Subjects Effects

Dependent Variable: % shredded

| Source          | Type III Sum of Squares | df | Mean Square | F       | Sig.  | Partial Eta Squared |
|-----------------|-------------------------|----|-------------|---------|-------|---------------------|
| Corrected Model | 2312.731 <sup>a</sup>   | 2  | 1156.366    | 2.080   | .145  | .133                |
| Intercept       | 162169.074              | 1  | 162169.074  | 291.657 | <.001 | .915                |
| Genotype        | 2243.540                | 1  | 2243.540    | 4.035   | .055  | .130                |
| Sex             | 69.192                  | 1  | 69.192      | .124    | .727  | .005                |
| Error           | 15012.740               | 27 | 556.027     |         |       |                     |
| Total           | 179770.198              | 30 |             |         |       |                     |
| Corrected Total | 17325.471               | 29 |             |         |       |                     |

a. R Squared = .133 (Adjusted R Squared = .069)

## Estimated Marginal Means

### 1. Genotype

Dependent Variable: % shredded

| Genotype | Mean   | Std. Error | 95% Confidence Interval |             |
|----------|--------|------------|-------------------------|-------------|
|          |        |            | Lower Bound             | Upper Bound |
| KI       | 65.039 | 6.095      | 52.533                  | 77.545      |
| WT       | 82.335 | 6.095      | 69.828                  | 94.841      |

### 2. Sex

Dependent Variable: % shredded

| Sex | Mean   | Std. Error | 95% Confidence Interval |             |
|-----|--------|------------|-------------------------|-------------|
|     |        |            | Lower Bound             | Upper Bound |
| F   | 75.209 | 6.302      | 62.278                  | 88.140      |
| M   | 72.165 | 5.895      | 60.069                  | 84.261      |

## **3 Chamber**

```

UNIANOVA SocialIndexCup BY Geno SEX
/METHOD=SSTYPE(3)
/INTERCEPT=INCLUDE
/CRITERIA=ALPHA(0.05)
/DESIGN=Geno SEX Geno*SEX.

```

## Univariate Analysis of Variance

### Notes

|                        |                                |                                                                                                                                                           |
|------------------------|--------------------------------|-----------------------------------------------------------------------------------------------------------------------------------------------------------|
| Output Created         |                                | 22-AUG-2022 16:59:...                                                                                                                                     |
| Comments               |                                |                                                                                                                                                           |
| Input                  | Data                           | /Users/jeffneul/Jeff's Research/Neul Manuscripts/FoxG1/June 2022 stat sex and effect size/SPSS files/SPSS Data Files/June 2022 3CH Social sex EF data.sav |
|                        | Active Dataset                 | DataSet9                                                                                                                                                  |
|                        | Filter                         | <none>                                                                                                                                                    |
|                        | Weight                         | <none>                                                                                                                                                    |
|                        | Split File                     | <none>                                                                                                                                                    |
|                        | N of Rows in Working Data File | 27                                                                                                                                                        |
| Missing Value Handling | Definition of Missing          | User-defined missing values are treated as missing.                                                                                                       |
|                        | Cases Used                     | Statistics are based on all cases with valid data for all variables in the model.                                                                         |
| Syntax                 |                                | UNIANOVA<br>SocialIndexCup BY Geno<br>SEX<br>/METHOD=SSTYPE(3)<br>/INTERCEPT=INCLUDE<br>/CRITERIA=ALPHA<br>(0.05)<br>/DESIGN=Geno SEX<br>Geno*SEX.        |
| Resources              | Processor Time                 | 00:00:00.01                                                                                                                                               |
|                        | Elapsed Time                   | 00:00:00.00                                                                                                                                               |

## Between-Subjects Factors

|      |    | N  |
|------|----|----|
| Geno | KI | 16 |
|      | WT | 11 |
| SEX  | F  | 14 |
|      | M  | 13 |

## Tests of Between-Subjects Effects

Dependent Variable: Social Index Cup

| Source          | Type III Sum of Squares | df | Mean Square | F      | Sig.  |
|-----------------|-------------------------|----|-------------|--------|-------|
| Corrected Model | .205 <sup>a</sup>       | 3  | .068        | 1.395  | .269  |
| Intercept       | .727                    | 1  | .727        | 14.818 | <.001 |
| Geno            | .191                    | 1  | .191        | 3.903  | .060  |
| SEX             | .040                    | 1  | .040        | .808   | .378  |
| Geno * SEX      | .001                    | 1  | .001        | .013   | .910  |
| Error           | 1.128                   | 23 | .049        |        |       |
| Total           | 2.310                   | 27 |             |        |       |
| Corrected Total | 1.334                   | 26 |             |        |       |

a. R Squared = .154 (Adjusted R Squared = .044)

```
UNIANOVA SocialIndexChamberBY Geno SEX
/METHOD=SSTYPE(3)
/INTERCEPT=INCLUDE
/CRITERIA=ALPHA(0.05)
/DESIGN=Geno SEX Geno*SEX.
```

## Univariate Analysis of Variance

## Notes

|                        |                                |                                                                                                                                                           |
|------------------------|--------------------------------|-----------------------------------------------------------------------------------------------------------------------------------------------------------|
| Output Created         |                                | 22-AUG-2022 16:59:...                                                                                                                                     |
| Comments               |                                |                                                                                                                                                           |
| Input                  | Data                           | /Users/jeffneul/Jeff's Research/Neul Manuscripts/FoxG1/June 2022 stat sex and effect size/SPSS files/SPSS Data Files/June 2022 3CH Social sex EF data.sav |
|                        | Active Dataset                 | DataSet9                                                                                                                                                  |
|                        | Filter                         | <none>                                                                                                                                                    |
|                        | Weight                         | <none>                                                                                                                                                    |
|                        | Split File                     | <none>                                                                                                                                                    |
|                        | N of Rows in Working Data File | 27                                                                                                                                                        |
| Missing Value Handling | Definition of Missing          | User-defined missing values are treated as missing.                                                                                                       |
|                        | Cases Used                     | Statistics are based on all cases with valid data for all variables in the model.                                                                         |
| Syntax                 |                                | UNIANOVA<br>SocialIndexChamber BY<br>Geno SEX<br>/METHOD=SSTYPE(3)<br>/INTERCEPT=INCLUDE<br>/CRITERIA=ALPHA<br>(0.05)<br>/DESIGN=Geno SEX<br>Geno*SEX.    |
| Resources              | Processor Time                 | 00:00:00.01                                                                                                                                               |
|                        | Elapsed Time                   | 00:00:00.00                                                                                                                                               |

### Between-Subjects Factors

|      |    | N  |
|------|----|----|
| Geno | KI | 16 |
|      | WT | 11 |
| SEX  | F  | 14 |
|      | M  | 13 |

## Tests of Between-Subjects Effects

Dependent Variable: Social Index Chamber

| Source          | Type III Sum of Squares | df | Mean Square | F      | Sig.  |
|-----------------|-------------------------|----|-------------|--------|-------|
| Corrected Model | .137 <sup>a</sup>       | 3  | .046        | 1.550  | .228  |
| Intercept       | .474                    | 1  | .474        | 16.022 | <.001 |
| Geno            | .137                    | 1  | .137        | 4.637  | .042  |
| SEX             | .007                    | 1  | .007        | .238   | .630  |
| Geno * SEX      | .004                    | 1  | .004        | .135   | .716  |
| Error           | .680                    | 23 | .030        |        |       |
| Total           | 1.467                   | 27 |             |        |       |
| Corrected Total | .817                    | 26 |             |        |       |

a. R Squared = .168 (Adjusted R Squared = .060)

```
UNIANOVA SocialIndexCup BY Geno SEX
/METHOD=SSTYPE(3)
/INTERCEPT=INCLUDE
/EMMEANS=TABLES(Geno)
/EMMEANS=TABLES(SEX)
/PRINT ETASQ
/CRITERIA=ALPHA(.05)
/DESIGN=Geno SEX.
```

## Univariate Analysis of Variance



## Notes

|                        |                                |                                                                                                                                                                                        |
|------------------------|--------------------------------|----------------------------------------------------------------------------------------------------------------------------------------------------------------------------------------|
| Output Created         |                                | 22-AUG-2022 16:59:...                                                                                                                                                                  |
| Comments               |                                |                                                                                                                                                                                        |
| Input                  | Data                           | /Users/jeffneul/Jeff's Research/Neul Manuscripts/FoxG1/June 2022 stat sex and effect size/SPSS files/SPSS Data Files/June 2022 3CH Social sex EF data.sav                              |
|                        | Active Dataset                 | DataSet9                                                                                                                                                                               |
|                        | Filter                         | <none>                                                                                                                                                                                 |
|                        | Weight                         | <none>                                                                                                                                                                                 |
|                        | Split File                     | <none>                                                                                                                                                                                 |
|                        | N of Rows in Working Data File | 27                                                                                                                                                                                     |
| Missing Value Handling | Definition of Missing          | User-defined missing values are treated as missing.                                                                                                                                    |
|                        | Cases Used                     | Statistics are based on all cases with valid data for all variables in the model.                                                                                                      |
| Syntax                 |                                | <pre> UNIANOVA SocialIndexCup BY Geno SEX /METHOD=SSTYPE(3) /INTERCEPT=INCLUDE /EMMEANS=TABLES (Geno) /EMMEANS=TABLES (SEX) /PRINT ETASQ /CRITERIA=ALPHA(.05) /DESIGN=Geno SEX. </pre> |
| Resources              | Processor Time                 | 00:00:00.02                                                                                                                                                                            |
|                        | Elapsed Time                   | 00:00:00.00                                                                                                                                                                            |

### Between-Subjects Factors

|      |    | N  |
|------|----|----|
| Geno | KI | 16 |
|      | WT | 11 |
| SEX  | F  | 14 |
|      | M  | 13 |

## Tests of Between-Subjects Effects

Dependent Variable: Social Index Cup

| Source          | Type III Sum of Squares | df | Mean Square | F      | Sig.  | Partial Eta Squared |
|-----------------|-------------------------|----|-------------|--------|-------|---------------------|
| Corrected Model | .205 <sup>a</sup>       | 2  | .102        | 2.176  | .135  | .154                |
| Intercept       | .772                    | 1  | .772        | 16.407 | <.001 | .406                |
| Geno            | .191                    | 1  | .191        | 4.071  | .055  | .145                |
| SEX             | .039                    | 1  | .039        | .836   | .370  | .034                |
| Error           | 1.129                   | 24 | .047        |        |       |                     |
| Total           | 2.310                   | 27 |             |        |       |                     |
| Corrected Total | 1.334                   | 26 |             |        |       |                     |

a. R Squared = .154 (Adjusted R Squared = .083)

## Estimated Marginal Means

### 1. Geno

Dependent Variable: Social Index Cup

| Geno | Mean | Std. Error | 95% Confidence Interval |             |
|------|------|------------|-------------------------|-------------|
|      |      |            | Lower Bound             | Upper Bound |
| KI   | .260 | .054       | .147                    | .372        |
| WT   | .085 | .066       | -.052                   | .222        |

### 2. SEX

Dependent Variable: Social Index Cup

| SEX | Mean | Std. Error | 95% Confidence Interval |             |
|-----|------|------------|-------------------------|-------------|
|     |      |            | Lower Bound             | Upper Bound |
| F   | .211 | .058       | .092                    | .331        |
| M   | .134 | .062       | .005                    | .262        |

```

UNIANOVA SocialIndexChamberBY Geno SEX
/METHOD=SSTYPE(3)
/INTERCEPT=INCLUDE
/EMMEANS=TABLES(Geno)
/EMMEANS=TABLES(SEX)
/PRINT ETASQ
/CRITERIA=ALPHA(.05)
/DESIGN=Geno SEX.

```

## Univariate Analysis of Variance

## Notes

|                        |                                |                                                                                                                                                                                                            |
|------------------------|--------------------------------|------------------------------------------------------------------------------------------------------------------------------------------------------------------------------------------------------------|
| Output Created         |                                | 22-AUG-2022 17:00:...                                                                                                                                                                                      |
| Comments               |                                |                                                                                                                                                                                                            |
| Input                  | Data                           | /Users/jeffneul/Jeff's Research/Neul Manuscripts/FoxG1/June 2022 stat sex and effect size/SPSS files/SPSS Data Files/June 2022 3CH Social sex EF data.sav                                                  |
|                        | Active Dataset                 | DataSet9                                                                                                                                                                                                   |
|                        | Filter                         | <none>                                                                                                                                                                                                     |
|                        | Weight                         | <none>                                                                                                                                                                                                     |
|                        | Split File                     | <none>                                                                                                                                                                                                     |
|                        | N of Rows in Working Data File | 27                                                                                                                                                                                                         |
| Missing Value Handling | Definition of Missing          | User-defined missing values are treated as missing.                                                                                                                                                        |
|                        | Cases Used                     | Statistics are based on all cases with valid data for all variables in the model.                                                                                                                          |
| Syntax                 |                                | <pre> UNIANOVA SocialIndexChamber BY Geno SEX   /METHOD=SSTYPE(3)   /INTERCEPT=INCLUDE   /EMMEANS=TABLES (Geno) /EMMEANS=TABLES (SEX) /PRINT ETASQ /CRITERIA=ALPHA(.05) /DESIGN=Geno SEX.           </pre> |
| Resources              | Processor Time                 | 00:00:00.02                                                                                                                                                                                                |
|                        | Elapsed Time                   | 00:00:00.00                                                                                                                                                                                                |

### Between-Subjects Factors

|      |    | N  |
|------|----|----|
| Geno | KI | 16 |
|      | WT | 11 |
| SEX  | F  | 14 |
|      | M  | 13 |

## Tests of Between-Subjects Effects

Dependent Variable: Social Index Chamber

| Source          | Type III Sum of Squares | df | Mean Square | F      | Sig.  | Partial Eta Squared |
|-----------------|-------------------------|----|-------------|--------|-------|---------------------|
| Corrected Model | .133 <sup>a</sup>       | 2  | .067        | 2.342  | .118  | .163                |
| Intercept       | .516                    | 1  | .516        | 18.119 | <.001 | .430                |
| Geno            | .133                    | 1  | .133        | 4.684  | .041  | .163                |
| SEX             | .005                    | 1  | .005        | .182   | .674  | .008                |
| Error           | .684                    | 24 | .028        |        |       |                     |
| Total           | 1.467                   | 27 |             |        |       |                     |
| Corrected Total | .817                    | 26 |             |        |       |                     |

a. R Squared = .163 (Adjusted R Squared = .094)

## Estimated Marginal Means

### 1. Geno

Dependent Variable: Social Index Chamber

| Geno | Mean | Std. Error | 95% Confidence Interval |             |
|------|------|------------|-------------------------|-------------|
|      |      |            | Lower Bound             | Upper Bound |
| KI   | .214 | .042       | .127                    | .302        |
| WT   | .068 | .052       | -.039                   | .175        |

### 2. SEX

Dependent Variable: Social Index Chamber

| SEX | Mean | Std. Error | 95% Confidence Interval |             |
|-----|------|------------|-------------------------|-------------|
|     |      |            | Lower Bound             | Upper Bound |
| F   | .155 | .045       | .062                    | .248        |
| M   | .127 | .049       | .027                    | .227        |

```

UNIANOVA NoveltyIndexCup BY Geno SEX
/METHOD=SSTYPE(3)
/INTERCEPT=INCLUDE
/CRITERIA=ALPHA(0.05)
/DESIGN=Geno SEX Geno*SEX.

```

## Univariate Analysis of Variance

### Notes

|                        |                                |                                                                                                                                                            |
|------------------------|--------------------------------|------------------------------------------------------------------------------------------------------------------------------------------------------------|
| Output Created         |                                | 22-AUG-2022 17:11:...                                                                                                                                      |
| Comments               |                                |                                                                                                                                                            |
| Input                  | Data                           | /Users/jeffneul/Jeff's Research/Neul Manuscripts/FoxG1/June 2022 stat sex and effect size/SPSS files/SPSS Data Files/June 2022 3CH Novelty sex EF data.sav |
|                        | Active Dataset                 | DataSet10                                                                                                                                                  |
|                        | Filter                         | <none>                                                                                                                                                     |
|                        | Weight                         | <none>                                                                                                                                                     |
|                        | Split File                     | <none>                                                                                                                                                     |
|                        | N of Rows in Working Data File | 27                                                                                                                                                         |
| Missing Value Handling | Definition of Missing          | User-defined missing values are treated as missing.                                                                                                        |
|                        | Cases Used                     | Statistics are based on all cases with valid data for all variables in the model.                                                                          |
| Syntax                 |                                | UNIANOVA NoveltyIndexCup BY Geno SEX /METHOD=SSTYPE(3) /INTERCEPT=INCLUDE /CRITERIA=ALPHA (0.05) /DESIGN=Geno SEX Geno*SEX.                                |
| Resources              | Processor Time                 | 00:00:00.01                                                                                                                                                |
|                        | Elapsed Time                   | 00:00:00.00                                                                                                                                                |

## Between-Subjects Factors

|      |    | N  |
|------|----|----|
| Geno | KI | 16 |
|      | WT | 11 |
| SEX  | F  | 14 |
|      | M  | 13 |

## Tests of Between-Subjects Effects

Dependent Variable: Novelty Index Cup

| Source          | Type III Sum of Squares | df | Mean Square | F      | Sig.  |
|-----------------|-------------------------|----|-------------|--------|-------|
| Corrected Model | .394 <sup>a</sup>       | 3  | .131        | 1.485  | .245  |
| Intercept       | 1.275                   | 1  | 1.275       | 14.414 | <.001 |
| Geno            | .318                    | 1  | .318        | 3.597  | .071  |
| SEX             | .001                    | 1  | .001        | .013   | .910  |
| Geno * SEX      | .091                    | 1  | .091        | 1.032  | .320  |
| Error           | 2.035                   | 23 | .088        |        |       |
| Total           | 3.450                   | 27 |             |        |       |
| Corrected Total | 2.429                   | 26 |             |        |       |

a. R Squared = .162 (Adjusted R Squared = .053)

```
UNIANOVA NoveltyIndexChamberBY Geno SEX
/METHOD=SSTYPE(3)
/INTERCEPT=INCLUDE
/CRITERIA=ALPHA(0.05)
/DESIGN=Geno SEX Geno*SEX.
```

## Univariate Analysis of Variance

## Notes

|                        |                                |                                                                                                                                                            |
|------------------------|--------------------------------|------------------------------------------------------------------------------------------------------------------------------------------------------------|
| Output Created         |                                | 22-AUG-2022 17:11:...                                                                                                                                      |
| Comments               |                                |                                                                                                                                                            |
| Input                  | Data                           | /Users/jeffneul/Jeff's Research/Neul Manuscripts/FoxG1/June 2022 stat sex and effect size/SPSS files/SPSS Data Files/June 2022 3CH Novelty sex EF data.sav |
|                        | Active Dataset                 | DataSet10                                                                                                                                                  |
|                        | Filter                         | <none>                                                                                                                                                     |
|                        | Weight                         | <none>                                                                                                                                                     |
|                        | Split File                     | <none>                                                                                                                                                     |
|                        | N of Rows in Working Data File | 27                                                                                                                                                         |
| Missing Value Handling | Definition of Missing          | User-defined missing values are treated as missing.                                                                                                        |
|                        | Cases Used                     | Statistics are based on all cases with valid data for all variables in the model.                                                                          |
| Syntax                 |                                | UNIANOVA<br>NoveltyIndexChamber<br>BY Geno SEX<br>/METHOD=SSTYPE(3)<br>/INTERCEPT=INCLUDE<br>/CRITERIA=ALPHA<br>(0.05)<br>/DESIGN=Geno SEX<br>Geno*SEX.    |
| Resources              | Processor Time                 | 00:00:00.01                                                                                                                                                |
|                        | Elapsed Time                   | 00:00:00.00                                                                                                                                                |

### Between-Subjects Factors

|      |    | N  |
|------|----|----|
| Geno | KI | 16 |
|      | WT | 11 |
| SEX  | F  | 14 |
|      | M  | 13 |

## Tests of Between-Subjects Effects

Dependent Variable: Novelty Index Chamber

| Source          | Type III Sum of Squares | df | Mean Square | F      | Sig.  |
|-----------------|-------------------------|----|-------------|--------|-------|
| Corrected Model | .332 <sup>a</sup>       | 3  | .111        | 2.590  | .077  |
| Intercept       | 1.428                   | 1  | 1.428       | 33.428 | <.001 |
| Geno            | .224                    | 1  | .224        | 5.234  | .032  |
| SEX             | .028                    | 1  | .028        | .654   | .427  |
| Geno * SEX      | .032                    | 1  | .032        | .739   | .399  |
| Error           | .982                    | 23 | .043        |        |       |
| Total           | 2.589                   | 27 |             |        |       |
| Corrected Total | 1.314                   | 26 |             |        |       |

a. R Squared = .253 (Adjusted R Squared = .155)

```
UNIANOVA NoveltyIndexCupBY Geno SEX
/METHOD=SSTYPE(3)
/INTERCEPT=INCLUDE
/EMMEANS=TABLES(Geno)
/EMMEANS=TABLES(SEX)
/PRINT ETASQ
/CRITERIA=ALPHA(.05)
/DESIGN=Geno SEX.
```

## Univariate Analysis of Variance



## Notes

|                        |                                |                                                                                                                                                                                                                 |
|------------------------|--------------------------------|-----------------------------------------------------------------------------------------------------------------------------------------------------------------------------------------------------------------|
| Output Created         |                                | 22-AUG-2022 17:12:...                                                                                                                                                                                           |
| Comments               |                                |                                                                                                                                                                                                                 |
| Input                  | Data                           | /Users/jeffneul/Jeff's Research/Neul Manuscripts/FoxG1/June 2022 stat sex and effect size/SPSS files/SPSS Data Files/June 2022 3CH Novelty sex EF data.sav                                                      |
|                        | Active Dataset                 | DataSet10                                                                                                                                                                                                       |
|                        | Filter                         | <none>                                                                                                                                                                                                          |
|                        | Weight                         | <none>                                                                                                                                                                                                          |
|                        | Split File                     | <none>                                                                                                                                                                                                          |
|                        | N of Rows in Working Data File | 27                                                                                                                                                                                                              |
| Missing Value Handling | Definition of Missing          | User-defined missing values are treated as missing.                                                                                                                                                             |
|                        | Cases Used                     | Statistics are based on all cases with valid data for all variables in the model.                                                                                                                               |
| Syntax                 |                                | <pre> UNIANOVA NoveltyIndexCup BY Geno SEX   /METHOD=SSTYPE(3)   /INTERCEPT=INCLUDE   /EMMEANS=TABLES (Geno)   /EMMEANS=TABLES (SEX)   /PRINT ETASQ   /CRITERIA=ALPHA(.05)   /DESIGN=Geno SEX.           </pre> |
| Resources              | Processor Time                 | 00:00:00.01                                                                                                                                                                                                     |
|                        | Elapsed Time                   | 00:00:00.00                                                                                                                                                                                                     |

### Between-Subjects Factors

|      |    | N  |
|------|----|----|
| Geno | KI | 16 |
|      | WT | 11 |
| SEX  | F  | 14 |
|      | M  | 13 |

## Tests of Between-Subjects Effects

Dependent Variable: Novelty Index Cup

| Source          | Type III Sum of Squares | df | Mean Square | F      | Sig. | Partial Eta Squared |
|-----------------|-------------------------|----|-------------|--------|------|---------------------|
| Corrected Model | .303 <sup>a</sup>       | 2  | .151        | 1.709  | .202 | .125                |
| Intercept       | 1.187                   | 1  | 1.187       | 13.406 | .001 | .358                |
| Geno            | .284                    | 1  | .284        | 3.201  | .086 | .118                |
| SEX             | .001                    | 1  | .001        | .011   | .916 | .000                |
| Error           | 2.126                   | 24 | .089        |        |      |                     |
| Total           | 3.450                   | 27 |             |        |      |                     |
| Corrected Total | 2.429                   | 26 |             |        |      |                     |

a. R Squared = .125 (Adjusted R Squared = .052)

## Estimated Marginal Means

### 1. Geno

Dependent Variable: Novelty Index Cup

| Geno | Mean | Std. Error | 95% Confidence Interval |             |
|------|------|------------|-------------------------|-------------|
|      |      |            | Lower Bound             | Upper Bound |
| KI   | .108 | .075       | -.047                   | .262        |
| WT   | .320 | .091       | .132                    | .508        |

### 2. SEX

Dependent Variable: Novelty Index Cup

| SEX | Mean | Std. Error | 95% Confidence Interval |             |
|-----|------|------------|-------------------------|-------------|
|     |      |            | Lower Bound             | Upper Bound |
| F   | .220 | .080       | .056                    | .384        |
| M   | .208 | .086       | .031                    | .385        |

```
UNIANOVA NoveltyIndexChamberBY Geno SEX
/METHOD=SSTYPE(3)
/INTERCEPT=INCLUDE
/EMMEANS=TABLES(Geno)
/EMMEANS=TABLES(SEX)
/PRINT ETASQ
/CRITERIA=ALPHA(.05)
/DESIGN=Geno SEX.
```

## Univariate Analysis of Variance

## Notes

|                        |                                |                                                                                                                                                                                             |
|------------------------|--------------------------------|---------------------------------------------------------------------------------------------------------------------------------------------------------------------------------------------|
| Output Created         |                                | 22-AUG-2022 17:12:...                                                                                                                                                                       |
| Comments               |                                |                                                                                                                                                                                             |
| Input                  | Data                           | /Users/jeffneul/Jeff's Research/Neul Manuscripts/FoxG1/June 2022 stat sex and effect size/SPSS files/SPSS Data Files/June 2022 3CH Novelty sex EF data.sav                                  |
|                        | Active Dataset                 | DataSet10                                                                                                                                                                                   |
|                        | Filter                         | <none>                                                                                                                                                                                      |
|                        | Weight                         | <none>                                                                                                                                                                                      |
|                        | Split File                     | <none>                                                                                                                                                                                      |
|                        | N of Rows in Working Data File | 27                                                                                                                                                                                          |
| Missing Value Handling | Definition of Missing          | User-defined missing values are treated as missing.                                                                                                                                         |
|                        | Cases Used                     | Statistics are based on all cases with valid data for all variables in the model.                                                                                                           |
| Syntax                 |                                | <pre> UNIANOVA NoveltyIndexChamber BY Geno SEX /METHOD=SSTYPE(3) /INTERCEPT=INCLUDE /EMMEANS=TABLES (Geno) /EMMEANS=TABLES (SEX) /PRINT ETASQ /CRITERIA=ALPHA(.05) /DESIGN=Geno SEX. </pre> |
| Resources              | Processor Time                 | 00:00:00.02                                                                                                                                                                                 |
|                        | Elapsed Time                   | 00:00:00.00                                                                                                                                                                                 |

### Between-Subjects Factors

|      |    | N  |
|------|----|----|
| Geno | KI | 16 |
|      | WT | 11 |
| SEX  | F  | 14 |
|      | M  | 13 |

## Tests of Between-Subjects Effects

Dependent Variable: Novelty Index Chamber

| Source          | Type III Sum of Squares | df | Mean Square | F      | Sig.  | Partial Eta Squared |
|-----------------|-------------------------|----|-------------|--------|-------|---------------------|
| Corrected Model | .300 <sup>a</sup>       | 2  | .150        | 3.554  | .044  | .229                |
| Intercept       | 1.403                   | 1  | 1.403       | 33.202 | <.001 | .580                |
| Geno            | .207                    | 1  | .207        | 4.905  | .037  | .170                |
| SEX             | .044                    | 1  | .044        | 1.046  | .317  | .042                |
| Error           | 1.014                   | 24 | .042        |        |       |                     |
| Total           | 2.589                   | 27 |             |        |       |                     |
| Corrected Total | 1.314                   | 26 |             |        |       |                     |

a. R Squared = .229 (Adjusted R Squared = .164)

## Estimated Marginal Means

### 1. Geno

Dependent Variable: Novelty Index Chamber

| Geno | Mean | Std. Error | 95% Confidence Interval |             |
|------|------|------------|-------------------------|-------------|
|      |      |            | Lower Bound             | Upper Bound |
| KI   | .142 | .052       | .035                    | .248        |
| WT   | .323 | .063       | .194                    | .453        |

### 2. SEX

Dependent Variable: Novelty Index Chamber

| SEX | Mean | Std. Error | 95% Confidence Interval |             |
|-----|------|------------|-------------------------|-------------|
|     |      |            | Lower Bound             | Upper Bound |
| F   | .274 | .055       | .160                    | .387        |
| M   | .191 | .059       | .069                    | .313        |
